# Supplementary material
Source: publisher site journal article supplement (https://www.spandidos-publications.com/4600/downloadSupplementary)
Supplement: Supplementary file 1 [file downloadSupplementary]

## Sheet: After-1_vs_Before-1
Table SV. All comparisions of miRNA expression in Post vs Pre.
miRNA expression for After-1 vs Before-1 Column A: Mature miRNA, the mature miRNA name. Column B: Pre-miRNA, the pre-miRNA name. Column C: Sequence, the mature miRNA sequence. Column D: Fold change, fold change between two samples. Column E: Regulation, 'up' indicates up-regulation, and 'down' indicates down-regulation. Column F ~ G: Tag Counts (normalized), the normalized tag counts of the matur…
miRNA Information			Fold change & Regulation		Tag counts (normalized)
mature-miRNA	pre-miRNA	mature-sequence	Fold Change	Regulation	After-1	Before-1
hsa-let-7a-3p	hsa-let-7a-1	CUAUACAAUCUACUGUCUUUC	-19	down		18
hsa-let-7a-3p	hsa-let-7a-3	CUAUACAAUCUACUGUCUUUC	-19	down		18
hsa-let-7a-5p	hsa-let-7a-1	UGAGGUAGUAGGUUGUAUAGUU	-2.70659	down	1168	3163
hsa-let-7a-5p	hsa-let-7a-2	UGAGGUAGUAGGUUGUAUAGUU	-2.70659	down	1168	3163
hsa-let-7a-5p	hsa-let-7a-3	UGAGGUAGUAGGUUGUAUAGUU	-2.70659	down	1168	3163
hsa-let-7b-5p	hsa-let-7b	UGAGGUAGUAGGUUGUGUGGUU	-1.55625	down	2079	3236
hsa-let-7c-5p	hsa-let-7c	UGAGGUAGUAGGUUGUAUGGUU	3.07267	up	1944	632
hsa-let-7d-3p	hsa-let-7d	CUAUACGACCUGCUGCCUUUCU	2.52222	up	226	89
hsa-let-7d-5p	hsa-let-7d	AGAGGUAGUAGGUUGCAUAGUU	2.61078	up	3051	1168
hsa-let-7e-5p	hsa-let-7e	UGAGGUAGGAGGUUGUAUAGUU	-1.91209	down	90	173
hsa-let-7f-5p	hsa-let-7f-1	UGAGGUAGUAGAUUGUAUAGUU	-1.5566	down	6792	10573
hsa-let-7f-5p	hsa-let-7f-2	UGAGGUAGUAGAUUGUAUAGUU	-1.5566	down	6792	10573
hsa-let-7g-5p	hsa-let-7g	UGAGGUAGUAGUUUGUACAGUU	-1.35934	down	12408	16867
hsa-let-7i-3p	hsa-let-7i	CUGCGCAAGCUACUGCCUUGCU	-13	down		12
hsa-let-7i-5p	hsa-let-7i	UGAGGUAGUAGUUUGUGCUGUU	1.58716	up	23754	14966
hsa-miR-1-3p	hsa-mir-1-2	UGGAAUGUAAAGAAGUAUGUAU	2.88242	up	2622	909
hsa-miR-1-3p	hsa-mir-1-1	UGGAAUGUAAAGAAGUAUGUAU	2.88242	up	2622	909
hsa-miR-100-5p	hsa-mir-100	AACCCGUAGAUCCGAACUUGUG	1.52222	up	136	89
hsa-miR-101-3p	hsa-mir-101-1	UACAGUACUGUGAUAACUGAA	-7.23797	down	373	2706
hsa-miR-101-3p	hsa-mir-101-2	UACAGUACUGUGAUAACUGAA	-7.23797	down	373	2706
hsa-miR-103a-3p	hsa-mir-103a-2	AGCAGCAUUGUACAGGGCUAUGA	-2.36749	down	848	2009
hsa-miR-103a-3p	hsa-mir-103a-1	AGCAGCAUUGUACAGGGCUAUGA	-2.36749	down	848	2009
hsa-miR-106b-3p	hsa-mir-106b	CCGCACUGUGGGUACUUGCUGC	2.42105	up	45	18
hsa-miR-106b-5p	hsa-mir-106b	UAAAGUGCUGACAGUGCAGAU	-3.68132	down	90	334
hsa-miR-107	hsa-mir-107	AGCAGCAUUGUACAGGGCUAUCA	1.48387	up	45	30
hsa-miR-10a-5p	hsa-mir-10a	UACCCUGUAGAUCCGAAUUUGUG	-1.13043	down	45	51
hsa-miR-10b-5p	hsa-mir-10b	UACCCUGUAGAACCGAAUUUGUG	80	up	79
hsa-miR-11400	hsa-mir-11400	UCGGCUGUGUAUCUCUGUGUC	-43	down		42
hsa-miR-1185-1-3p	hsa-mir-1185-1	AUAUACAGGGGGAGACUCUUAU	-13	down		12
hsa-miR-122-5p	hsa-mir-122	UGGAGUGUGACAAUGGUGUUUG	3.9305	up	13402	3409
hsa-miR-1246	hsa-mir-1246	AAUGGAUUUUUGGAGCAGG	-19	down		18
hsa-miR-125b-5p	hsa-mir-125b-1	UCCCUGAGACCCUAACUUGUGA	58	up	57
hsa-miR-125b-5p	hsa-mir-125b-2	UCCCUGAGACCCUAACUUGUGA	58	up	57
hsa-miR-126-3p	hsa-mir-126	UCGUACCGUGAGUAAUAAUGCG	-1.38662	down	881	1222
hsa-miR-126-5p	hsa-mir-126	CAUUAUUACUUUUGGUACGCG	-1.09508	down	588	644
hsa-miR-127-3p	hsa-mir-127	UCGGAUCCGUCUGAGCUUGGCU	-46	down		45
hsa-miR-1275	hsa-mir-1275	GUGGGGGAGAGGCUGUC	-19	down		18
hsa-miR-1277-3p	hsa-mir-1277	UACGUAGAUAUAUAUGUAUUUU	-19	down		18
hsa-miR-128-3p	hsa-mir-128-1	UCACAGUGAACCGGUCUCUUU	2.96833	up	1311	441
hsa-miR-128-3p	hsa-mir-128-2	UCACAGUGAACCGGUCUCUUU	2.96833	up	1311	441
hsa-miR-1299	hsa-mir-1299	UUCUGGAAUUCUGUGUGAGGGA	46	up	45
hsa-miR-1307-3p	hsa-mir-1307	ACUCGGCGUGGCGUCGGUCGUG	-120	down		119
hsa-miR-1307-5p	hsa-mir-1307	UCGACCGGACCUCGACCGGCU	-19	down		18
hsa-miR-130a-3p	hsa-mir-130a	CAGUGCAAUGUUAAAAGGGCAU	-73	down		72
hsa-miR-130b-3p	hsa-mir-130b	CAGUGCAAUGAUGAAAGGGCAU	-25	down		24
hsa-miR-133a-3p	hsa-mir-133a-1	UUUGGUCCCCUUCAACCAGCUG	2.42105	up	45	18
hsa-miR-133a-3p	hsa-mir-133a-2	UUUGGUCCCCUUCAACCAGCUG	2.42105	up	45	18
hsa-miR-134-5p	hsa-mir-134	UGUGACUGGUUGACCAGAGGGG	-1.30755	down	542	709
hsa-miR-136-3p	hsa-mir-136	CAUCAUCGUCUCAAAUGAGUCU	-13	down		12
hsa-miR-139-3p	hsa-mir-139	UGGAGACGCGGCCCUGUUGGAGU	-25	down		24
hsa-miR-139-5p	hsa-mir-139	UCUACAGUGCACGUGUCUCCAGU	-55	down		54
hsa-miR-140-3p	hsa-mir-140	UACCACAGGGUAGAACCACGG	2.11823	up	859	405
hsa-miR-140-5p	hsa-mir-140	CAGUGGUUUUACCCUAUGGUAG	2.68194	up	994	370
hsa-miR-142-3p	hsa-mir-142	UGUAGUGUUUCCUACUUUAUGGA	-1.34804	down	203	274
hsa-miR-142-5p	hsa-mir-142	CAUAAAGUAGAAAGCACUACU	-3.41758	down	90	310
hsa-miR-143-3p	hsa-mir-143	UGAGAUGAAGCACUGUAGCUC	2.74327	up	15493	5647
hsa-miR-144-3p	hsa-mir-144	UACAGUAUAGAUGAUGUACU	-174	down		173
hsa-miR-144-5p	hsa-mir-144	GGAUAUCAUCAUAUACUGUAAG	-25	down		24
hsa-miR-145-3p	hsa-mir-145	GGAUUCCUGGAAAUACUGUUCU	69	up	68
hsa-miR-145-5p	hsa-mir-145	GUCCAGUUUUCCCAGGAAUCCCU	1.89286	up	158	83
hsa-miR-146a-5p	hsa-mir-146a	UGAGAACUGAAUUCCAUGGGUU	1.12669	up	2418	2146
hsa-miR-146b-5p	hsa-mir-146b	UGAGAACUGAAUUCCAUAGGCUG	1.29609	up	927	715
hsa-miR-148a-3p	hsa-mir-148a	UCAGUGCACUACAGAACUUUGU	2.26879	up	39054	17213
hsa-miR-148a-5p	hsa-mir-148a	AAAGUUCUGAGACACUCCGACU	46	up	45
hsa-miR-148b-3p	hsa-mir-148b	UCAGUGCAUCACAGAACUUUGU	-1.82543	down	927	1693
hsa-miR-150-5p	hsa-mir-150	UCUCCCAACCCUUGUACCAGUG	1.37379	up	565	411
hsa-miR-151a-3p	hsa-mir-151a	CUAGACUGAAGCUCCUUGAGG	-1.71078	down	407	697
hsa-miR-151a-5p	hsa-mir-151a	UCGAGGAGCUCACAGUCUAGU	-34	down		33
hsa-miR-152-3p	hsa-mir-152	UCAGUGCAUGACAGAACUUGG	3.9749	up	949	238
hsa-miR-15a-5p	hsa-mir-15a	UAGCAGCACAUAAUGGUUUGUG	-126	down		125
hsa-miR-15b-5p	hsa-mir-15b	UAGCAGCACAUCAUGGUUUACA	-1.65217	down	68	113
hsa-miR-16-5p	hsa-mir-16-1	UAGCAGCACGUAAAUAUUGGCG	-1.59535	down	644	1028
hsa-miR-16-5p	hsa-mir-16-2	UAGCAGCACGUAAAUAUUGGCG	-1.59535	down	644	1028
hsa-miR-17-3p	hsa-mir-17	ACUGCAGUGAAGGCACUUGUAG	-67	down		66
hsa-miR-17-5p	hsa-mir-17	CAAAGUGCUUACAGUGCAGGUAG	2.60365	up	3277	1258
hsa-miR-181a-2-3p	hsa-mir-181a-2	ACCACUGACCGUUGACUGUACC	-19	down		18
hsa-miR-181a-3p	hsa-mir-181a-1	ACCAUCGACCGUUGAUUGUACC	46	up	45
hsa-miR-181a-5p	hsa-mir-181a-2	AACAUUCAACGCUGUCGGUGAGU	1.97436	up	153	77
hsa-miR-181a-5p	hsa-mir-181a-1	AACAUUCAACGCUGUCGGUGAGU	1.97436	up	153	77
hsa-miR-181b-5p	hsa-mir-181b-1	AACAUUCAUUGCUGUCGGUGGGU	-11	down		10
hsa-miR-181b-5p	hsa-mir-181b-2	AACAUUCAUUGCUGUCGGUGGGU	-11	down		10
hsa-miR-181c-3p	hsa-mir-181c	AACCAUCGACCGUUGAGUGGAC	-10	down		9
hsa-miR-181d-5p	hsa-mir-181d	AACAUUCAUUGUUGUCGGUGGGU	9.57895	up	181	18
hsa-miR-182-5p	hsa-mir-182	UUUGGCAAUGGUAGAACUCACACU	-19	down		18
hsa-miR-183-5p	hsa-mir-183	UAUGGCACUGGUAGAAUUCACU	-31	down		30
hsa-miR-185-5p	hsa-mir-185	UGGAGAGAAAGGCAGUUCCUGA	-1.67689	down	1695	2843
hsa-miR-186-5p	hsa-mir-186	CAAAGAAUUCUCCUUUUGGGCU	2.80403	up	972	346
hsa-miR-18a-5p	hsa-mir-18a	UAAGGUGCAUCUAGUGCAGAUAG	1.35821	up	90	66
hsa-miR-191-5p	hsa-mir-191	CAACGGAAUCCCAAAAGCAGCUG	3.69	up	19663	5328
hsa-miR-192-5p	hsa-mir-192	CUGACCUAUGAAUUGACAGCC	3.64476	up	1774	486
hsa-miR-193a-5p	hsa-mir-193a	UGGGUCUUUGCGGGCGAGAUGA	-323	down		322
hsa-miR-193b-3p	hsa-mir-193b	AACUGGCCCUCAAAGUCCCGCU	46	up	45
hsa-miR-194-5p	hsa-mir-194-1	UGUAACAGCAACUCCAUGUGGA	-16	down		15
hsa-miR-194-5p	hsa-mir-194-2	UGUAACAGCAACUCCAUGUGGA	-16	down		15
hsa-miR-195-3p	hsa-mir-195	CCAAUAUUGGCUGUGCUGCUCC	-19	down		18
hsa-miR-195-5p	hsa-mir-195	UAGCAGCACAGAAAUAUUGGC	46	up	45
hsa-miR-197-3p	hsa-mir-197	UUCACCACCUUCUCCACCCAGC	-78	down		77
hsa-miR-199a-3p	hsa-mir-199a-1	ACAGUAGUCUGCACAUUGGUUA	-2.10662	down	271	572
hsa-miR-199a-3p	hsa-mir-199a-2	ACAGUAGUCUGCACAUUGGUUA	-2.10662	down	271	572
hsa-miR-199a-5p	hsa-mir-199a-1	CCCAGUGUUCAGACUACCUGUUC	-3.19565	down	45	146
hsa-miR-199a-5p	hsa-mir-199a-2	CCCAGUGUUCAGACUACCUGUUC	-3.19565	down	45	146
hsa-miR-199b-3p	hsa-mir-199b	ACAGUAGUCUGCACAUUGGUUA	-2.10662	down	271	572
hsa-miR-199b-5p	hsa-mir-199b	CCCAGUGUUUAGACUAUCUGUUC	-93	down		92
hsa-miR-19a-3p	hsa-mir-19a	UGUGCAAAUCUAUGCAAAACUGA	-239	down		238
hsa-miR-19b-3p	hsa-mir-19b-1	UGUGCAAAUCCAUGCAAAACUGA	-1.7767	down	102	182
hsa-miR-19b-3p	hsa-mir-19b-2	UGUGCAAAUCCAUGCAAAACUGA	-1.7767	down	102	182
hsa-miR-200a-3p	hsa-mir-200a	UAACACUGUCUGGUAACGAUGU	1.84	up	45	24
hsa-miR-200b-3p	hsa-mir-200b	UAAUACUGCCUGGUAAUGAUGA	1.48387	up	45	30
hsa-miR-200c-3p	hsa-mir-200c	UAAUACUGCCGGGUAAUGAUGGA	1.84	up	45	24
hsa-miR-203a-3p	hsa-mir-203a	GUGAAAUGUUUAGGACCACUAG	4.46154	up	57	12
hsa-miR-206	hsa-mir-206	UGGAAUGUAAGGAAGUGUGUGG	3.28391	up	1040	316
hsa-miR-20a-5p	hsa-mir-20a	UAAAGUGCUUAUAGUGCAGGUAG	1.57316	up	4407	2801
hsa-miR-20b-5p	hsa-mir-20b	CAAAGUGCUCAUAGUGCAGGUAG	-61	down		60
hsa-miR-21-3p	hsa-mir-21	CAACACCAGUCGAUGGGCUGU	-19	down		18
hsa-miR-21-5p	hsa-mir-21	UAGCUUAUCAGACUGAUGUUGA	1.1528	up	13549	11753
hsa-miR-210-3p	hsa-mir-210	CUGUGCGUGUGACAGCGGCUGA	-3.97802	down	90	361
hsa-miR-2110	hsa-mir-2110	UUGGGGAAACGGCCGCUGAGUG	-114	down		113
hsa-miR-22-3p	hsa-mir-22	AAGCUGCCAGUUGAAGAACUGU	2.84927	up	10396	3648
hsa-miR-22-5p	hsa-mir-22	AGUUCUUCAGUGGCAAGCUUUA	8.76923	up	113	12
hsa-miR-221-3p	hsa-mir-221	AGCUACAUUGUCUGCUGGGUUUC	1.11765	up	170	152
hsa-miR-221-5p	hsa-mir-221	ACCUGGCAUACAAUGUAGAUUU	-10	down		9
hsa-miR-222-3p	hsa-mir-222	AGCUACAUCUGGCUACUGGGU	-61	down		60
hsa-miR-223-3p	hsa-mir-223	UGUCAGUUUGUCAAAUACCCCA	-7.2649	down	452	3290
hsa-miR-223-5p	hsa-mir-223	CGUGUAUUUGACAAGCUGAGUU	-84	down		83
hsa-miR-2355-3p	hsa-mir-2355	AUUGUCCUUGCUGUUUGGAGAU	-25	down		24
hsa-miR-23a-3p	hsa-mir-23a	AUCACAUUGCCAGGGAUUUCC	2.43614	up	2803	1150
hsa-miR-23a-5p	hsa-mir-23a	GGGGUUCCUGGGGAUGGGAUUU	-25	down		24
hsa-miR-23b-3p	hsa-mir-23b	AUCACAUUGCCAGGGAUUACCAC	-19	down		18
hsa-miR-24-3p	hsa-mir-24-1	UGGCUCAGUUCAGCAGGAACAG	2.68041	up	2599	969
hsa-miR-24-3p	hsa-mir-24-2	UGGCUCAGUUCAGCAGGAACAG	2.68041	up	2599	969
hsa-miR-25-3p	hsa-mir-25	CAUUGCACUUGUCUCGGUCUGA	1.79674	up	5515	3069
hsa-miR-25-5p	hsa-mir-25	AGGCGGAGACUUGGGCAAUUG	-31	down		30
hsa-miR-26a-5p	hsa-mir-26a-1	UUCAAGUAAUCCAGGAUAGGCU	2.74572	up	18928	6893
hsa-miR-26a-5p	hsa-mir-26a-2	UUCAAGUAAUCCAGGAUAGGCU	2.74572	up	18928	6893
hsa-miR-26b-5p	hsa-mir-26b	UUCAAGUAAUUCAGGAUAGGU	1.54947	up	1017	656
hsa-miR-27a-3p	hsa-mir-27a	UUCACAGUGGCUAAGUUCCGC	-1.06843	down	452	483
hsa-miR-27a-5p	hsa-mir-27a	AGGGCUUAGCUGCUUGUGAGCA	-37	down		36
hsa-miR-27b-3p	hsa-mir-27b	UUCACAGUGGCUAAGUUCUGC	2.33044	up	4294	1842
hsa-miR-28-3p	hsa-mir-28	CACUAGAUUGUGAGCUCCUGGA	-2.51754	down	113	286
hsa-miR-28-5p	hsa-mir-28	AAGGAGCUCACAGUCUAUUGAG	-31	down		30
hsa-miR-29a-3p	hsa-mir-29a	UAGCACCAUCUGAAAUCGGUUA	2.05099	up	723	352
hsa-miR-29b-3p	hsa-mir-29b-1	UAGCACCAUUUGAAAUCAGUGUU	-37	down		36
hsa-miR-29b-3p	hsa-mir-29b-2	UAGCACCAUUUGAAAUCAGUGUU	-37	down		36
hsa-miR-29c-3p	hsa-mir-29c	UAGCACCAUUUGAAAUCGGUUA	-150	down		149
hsa-miR-30a-3p	hsa-mir-30a	CUUUCAGUCGGAUGUUUGCAGC	4.41935	up	136	30
hsa-miR-30a-5p	hsa-mir-30a	UGUAAACAUCCUCGACUGGAAG	4.14376	up	2622	632
hsa-miR-30b-5p	hsa-mir-30b	UGUAAACAUCCUACACUCAGCU	1.36052	up	633	465
hsa-miR-30c-5p	hsa-mir-30c-2	UGUAAACAUCCUACACUCUCAGC	3.33444	up	1006	301
hsa-miR-30c-5p	hsa-mir-30c-1	UGUAAACAUCCUACACUCUCAGC	3.33444	up	1006	301
hsa-miR-30d-5p	hsa-mir-30d	UGUAAACAUCCCCGACUGGAAG	2.85076	up	3571	1252
hsa-miR-30e-3p	hsa-mir-30e	CUUUCAGUCGGAUGUUUACAGC	-2.51572	down	158	399
hsa-miR-30e-5p	hsa-mir-30e	UGUAAACAUCCUUGACUGGAAG	1.00493	up	407	405
hsa-miR-3150b-3p	hsa-mir-3150b	UGAGGAGAUCGUCGAGGUUGG	-43	down		42
hsa-miR-3198	hsa-mir-3198-1	GUGGAGUCCUGGGGAAUGGAGA	2.07143	up	57	27
hsa-miR-3198	hsa-mir-3198-2	GUGGAGUCCUGGGGAAUGGAGA	2.07143	up	57	27
hsa-miR-32-5p	hsa-mir-32	UAUUGCACAUUACUAAGUUGCA	-19	down		18
hsa-miR-320a-3p	hsa-mir-320a	AAAAGCUGGGUUGAGAGGGCGA	-8.14086	down	18329	149221
hsa-miR-320b	hsa-mir-320b-1	AAAAGCUGGGUUGAGAGGGCAA	-16	down		15
hsa-miR-320b	hsa-mir-320b-2	AAAAGCUGGGUUGAGAGGGCAA	-16	down		15
hsa-miR-320c	hsa-mir-320c-1	AAAAGCUGGGUUGAGAGGGU	-10	down		9
hsa-miR-320c	hsa-mir-320c-2	AAAAGCUGGGUUGAGAGGGU	-10	down		9
hsa-miR-326	hsa-mir-326	CCUCUGGGCCCUUCCUCCAG	-43	down		42
hsa-miR-328-3p	hsa-mir-328	CUGGCCCUCUCUGCCCUUCCGU	3.36905	up	565	167
hsa-miR-330-3p	hsa-mir-330	GCAAAGCACACGGCCUGCAGAGA	-13	down		12
hsa-miR-330-5p	hsa-mir-330	UCUCUGGGCCUGUGUCUUAGGC	-19	down		18
hsa-miR-335-3p	hsa-mir-335	UUUUUCAUUAUUGCUCCUGACC	-13	down		12
hsa-miR-339-3p	hsa-mir-339	UGAGCGCCUCGACGACAGAGCCG	-25	down		24
hsa-miR-339-5p	hsa-mir-339	UCCCUGUCCUCCAGGAGCUCACG	1.75641	up	136	77
hsa-miR-340-5p	hsa-mir-340	UUAUAAAGCAAUGAGACUGAUU	-2.51163	down	429	1079
hsa-miR-342-3p	hsa-mir-342	UCUCACACAGAAAUCGCACCCGU	3.53846	up	45	12
hsa-miR-361-3p	hsa-mir-361	UCCCCCAGGUGUGAUUCUGAUUU	-61	down		60
hsa-miR-361-5p	hsa-mir-361	UUAUCAGAAUCUCCAGGGGUAC	3.63158	up	68	18
hsa-miR-3613-5p	hsa-mir-3613	UGUUGUACUUUUUUUUUUGUUC	-222	down		221
hsa-miR-3617-5p	hsa-mir-3617	AAAGACAUAGUUGCAAGAUGGG	-13	down		12
hsa-miR-363-3p	hsa-mir-363	AAUUGCACGGUAUCCAUCUGUA	1.48387	up	45	30
hsa-miR-3661	hsa-mir-3661	UGACCUGGGACUCGGACAGCUG	-19	down		18
hsa-miR-370-3p	hsa-mir-370	GCCUGCUGGGGUGGAACCUGGU	-3	down	45	137
hsa-miR-374a-3p	hsa-mir-374a	CUUAUCAGAUUGUAUUGUAAUU	-168	down		167
hsa-miR-374a-5p	hsa-mir-374a	UUAUAAUACAACCUGAUAAGUG	-144	down		143
hsa-miR-374b-5p	hsa-mir-374b	AUAUAAUACAACCUGCUAAGUG	-156	down		155
hsa-miR-375-3p	hsa-mir-375	UUUGUUCGUUCGGCUCGCGUGA	3.63158	up	68	18
hsa-miR-376c-3p	hsa-mir-376c	AACAUAGAGGAAAUUCCACGU	-19	down		18
hsa-miR-378a-3p	hsa-mir-378a	ACUGGACUUGGAGUCAGAAGGC	3.29116	up	4317	1311
hsa-miR-378a-5p	hsa-mir-378a	CUCCUGACUCCAGGUCCUGUGU	-13	down		12
hsa-miR-378d	hsa-mir-378d-2	ACUGGACUUGGAGUCAGAAA	-1.91429	down	34	66
hsa-miR-378d	hsa-mir-378d-1	ACUGGACUUGGAGUCAGAAA	-1.91429	down	34	66
hsa-miR-378g	hsa-mir-378g	ACUGGGCUUGGAGUCAGAAG	-19	down		18
hsa-miR-379-5p	hsa-mir-379	UGGUAGACUAUGGAACGUAGG	4.78947	up	90	18
hsa-miR-381-3p	hsa-mir-381	UAUACAAGGGCAAGCUCUCUGU	69	up	68
hsa-miR-382-5p	hsa-mir-382	GAAGUUGUUCGUGGUGGAUUCG	2.45946	up	90	36
hsa-miR-409-3p	hsa-mir-409	GAAUGUUGCUCGGUGAACCCCU	4.78947	up	90	18
hsa-miR-423-3p	hsa-mir-423	AGCUCGGUCUGAGGCCCCUCAGU	-1.14826	down	633	727
hsa-miR-423-5p	hsa-mir-423	UGAGGGGCAGAGAGCGAGACUUU	-1.15733	down	927	1073
hsa-miR-424-5p	hsa-mir-424	CAGCAGCAAUUCAUGUUUUGAA	-19	down		18
hsa-miR-425-3p	hsa-mir-425	AUCGGGAAUGUCGUGUCCGCCC	-37	down		36
hsa-miR-425-5p	hsa-mir-425	AAUGACACGAUCACUCCCGUUGA	-1.47826	down	68	101
hsa-miR-4286	hsa-mir-4286	ACCCCACUCCUGGUACC	-13	down		12
hsa-miR-4430	hsa-mir-4430	AGGCUGGAGUGAGCGGAG	-31	down		30
hsa-miR-4470	hsa-mir-4470	UGGCAAACGUGGAAGCCGAGA	-37	down		36
hsa-miR-4508	hsa-mir-4508	GCGGGGCUGGGCGCGCG	-19	down		18
hsa-miR-450a-5p	hsa-mir-450a-1	UUUUGCGAUGUGUUCCUAAUAU	-17	down		16
hsa-miR-450a-5p	hsa-mir-450a-2	UUUUGCGAUGUGUUCCUAAUAU	-17	down		16
hsa-miR-450b-5p	hsa-mir-450b	UUUUGCAAUAUGUUCCUGAAUA	-13	down		12
hsa-miR-451a	hsa-mir-451a	AAACCGUUACCAUUACUGAGUU	-2.84116	down	723	2056
hsa-miR-455-5p	hsa-mir-455	UAUGUGCCUUUGGACUACAUCG	7.32258	up	226	30
hsa-miR-4646-5p	hsa-mir-4646	ACUGGGAAGAGGAGCUGAGGGA	-13	down		12
hsa-miR-4665-5p	hsa-mir-4665	CUGGGGGACGCGUGAGCGCGAGC	-43	down		42
hsa-miR-4677-3p	hsa-mir-4677	UCUGUGAGACCAAAGAACUACU	-13	down		12
hsa-miR-4741	hsa-mir-4741	CGGGCUGUCCGGAGGGGUCGGCU	-19	down		18
hsa-miR-483-5p	hsa-mir-483	AAGACGGGAGGAAAGAAGGGAG	272	up	271
hsa-miR-484	hsa-mir-484	UCAGGCUCAGUCCCCUCCCGAU	46	up	45
hsa-miR-486-5p	hsa-mir-486-1	UCCUGUACUGAGCUGCCCCGAG	1.92778	up	2268	1176
hsa-miR-486-5p	hsa-mir-486-2	UCCUGUACUGAGCUGCCCCGAG	1.92778	up	2268	1176
hsa-miR-490-3p	hsa-mir-490	CAACCUGGAGGACUCCAUGCUG	-880	down		879
hsa-miR-493-5p	hsa-mir-493	UUGUACAUGGUAGGCUUUCAUU	-13	down		12
hsa-miR-495-3p	hsa-mir-495	AAACAAACAUGGUGCACUUCUU	-19	down		18
hsa-miR-499a-5p	hsa-mir-499a	UUAAGACUUGCAGUGAUGUUU	2.32	up	57	24
hsa-miR-500a-3p	hsa-mir-500a	AUGCACCUGGGCAAGGAUUCUG	-13	down		12
hsa-miR-501-3p	hsa-mir-501	AAUGCACCCGGGCAAGGAUUCU	-37	down		36
hsa-miR-505-5p	hsa-mir-505	GGGAGCCAGGAAGUAUUGAUGU	-31	down		30
hsa-miR-509-3-5p	hsa-mir-509-3	UACUGCAGACGUGGCAAUCAUG	-25	down		24
hsa-miR-5187-5p	hsa-mir-5187	UGGGAUGAGGGAUUGAAGUGGA	-19	down		18
hsa-miR-532-5p	hsa-mir-532	CAUGCCUUGAGUGUAGGACCGU	-2.49451	down	90	226
hsa-miR-542-3p	hsa-mir-542	UGUGACAGAUUGAUAACUGAAA	-46	down		45
hsa-miR-548e-3p	hsa-mir-548e	AAAAACUGAGACUACUUUUGCA	-49	down		48
hsa-miR-551a	hsa-mir-551a	GCGACCCACUCUUGGUUUCCA	-25	down		24
hsa-miR-5588-5p	hsa-mir-5588	ACUGGCAUUAGUGGGACUUUU	-19	down		18
hsa-miR-574-3p	hsa-mir-574	CACGCUCAUGCACACACCCACA	1.48387	up	45	30
hsa-miR-574-5p	hsa-mir-574	UGAGUGUGUGUGUGUGAGUGUGU	-132	down		131
hsa-miR-576-3p	hsa-mir-576	AAGAUGUGGAAAAAUUGGAAUC	-19	down		18
hsa-miR-590-3p	hsa-mir-590	UAAUUUUAUGUAUAAGCUAGU	-13	down		12
hsa-miR-625-3p	hsa-mir-625	GACUAUAGAACUUUCCCCCUCA	-13	down		12
hsa-miR-627-5p	hsa-mir-627	GUGAGUCUCUAAGAAAAGAGGA	-13	down		12
hsa-miR-629-5p	hsa-mir-629	UGGGUUUACGUUGGGAGAACU	-4.32759	down	57	250
hsa-miR-6515-5p	hsa-mir-6515	UUGGAGGGUGUGGAAGACAUC	-61	down		60
hsa-miR-652-3p	hsa-mir-652	AAUGGCGCCACUAGGGUUGUG	-6.70248	down	362	2432
hsa-miR-671-5p	hsa-mir-671	AGGAAGCCCUGGAGGGGCUGGAG	2.32	up	57	24
hsa-miR-6734-5p	hsa-mir-6734	UUGAGGGGAGAAUGAGGUGGAGA	-25	down		24
hsa-miR-6735-3p	hsa-mir-6735	AGGCCUGUGGCUCCUCCCUCAG	-13	down		12
hsa-miR-6786-3p	hsa-mir-6786	UGACGCCCCUUCUGAUUCUGCCU	46	up	45
hsa-miR-6842-3p	hsa-mir-6842	UUGGCUGGUCUCUGCUCCGCAG	-16	down		15
hsa-miR-6852-5p	hsa-mir-6852	CCCUGGGGUUCUGAGGACAUG	-13	down		12
hsa-miR-7-5p	hsa-mir-7-1	UGGAAGACUAGUGAUUUUGUUGUU	-2.31481	down	53	124
hsa-miR-7-5p	hsa-mir-7-2	UGGAAGACUAGUGAUUUUGUUGUU	-2.31481	down	53	124
hsa-miR-7-5p	hsa-mir-7-3	UGGAAGACUAGUGAUUUUGUUGUU	-2.31481	down	53	124
hsa-miR-708-5p	hsa-mir-708	AAGGAGCUUACAAUCUAGCUGGG	-25	down		24
hsa-miR-744-5p	hsa-mir-744	UGCGGGGCUAGGGCUAACAGCA	1.30208	up	249	191
hsa-miR-766-3p	hsa-mir-766	ACUCCAGCCCCACAGCCUCAGC	-25	down		24
hsa-miR-769-5p	hsa-mir-769	UGAGACCUCUGGGUUCUGAGCU	1.02941	up	34	33
hsa-miR-7974	hsa-mir-7974	AGGCUGUGAUGCUCUCCUGAGCCC	-13	down		12
hsa-miR-873-3p	hsa-mir-873	GGAGACUGAUGAGUUCCCGGGA	-13	down		12
hsa-miR-873-5p	hsa-mir-873	GCAGGAACUUGUGAGUCUCCU	-13	down		12
hsa-miR-92a-3p	hsa-mir-92a-1	UAUUGCACUUGUCCCGGCCUGU	2.00554	up	2893	1442
hsa-miR-92a-3p	hsa-mir-92a-2	UAUUGCACUUGUCCCGGCCUGU	2.00554	up	2893	1442
hsa-miR-93-5p	hsa-mir-93	CAAAGUGCUGUUCGUGCAGGUAG	1.91922	up	1876	977
hsa-miR-941	hsa-mir-941-1	CACCCGGCUGUGUGCACAUGUGC	-12	down		11
hsa-miR-941	hsa-mir-941-2	CACCCGGCUGUGUGCACAUGUGC	-12	down		11
hsa-miR-941	hsa-mir-941-3	CACCCGGCUGUGUGCACAUGUGC	-12	down		11
hsa-miR-941	hsa-mir-941-4	CACCCGGCUGUGUGCACAUGUGC	-12	down		11
hsa-miR-941	hsa-mir-941-5	CACCCGGCUGUGUGCACAUGUGC	-12	down		11
hsa-miR-98-5p	hsa-mir-98	UGAGGUAGUAAGUUGUAUUGUU	-1.76316	down	113	200
hsa-miR-99a-5p	hsa-mir-99a	AACCCGUAGAUCCGAUCUUGUG	17.8947	up	339	18
hsa-miR-99b-5p	hsa-mir-99b	CACCCGUAGAACCGACCUUGCG	-1.05882	down	203	215
hsa-miR-novel-chr10_1124	hsa-mir-novel-chr10_1124	ACUCGGCGUGGCGUCGGUCGUGG	-6.53431	down	203	1332
hsa-miR-novel-chr10_220	hsa-mir-novel-chr10_220	UGGCUGGCUGCUCCGGGCACUGG	-19	down		18
hsa-miR-novel-chr11_1678	hsa-mir-novel-chr11_1678	AGGAAAUGGCUGGAGCCUG	-37	down		36
hsa-miR-novel-chr11_2543	hsa-mir-novel-chr11_2543	CUGACCUAUGAAUUGACAGC	3.77273	up	746	197
hsa-miR-novel-chr11_2733	hsa-mir-novel-chr11_2733	CGGUGGGGGUAGGGGGUG	-19	down		18
hsa-miR-novel-chr14_5271	hsa-mir-novel-chr14_5271	GAAGCUCAGAGGGCUCUGAUUC	-70	down		69
hsa-miR-novel-chr15_6007	hsa-mir-novel-chr15_6007	UGGACUUGGAGUCAGAAG	-57	down		56
hsa-miR-novel-chr15_6553	hsa-mir-novel-chr15_6553	GGGGCUGGAGAGAUGGC	4.01042	up	384	95
hsa-miR-novel-chr15_6643	hsa-mir-novel-chr15_6643	UGGGUUUACGUUGGGAGAACUU	-12.7586	down	57	739
hsa-miR-novel-chr16_7074	hsa-mir-novel-chr16_7074	AAAAGCUGAGAAAGAGGA	-19	down		18
hsa-miR-novel-chr16_7839	hsa-mir-novel-chr16_7839	GCAGGACGGUGGCCAUG	1.24324	up	45	36
hsa-miR-novel-chr17_8506	hsa-mir-novel-chr17_8506	UAGCUUAUCAGACUGAUGUUGAC	-1.47174	down	24364	35858
hsa-miR-novel-chr17_8838	hsa-mir-novel-chr17_8838	AGGGAGGACCAGAAGGACUGGGG	69	up	68
hsa-miR-novel-chr17_9261	hsa-mir-novel-chr17_9261	UACCCUGUAGAUCCGAAUUUGU	3.08317	up	1593	516
hsa-miR-novel-chr18_9936	hsa-mir-novel-chr18_9936	CCCGGGAGUGUGACCCAGAG	-13	down		12
hsa-miR-novel-chr19_10425	hsa-mir-novel-chr19_10425	ACCAUCGACCGUUGAGUGGAC	3.05263	up	57	18
hsa-miR-novel-chr19_10726	hsa-mir-novel-chr19_10726	UGAGACCUCUGGGUUCUGAG	-1104	down		1103
hsa-miR-novel-chr19_11281	hsa-mir-novel-chr19_11281	GGGAAGGUGGCUCGGGGGG	-37	down		36
hsa-miR-novel-chr19_11346	hsa-mir-novel-chr19_11346	AGAAGGGAGGGUGAGACCUGG	-19	down		18
hsa-miR-novel-chr19_11567	hsa-mir-novel-chr19_11567	UGAGGAGGAUCUGAAGGAUUGG	-49	down		48
hsa-miR-novel-chr1_12335	hsa-mir-novel-chr1_12335	UGUGGCCCCAGCGUGCUGUGG	-13	down		12
hsa-miR-novel-chr1_12353	hsa-mir-novel-chr1_12353	UGUGGCCCCAGCGUGCUGUGG	-13	down		12
hsa-miR-novel-chr1_14381	hsa-mir-novel-chr1_14381	AACAUUCAUUGCUGUCGGUGG	2.76	up	68	24
hsa-miR-novel-chr20_14682	hsa-mir-novel-chr20_14682	UUGUGAAUGGGGGAACAUAG	-25	down		24
hsa-miR-novel-chr20_14983	hsa-mir-novel-chr20_14983	UUGGUCCCCUUCAACCAGCUGU	3.71311	up	452	121
hsa-miR-novel-chr22_16369	hsa-mir-novel-chr22_16369	AGCUGCUGGUCUGGAAACUCAGU	-19	down		18
hsa-miR-novel-chr22_16451	hsa-mir-novel-chr22_16451	AGGCCAGGGUGGGACUGGGA	-25	down		24
hsa-miR-novel-chr2_17026	hsa-mir-novel-chr2_17026	AUCUCAUGCCUGUGCUCCGGAU	-15	down		14
hsa-miR-novel-chr2_17520	hsa-mir-novel-chr2_17520	CUGCUGGGAGAACUGGAG	-13	down		12
hsa-miR-novel-chr2_17740	hsa-mir-novel-chr2_17740	UACCCUGUAGAACCGAAUUUGU	3.80677	up	1910	501
hsa-miR-novel-chr2_17891	hsa-mir-novel-chr2_17891	UGCGUGGGAGGAAGGACCAGGC	-13	down		12
hsa-miR-novel-chr3_19235	hsa-mir-novel-chr3_19235	AACUGUGGAGUGAGAAG	-19	down		18
hsa-miR-novel-chr3_19892	hsa-mir-novel-chr3_19892	GGGGCCGAGGGAGCGAG	679	up	678
hsa-miR-novel-chr3_19986	hsa-mir-novel-chr3_19986	UGGGAGGACUUGAAGAAGACU	-19	down		18
hsa-miR-novel-chr3_20035	hsa-mir-novel-chr3_20035	ACUUCUGCCUGUGGGUCUGAG	-19	down		18
hsa-miR-novel-chr3_20465	hsa-mir-novel-chr3_20465	UGGAGAGCUGUUGAAAUGCAGA	-19	down		18
hsa-miR-novel-chr4_20929	hsa-mir-novel-chr4_20929	GGGGGAAUGGCUGAGGAGAUGGA	-19	down		18
hsa-miR-novel-chr5_22142	hsa-mir-novel-chr5_22142	AAAGAACUUUGAAAAGAG	7.21053	up	136	18
hsa-miR-novel-chr5_22357	hsa-mir-novel-chr5_22357	GGGGAUGUAGCUCAGUGGU	1.84	up	45	24
hsa-miR-novel-chr5_23088	hsa-mir-novel-chr5_23088	GCUGGGGAGGUGAACUGGUG	-37	down		36
hsa-miR-novel-chr7_25349	hsa-mir-novel-chr7_25349	GUGAGGGCUCUGAGGAUGAACC	-19	down		18
hsa-miR-novel-chr7_25390	hsa-mir-novel-chr7_25390	AGUUGGUCCGAGUGUUGUGG	-1.09118	down	339	370
hsa-miR-novel-chr7_25414	hsa-mir-novel-chr7_25414	AGGAAGCCCUGGAGGGGCUGGAGG	2.36207	up	136	57
hsa-miR-novel-chr7_25437	hsa-mir-novel-chr7_25437	UGGAAUGGCCUGAAGGUGGA	-13	down		12
hsa-miR-novel-chr7_25490	hsa-mir-novel-chr7_25490	UGAGCGCCUCGACGACAGAGC	-1.26087	down	45	57
hsa-miR-novel-chr7_26019	hsa-mir-novel-chr7_26019	UUUGGCAAUGGUAGAACUCACA	-46	down		45
hsa-miR-novel-chr8_26363	hsa-mir-novel-chr8_26363	AAAAGCUGGGUUGAGAGG	-17	down		16
hsa-miR-novel-chr8_27099	hsa-mir-novel-chr8_27099	GCUUGGAGAAUGAAGGAG	91	up	90
hsa-miR-novel-chr9_27523	hsa-mir-novel-chr9_27523	AUCACAUUGCCAGGGAUU	4	up	83	20
hsa-miR-novel-chr9_28240	hsa-mir-novel-chr9_28240	ACAGUAGUCUGCACAUUGGUU	1.82184	up	633	347
hsa-miR-novel-chrX_29044	hsa-mir-novel-chrX_29044	AGCUACAUUGUCUGCUGGGUUUCA	-10	down		9
hsa-miR-novel-chrX_29247	hsa-mir-novel-chrX_29247	UUUUGCGAUGUGUUCCUAAU	-31	down		30

## Sheet: After-2_vs_Before-2
miRNA expression for After-2 vs Before-2 Column A: Mature miRNA, the mature miRNA name. Column B: Pre-miRNA, the pre-miRNA name. Column C: Sequence, the mature miRNA sequence. Column D: Fold change, fold change between two samples. Column E: Regulation, 'up' indicates up-regulation, and 'down' indicates down-regulation. Column F ~ G: Tag Counts (normalized), the normalized tag counts of the matur…
miRNA Information			Fold change & Regulation		Tag counts (normalized)
mature-miRNA	pre-miRNA	mature-sequence	Fold Change	Regulation	After-2	Before-2
hsa-let-7a-3p	hsa-let-7a-1	CUAUACAAUCUACUGUCUUUC	-12	down		11
hsa-let-7a-3p	hsa-let-7a-3	CUAUACAAUCUACUGUCUUUC	-12	down		11
hsa-let-7a-5p	hsa-let-7a-1	UGAGGUAGUAGGUUGUAUAGUU	-1.68954	down	611	1033
hsa-let-7a-5p	hsa-let-7a-2	UGAGGUAGUAGGUUGUAUAGUU	-1.68954	down	611	1033
hsa-let-7a-5p	hsa-let-7a-3	UGAGGUAGUAGGUUGUAUAGUU	-1.68954	down	611	1033
hsa-let-7b-5p	hsa-let-7b	UGAGGUAGUAGGUUGUGUGGUU	-3.91656	down	754	2956
hsa-let-7c-5p	hsa-let-7c	UGAGGUAGUAGGUUGUAUGGUU	1.43191	up	1040	726
hsa-let-7d-3p	hsa-let-7d	CUAUACGACCUGCUGCCUUUCU	-1.58491	down	52	83
hsa-let-7d-5p	hsa-let-7d	AGAGGUAGUAGGUUGCAUAGUU	1.58363	up	1353	854
hsa-let-7e-5p	hsa-let-7e	UGAGGUAGGAGGUUGUAUAGUU	-107	down		106
hsa-let-7f-5p	hsa-let-7f-1	UGAGGUAGUAGAUUGUAUAGUU	-1.27631	down	3752	4789
hsa-let-7f-5p	hsa-let-7f-2	UGAGGUAGUAGAUUGUAUAGUU	-1.27631	down	3752	4789
hsa-let-7g-5p	hsa-let-7g	UGAGGUAGUAGUUUGUACAGUU	-1.60736	down	6165	9910
hsa-let-7i-5p	hsa-let-7i	UGAGGUAGUAGUUUGUGCUGUU	1.03753	up	11003	10605
hsa-miR-1-3p	hsa-mir-1-2	UGGAAUGUAAAGAAGUAUGUAU	1.40664	up	1483	1054
hsa-miR-1-3p	hsa-mir-1-1	UGGAAUGUAAAGAAGUAUGUAU	1.40664	up	1483	1054
hsa-miR-100-5p	hsa-mir-100	AACCCGUAGAUCCGAACUUGUG	5.3913	up	247	45
hsa-miR-101-3p	hsa-mir-101-1	UACAGUACUGUGAUAACUGAA	-10.7681	down	137	1485
hsa-miR-101-3p	hsa-mir-101-2	UACAGUACUGUGAUAACUGAA	-10.7681	down	137	1485
hsa-miR-103a-3p	hsa-mir-103a-2	AGCAGCAUUGUACAGGGCUAUGA	-2.42328	down	377	915
hsa-miR-103a-3p	hsa-mir-103a-1	AGCAGCAUUGUACAGGGCUAUGA	-2.42328	down	377	915
hsa-miR-106b-3p	hsa-mir-106b	CCGCACUGUGGGUACUUGCUGC	40	up	39
hsa-miR-106b-5p	hsa-mir-106b	UAAAGUGCUGACAGUGCAGAU	-2.25926	down	26	60
hsa-miR-107	hsa-mir-107	AGCAGCAUUGUACAGGGCUAUCA	-31	down		30
hsa-miR-10a-5p	hsa-mir-10a	UACCCUGUAGAUCCGAAUUUGUG	7.625	up	182	23
hsa-miR-10b-5p	hsa-mir-10b	UACCCUGUAGAACCGAAUUUGUG	-12	down		11
hsa-miR-122-5p	hsa-mir-122	UGGAGUGUGACAAUGGUGUUUG	1.63575	up	7036	4301
hsa-miR-1224-5p	hsa-mir-1224	GUGAGGACUCGGGAGGUGG	-16	down		15
hsa-miR-1246	hsa-mir-1246	AAUGGAUUUUUGGAGCAGG	-24	down		23
hsa-miR-125b-5p	hsa-mir-125b-1	UCCCUGAGACCCUAACUUGUGA	-12	down		11
hsa-miR-125b-5p	hsa-mir-125b-2	UCCCUGAGACCCUAACUUGUGA	-12	down		11
hsa-miR-126-3p	hsa-mir-126	UCGUACCGUGAGUAAUAAUGCG	3.68464	up	1366	370
hsa-miR-126-5p	hsa-mir-126	CAUUAUUACUUUUGGUACGCG	1.46992	up	390	265
hsa-miR-1268a	hsa-mir-1268a	CGGGCGUGGUGGUGGGGG	47	up	46
hsa-miR-127-3p	hsa-mir-127	UCGGAUCCGUCUGAGCUUGGCU	4.91667	up	117	23
hsa-miR-1273h-3p	hsa-mir-1273h	CUGCAGACUCGACCUCCCAGGC	-16	down		15
hsa-miR-128-3p	hsa-mir-128-1	UCACAGUGAACCGGUCUCUUU	1.23169	up	722	586
hsa-miR-128-3p	hsa-mir-128-2	UCACAGUGAACCGGUCUCUUU	1.23169	up	722	586
hsa-miR-1288-3p	hsa-mir-1288	UGGACUGCCCUGAUCUGGAGA	-16	down		15
hsa-miR-1307-3p	hsa-mir-1307	ACUCGGCGUGGCGUCGGUCGUG	-1.56522	down	137	215
hsa-miR-130a-3p	hsa-mir-130a	CAGUGCAAUGUUAAAAGGGCAU	-24	down		23
hsa-miR-130b-3p	hsa-mir-130b	CAGUGCAAUGAUGAAAGGGCAU	-16	down		15
hsa-miR-132-3p	hsa-mir-132	UAACAGUCUACAGCCAUGGUCG	21	up	20
hsa-miR-133a-3p	hsa-mir-133a-1	UUUGGUCCCCUUCAACCAGCUG	-14	down		13
hsa-miR-133a-3p	hsa-mir-133a-2	UUUGGUCCCCUUCAACCAGCUG	-14	down		13
hsa-miR-134-5p	hsa-mir-134	UGUGACUGGUUGACCAGAGGGG	-2.0125	down	559	1126
hsa-miR-139-5p	hsa-mir-139	UCUACAGUGCACGUGUCUCCAGU	27	up	26
hsa-miR-140-3p	hsa-mir-140	UACCACAGGGUAGAACCACGG	1.1085	up	377	340
hsa-miR-140-5p	hsa-mir-140	CAGUGGUUUUACCCUAUGGUAG	-1.14794	down	533	612
hsa-miR-142-3p	hsa-mir-142	UGUAGUGUUUCCUACUUUAUGGA	1.29032	up	39	30
hsa-miR-142-5p	hsa-mir-142	CAUAAAGUAGAAAGCACUACU	1.09524	up	91	83
hsa-miR-143-3p	hsa-mir-143	UGAGAUGAAGCACUGUAGCUC	1.60225	up	9260	5779
hsa-miR-144-3p	hsa-mir-144	UACAGUAUAGAUGAUGUACU	-61	down		60
hsa-miR-145-5p	hsa-mir-145	GUCCAGUUUUCCCAGGAAUCCCU	1.15217	up	52	45
hsa-miR-146a-5p	hsa-mir-146a	UGAGAACUGAAUUCCAUGGGUU	-1.36799	down	1105	1512
hsa-miR-146b-5p	hsa-mir-146b	UGAGAACUGAAUUCCAUAGGCUG	-1.71313	down	494	847
hsa-miR-148a-3p	hsa-mir-148a	UCAGUGCACUACAGAACUUUGU	1.28901	up	21095	16365
hsa-miR-148a-5p	hsa-mir-148a	AAAGUUCUGAGACACUCCGACU	-77	down		76
hsa-miR-148b-3p	hsa-mir-148b	UCAGUGCAUCACAGAACUUUGU	-1.63976	down	507	832
hsa-miR-150-5p	hsa-mir-150	UCUCCCAACCCUUGUACCAGUG	-2.09362	down	234	491
hsa-miR-151a-3p	hsa-mir-151a	CUAGACUGAAGCUCCUUGAGG	-1.34483	down	202	272
hsa-miR-152-3p	hsa-mir-152	UCAGUGCAUGACAGAACUUGG	1.23134	up	494	401
hsa-miR-15a-5p	hsa-mir-15a	UAGCAGCACAUAAUGGUUUGUG	-99	down		98
hsa-miR-15b-5p	hsa-mir-15b	UAGCAGCACAUCAUGGUUUACA	1.29032	up	39	30
hsa-miR-16-5p	hsa-mir-16-1	UAGCAGCACGUAAAUAUUGGCG	-1.80636	down	345	624
hsa-miR-16-5p	hsa-mir-16-2	UAGCAGCACGUAAAUAUUGGCG	-1.80636	down	345	624
hsa-miR-17-3p	hsa-mir-17	ACUGCAGUGAAGGCACUUGUAG	-39	down		38
hsa-miR-17-5p	hsa-mir-17	CAAAGUGCUUACAGUGCAGGUAG	-1.09702	down	1040	1141
hsa-miR-181a-3p	hsa-mir-181a-1	ACCAUCGACCGUUGAUUGUACC	-24	down		23
hsa-miR-181a-5p	hsa-mir-181a-2	AACAUUCAACGCUGUCGGUGAGU	-1.08571	down	104	113
hsa-miR-181a-5p	hsa-mir-181a-1	AACAUUCAACGCUGUCGGUGAGU	-1.08571	down	104	113
hsa-miR-181b-5p	hsa-mir-181b-1	AACAUUCAUUGCUGUCGGUGGGU	23	up	22
hsa-miR-181b-5p	hsa-mir-181b-2	AACAUUCAUUGCUGUCGGUGGGU	23	up	22
hsa-miR-181c-5p	hsa-mir-181c	AACAUUCAACCUGUCGGUGAGU	21	up	20
hsa-miR-181d-5p	hsa-mir-181d	AACAUUCAUUGUUGUCGGUGGGU	1	up	26	26
hsa-miR-182-5p	hsa-mir-182	UUUGGCAAUGGUAGAACUCACACU	-50	down		49
hsa-miR-185-5p	hsa-mir-185	UGGAGAGAAAGGCAGUUCCUGA	-1.76243	down	1548	2729
hsa-miR-186-5p	hsa-mir-186	CAAAGAAUUCUCCUUUUGGGCU	1.04823	up	325	310
hsa-miR-18a-5p	hsa-mir-18a	UAAGGUGCAUCUAGUGCAGAUAG	3.3125	up	52	15
hsa-miR-191-5p	hsa-mir-191	CAACGGAAUCCCAAAAGCAGCUG	1.20597	up	8688	7204
hsa-miR-192-5p	hsa-mir-192	CUGACCUAUGAAUUGACAGCC	1.42609	up	819	574
hsa-miR-193a-5p	hsa-mir-193a	UGGGUCUUUGCGGGCGAGAUGA	1.10329	up	234	212
hsa-miR-194-5p	hsa-mir-194-1	UGUAACAGCAACUCCAUGUGGA	-27	down		26
hsa-miR-194-5p	hsa-mir-194-2	UGUAACAGCAACUCCAUGUGGA	-27	down		26
hsa-miR-195-5p	hsa-mir-195	UAGCAGCACAGAAAUAUUGGC	-16	down		15
hsa-miR-199a-3p	hsa-mir-199a-1	ACAGUAGUCUGCACAUUGGUUA	-3.01205	down	82	249
hsa-miR-199a-3p	hsa-mir-199a-2	ACAGUAGUCUGCACAUUGGUUA	-3.01205	down	82	249
hsa-miR-199a-5p	hsa-mir-199a-1	CCCAGUGUUCAGACUACCUGUUC	-54	down		53
hsa-miR-199a-5p	hsa-mir-199a-2	CCCAGUGUUCAGACUACCUGUUC	-54	down		53
hsa-miR-199b-3p	hsa-mir-199b	ACAGUAGUCUGCACAUUGGUUA	-3.01205	down	82	249
hsa-miR-199b-5p	hsa-mir-199b	CCCAGUGUUUAGACUAUCUGUUC	-73	down		72
hsa-miR-19a-3p	hsa-mir-19a	UGUGCAAAUCUAUGCAAAACUGA	-39	down		38
hsa-miR-19b-3p	hsa-mir-19b-1	UGUGCAAAUCCAUGCAAAACUGA	-2.575	down	39	102
hsa-miR-19b-3p	hsa-mir-19b-2	UGUGCAAAUCCAUGCAAAACUGA	-2.575	down	39	102
hsa-miR-200a-3p	hsa-mir-200a	UAACACUGUCUGGUAACGAUGU	1.43478	up	65	45
hsa-miR-200b-3p	hsa-mir-200b	UAAUACUGCCUGGUAAUGAUGA	-16	down		15
hsa-miR-200c-3p	hsa-mir-200c	UAAUACUGCCGGGUAAUGAUGGA	-31	down		30
hsa-miR-203a-3p	hsa-mir-203a	GUGAAAUGUUUAGGACCACUAG	1.35	up	26	19
hsa-miR-206	hsa-mir-206	UGGAAUGUAAGGAAGUGUGUGG	1.81203	up	481	265
hsa-miR-20a-5p	hsa-mir-20a	UAAAGUGCUUAUAGUGCAGGUAG	1.03686	up	1912	1844
hsa-miR-20b-5p	hsa-mir-20b	CAAAGUGCUCAUAGUGCAGGUAG	-46	down		45
hsa-miR-21-3p	hsa-mir-21	CAACACCAGUCGAUGGGCUGU	21	up	20
hsa-miR-21-5p	hsa-mir-21	UAGCUUAUCAGACUGAUGUUGA	-1.41082	down	6542	9230
hsa-miR-210-3p	hsa-mir-210	CUGUGCGUGUGACAGCGGCUGA	-4.65	down	39	185
hsa-miR-2110	hsa-mir-2110	UUGGGGAAACGGCCGCUGAGUG	-160	down		159
hsa-miR-216b-5p	hsa-mir-216b	AAAUCUCUGCAGGCAAAUGUGA	27	up	26
hsa-miR-22-3p	hsa-mir-22	AAGCUGCCAGUUGAAGAACUGU	1.19399	up	5840	4891
hsa-miR-22-5p	hsa-mir-22	AGUUCUUCAGUGGCAAGCUUUA	2.75	up	65	23
hsa-miR-221-3p	hsa-mir-221	AGCUACAUUGUCUGCUGGGUUUC	1.58696	up	72	45
hsa-miR-222-3p	hsa-mir-222	AGCUACAUCUGGCUACUGGGU	-24	down		23
hsa-miR-223-3p	hsa-mir-223	UGUCAGUUUGUCAAAUACCCCA	-2.42717	down	507	1232
hsa-miR-223-5p	hsa-mir-223	CGUGUAUUUGACAAGCUGAGUU	1.6875	up	26	15
hsa-miR-2355-3p	hsa-mir-2355	AUUGUCCUUGCUGUUUGGAGAU	-16	down		15
hsa-miR-23a-3p	hsa-mir-23a	AUCACAUUGCCAGGGAUUUCC	-1.02502	down	1158	1187
hsa-miR-24-3p	hsa-mir-24-1	UGGCUCAGUUCAGCAGGAACAG	1.52757	up	1606	1051
hsa-miR-24-3p	hsa-mir-24-2	UGGCUCAGUUCAGCAGGAACAG	1.52757	up	1606	1051
hsa-miR-25-3p	hsa-mir-25	CAUUGCACUUGUCUCGGUCUGA	1.01824	up	2679	2631
hsa-miR-25-5p	hsa-mir-25	AGGCGGAGACUUGGGCAAUUG	-39	down		38
hsa-miR-26a-5p	hsa-mir-26a-1	UUCAAGUAAUCCAGGAUAGGCU	1.34875	up	9273	6875
hsa-miR-26a-5p	hsa-mir-26a-2	UUCAAGUAAUCCAGGAUAGGCU	1.34875	up	9273	6875
hsa-miR-26b-5p	hsa-mir-26b	UUCAAGUAAUUCAGGAUAGGU	1.18153	up	741	627
hsa-miR-27a-3p	hsa-mir-27a	UUCACAGUGGCUAAGUUCCGC	-1.04601	down	325	340
hsa-miR-27b-3p	hsa-mir-27b	UUCACAGUGGCUAAGUUCUGC	1.19461	up	1951	1633
hsa-miR-28-3p	hsa-mir-28	CACUAGAUUGUGAGCUCCUGGA	-6.48148	down	26	174
hsa-miR-28-5p	hsa-mir-28	AAGGAGCUCACAGUCUAUUGAG	53	up	52
hsa-miR-296-3p	hsa-mir-296	GAGGGUUGGGUGGAGGCUCUCC	-16	down		15
hsa-miR-29a-3p	hsa-mir-29a	UAGCACCAUCUGAAAUCGGUUA	1.10989	up	403	363
hsa-miR-30a-3p	hsa-mir-30a	CUUUCAGUCGGAUGUUUGCAGC	2.56522	up	117	45
hsa-miR-30a-5p	hsa-mir-30a	UGUAAACAUCCUCGACUGGAAG	1.48401	up	1066	718
hsa-miR-30b-5p	hsa-mir-30b	UGUAAACAUCCUACACUCAGCU	2.032	up	507	249
hsa-miR-30c-5p	hsa-mir-30c-2	UGUAAACAUCCUACACUCUCAGC	1.04393	up	403	386
hsa-miR-30c-5p	hsa-mir-30c-1	UGUAAACAUCCUACACUCUCAGC	1.04393	up	403	386
hsa-miR-30d-5p	hsa-mir-30d	UGUAAACAUCCCCGACUGGAAG	1.08165	up	1496	1383
hsa-miR-30e-3p	hsa-mir-30e	CUUUCAGUCGGAUGUUUACAGC	-1.52381	down	104	159
hsa-miR-30e-5p	hsa-mir-30e	UGUAAACAUCCUUGACUGGAAG	-1.73729	down	117	204
hsa-miR-3127-3p	hsa-mir-3127	UCCCCUUCUGCAGGCCUGCUGG	40	up	39
hsa-miR-3150b-3p	hsa-mir-3150b	UGAGGAGAUCGUCGAGGUUGG	-16	down		15
hsa-miR-3198	hsa-mir-3198-1	GUGGAGUCCUGGGGAAUGGAGA	-1.2963	down	26	34
hsa-miR-3198	hsa-mir-3198-2	GUGGAGUCCUGGGGAAUGGAGA	-1.2963	down	26	34
hsa-miR-32-5p	hsa-mir-32	UAUUGCACAUUACUAAGUUGCA	1.6875	up	26	15
hsa-miR-320a-3p	hsa-mir-320a	AAAAGCUGGGUUGAGAGGGCGA	-1.63298	down	113878	185961
hsa-miR-320b	hsa-mir-320b-1	AAAAGCUGGGUUGAGAGGGCAA	-24	down		23
hsa-miR-320b	hsa-mir-320b-2	AAAAGCUGGGUUGAGAGGGCAA	-24	down		23
hsa-miR-320d	hsa-mir-320d-1	AAAAGCUGGGUUGAGAGGA	-20	down		19
hsa-miR-320d	hsa-mir-320d-2	AAAAGCUGGGUUGAGAGGA	-20	down		19
hsa-miR-326	hsa-mir-326	CCUCUGGGCCCUUCCUCCAG	1.125	up	26	23
hsa-miR-328-3p	hsa-mir-328	CUGGCCCUCUCUGCCCUUCCGU	1.90511	up	260	136
hsa-miR-330-3p	hsa-mir-330	GCAAAGCACACGGCCUGCAGAGA	-16	down		15
hsa-miR-330-5p	hsa-mir-330	UCUCUGGGCCUGUGUCUUAGGC	27	up	26
hsa-miR-339-3p	hsa-mir-339	UGAGCGCCUCGACGACAGAGCCG	-54	down		53
hsa-miR-339-5p	hsa-mir-339	UCCCUGUCCUCCAGGAGCUCACG	2.25862	up	130	57
hsa-miR-340-3p	hsa-mir-340	UCCGUCUCAGUUACUUUAUAGC	-24	down		23
hsa-miR-340-5p	hsa-mir-340	UUAUAAAGCAAUGAGACUGAUU	-3.12214	down	130	408
hsa-miR-342-3p	hsa-mir-342	UCUCACACAGAAAUCGCACCCGU	-16	down		15
hsa-miR-361-3p	hsa-mir-361	UCCCCCAGGUGUGAUUCUGAUUU	-16	down		15
hsa-miR-361-5p	hsa-mir-361	UUAUCAGAAUCUCCAGGGGUAC	2.96774	up	91	30
hsa-miR-3613-5p	hsa-mir-3613	UGUUGUACUUUUUUUUUUGUUC	-130	down		129
hsa-miR-363-3p	hsa-mir-363	AAUUGCACGGUAUCCAUCUGUA	1.6875	up	26	15
hsa-miR-370-3p	hsa-mir-370	GCCUGCUGGGGUGGAACCUGGU	-198	down		197
hsa-miR-374a-3p	hsa-mir-374a	CUUAUCAGAUUGUAUUGUAAUU	-39	down		38
hsa-miR-374a-5p	hsa-mir-374a	UUAUAAUACAACCUGAUAAGUG	-77	down		76
hsa-miR-374b-5p	hsa-mir-374b	AUAUAAUACAACCUGCUAAGUG	1.29032	up	39	30
hsa-miR-375-3p	hsa-mir-375	UUUGUUCGUUCGGCUCGCGUGA	-1.725	down	39	68
hsa-miR-378a-3p	hsa-mir-378a	ACUGGACUUGGAGUCAGAAGGC	1.30954	up	2237	1708
hsa-miR-378a-5p	hsa-mir-378a	CUCCUGACUCCAGGUCCUGUGU	13.875	up	221	15
hsa-miR-378d	hsa-mir-378d-2	ACUGGACUUGGAGUCAGAAA	-1.02174	down	137	140
hsa-miR-378d	hsa-mir-378d-1	ACUGGACUUGGAGUCAGAAA	-1.02174	down	137	140
hsa-miR-379-5p	hsa-mir-379	UGGUAGACUAUGGAACGUAGG	-16	down		15
hsa-miR-381-3p	hsa-mir-381	UAUACAAGGGCAAGCUCUCUGU	-16	down		15
hsa-miR-382-5p	hsa-mir-382	GAAGUUGUUCGUGGUGGAUUCG	-31	down		30
hsa-miR-423-3p	hsa-mir-423	AGCUCGGUCUGAGGCCCCUCAGU	1.02341	up	611	597
hsa-miR-423-5p	hsa-mir-423	UGAGGGGCAGAGAGCGAGACUUU	-1.42598	down	715	1020
hsa-miR-425-5p	hsa-mir-425	AAUGACACGAUCACUCCCGUUGA	-1.32609	down	91	121
hsa-miR-4430	hsa-mir-4430	AGGCUGGAGUGAGCGGAG	-16	down		15
hsa-miR-4470	hsa-mir-4470	UGGCAAACGUGGAAGCCGAGA	-46	down		45
hsa-miR-4508	hsa-mir-4508	GCGGGGCUGGGCGCGCG	-39	down		38
hsa-miR-451a	hsa-mir-451a	AAACCGUUACCAUUACUGAGUU	-3.54331	down	507	1799
hsa-miR-452-5p	hsa-mir-452	AACUGUUUGCAGAGGAAACUGA	-16	down		15
hsa-miR-455-5p	hsa-mir-455	UAUGUGCCUUUGGACUACAUCG	1.28261	up	117	91
hsa-miR-4677-3p	hsa-mir-4677	UCUGUGAGACCAAAGAACUACU	-16	down		15
hsa-miR-4750-5p	hsa-mir-4750	CUCGGGCGGAGGUGGUUGAGUG	-31	down		30
hsa-miR-483-5p	hsa-mir-483	AAGACGGGAGGAAAGAAGGGAG	573	up	572
hsa-miR-484	hsa-mir-484	UCAGGCUCAGUCCCCUCCCGAU	2.54839	up	78	30
hsa-miR-486-5p	hsa-mir-486-1	UCCUGUACUGAGCUGCCCCGAG	-1.27174	down	1379	1754
hsa-miR-486-5p	hsa-mir-486-2	UCCUGUACUGAGCUGCCCCGAG	-1.27174	down	1379	1754
hsa-miR-490-3p	hsa-mir-490	CAACCUGGAGGACUCCAUGCUG	11.5385	up	449	38
hsa-miR-493-3p	hsa-mir-493	UGAAGGUCUACUGUGUGCCAGG	-16	down		15
hsa-miR-495-3p	hsa-mir-495	AAACAAACAUGGUGCACUUCUU	-24	down		23
hsa-miR-499a-5p	hsa-mir-499a	UUAAGACUUGCAGUGAUGUUU	1.6875	up	26	15
hsa-miR-500a-3p	hsa-mir-500a	AUGCACCUGGGCAAGGAUUCUG	3.83333	up	91	23
hsa-miR-501-3p	hsa-mir-501	AAUGCACCCGGGCAAGGAUUCU	-24	down		23
hsa-miR-502-3p	hsa-mir-502	AAUGCACCUGGGCAAGGAUUCA	-24	down		23
hsa-miR-509-3-5p	hsa-mir-509-3	UACUGCAGACGUGGCAAUCAUG	1.125	up	26	23
hsa-miR-532-5p	hsa-mir-532	CAUGCCUUGAGUGUAGGACCGU	-5.125	down	39	204
hsa-miR-542-3p	hsa-mir-542	UGUGACAGAUUGAUAACUGAAA	-43	down		42
hsa-miR-574-3p	hsa-mir-574	CACGCUCAUGCACACACCCACA	-46	down		45
hsa-miR-576-3p	hsa-mir-576	AAGAUGUGGAAAAAUUGGAAUC	-24	down		23
hsa-miR-629-5p	hsa-mir-629	UGGGUUUACGUUGGGAGAACU	-7.83333	down	59	469
hsa-miR-6515-5p	hsa-mir-6515	UUGGAGGGUGUGGAAGACAUC	-69	down		68
hsa-miR-652-3p	hsa-mir-652	AAUGGCGCCACUAGGGUUGUG	-30.2476	down	104	3175
hsa-miR-671-5p	hsa-mir-671	AGGAAGCCCUGGAGGGGCUGGAG	3.82759	up	221	57
hsa-miR-6842-3p	hsa-mir-6842	UUGGCUGGUCUCUGCUCCGCAG	-24	down		23
hsa-miR-6846-5p	hsa-mir-6846	UGGGGGCUGGAUGGGGUAGAGU	53	up	52
hsa-miR-7-5p	hsa-mir-7-1	UGGAAGACUAGUGAUUUUGUUGUU	1.03333	up	61	59
hsa-miR-7-5p	hsa-mir-7-2	UGGAAGACUAGUGAUUUUGUUGUU	1.03333	up	61	59
hsa-miR-7-5p	hsa-mir-7-3	UGGAAGACUAGUGAUUUUGUUGUU	1.03333	up	61	59
hsa-miR-744-5p	hsa-mir-744	UGCGGGGCUAGGGCUAACAGCA	1.7193	up	195	113
hsa-miR-769-5p	hsa-mir-769	UGAGACCUCUGGGUUCUGAGCU	-20	down		19
hsa-miR-7845-5p	hsa-mir-7845	AAGGGACAGGGAGGGUCGUGG	-16	down		15
hsa-miR-889-3p	hsa-mir-889	UUAAUAUCGGACAACCAUUGU	-31	down		30
hsa-miR-9-5p	hsa-mir-9-1	UCUUUGGUUAUCUAGCUGUAUGA	-14	down		13
hsa-miR-9-5p	hsa-mir-9-2	UCUUUGGUUAUCUAGCUGUAUGA	-14	down		13
hsa-miR-9-5p	hsa-mir-9-3	UCUUUGGUUAUCUAGCUGUAUGA	-14	down		13
hsa-miR-92a-3p	hsa-mir-92a-1	UAUUGCACUUGUCCCGGCCUGU	1.22688	up	1405	1145
hsa-miR-92a-3p	hsa-mir-92a-2	UAUUGCACUUGUCCCGGCCUGU	1.22688	up	1405	1145
hsa-miR-93-5p	hsa-mir-93	CAAAGUGCUGUUCGUGCAGGUAG	1.19767	up	1132	945
hsa-miR-939-5p	hsa-mir-939	UGGGGAGCUGAGGCUCUGGGGGUG	1.125	up	26	23
hsa-miR-941	hsa-mir-941-1	CACCCGGCUGUGUGCACAUGUGC	-13	down		12
hsa-miR-941	hsa-mir-941-2	CACCCGGCUGUGUGCACAUGUGC	-13	down		12
hsa-miR-941	hsa-mir-941-3	CACCCGGCUGUGUGCACAUGUGC	-13	down		12
hsa-miR-941	hsa-mir-941-4	CACCCGGCUGUGUGCACAUGUGC	-13	down		12
hsa-miR-941	hsa-mir-941-5	CACCCGGCUGUGUGCACAUGUGC	-13	down		12
hsa-miR-95-3p	hsa-mir-95	UUCAACGGGUAUUUAUUGAGCA	-24	down		23
hsa-miR-98-5p	hsa-mir-98	UGAGGUAGUAAGUUGUAUUGUU	-1.68182	down	65	110
hsa-miR-99a-5p	hsa-mir-99a	AACCCGUAGAUCCGAUCUUGUG	196	up	195
hsa-miR-99b-5p	hsa-mir-99b	CACCCGUAGAACCGACCUUGCG	5.13115	up	312	60
hsa-miR-novel-chr10_1124	hsa-mir-novel-chr10_1124	ACUCGGCGUGGCGUCGGUCGUGG	1.73568	up	2120	1221
hsa-miR-novel-chr10_891	hsa-mir-novel-chr10_891	CUGGGACUGCAGUGGGUC	66	up	65
hsa-miR-novel-chr11_1837	hsa-mir-novel-chr11_1837	CGGGCGGGGGCGGGAGGG	-46	down		45
hsa-miR-novel-chr11_2017	hsa-mir-novel-chr11_2017	GCCCAGGGCUGAGGCGAGAGG	118	up	117
hsa-miR-novel-chr11_2136	hsa-mir-novel-chr11_2136	AGGCGGAGGUGGAGGGAG	118	up	117
hsa-miR-novel-chr11_2204	hsa-mir-novel-chr11_2204	AAGCUGCAGGCUGGAGGCUGCUG	66	up	65
hsa-miR-novel-chr11_2206	hsa-mir-novel-chr11_2206	UUCAGGUCUUGGAGACAAAU	-31	down		30
hsa-miR-novel-chr11_2272	hsa-mir-novel-chr11_2272	UCUGGCUGAGGAGGAAGUGGA	157	up	156
hsa-miR-novel-chr11_2543	hsa-mir-novel-chr11_2543	CUGACCUAUGAAUUGACAGC	3.04396	up	553	181
hsa-miR-novel-chr12_3006	hsa-mir-novel-chr12_3006	AGGAGUGUGAGGAGCUGAAGGAAA	92	up	91
hsa-miR-novel-chr12_3625	hsa-mir-novel-chr12_3625	CGGAGCUGGGGGGUCCCUG	131	up	130
hsa-miR-novel-chr12_3956	hsa-mir-novel-chr12_3956	CUCUUCUGGGCUGUUCUUU	170	up	169
hsa-miR-novel-chr12_4116	hsa-mir-novel-chr12_4116	CUGAGGUCUGGAGUGGACGAUG	66	up	65
hsa-miR-novel-chr13_4647	hsa-mir-novel-chr13_4647	UCUGUGUGUUUGGGGCUGCUUUGU	144	up	143
hsa-miR-novel-chr14_5271	hsa-mir-novel-chr14_5271	GAAGCUCAGAGGGCUCUGAUUC	-69	down		68
hsa-miR-novel-chr14_5418	hsa-mir-novel-chr14_5418	ACUCCAUGGGCUUUGGACCUUGG	-77	down		76
hsa-miR-novel-chr15_6007	hsa-mir-novel-chr15_6007	UGGACUUGGAGUCAGAAG	-1.64151	down	52	86
hsa-miR-novel-chr15_6553	hsa-mir-novel-chr15_6553	GGGGCUGGAGAGAUGGC	1.45455	up	143	98
hsa-miR-novel-chr15_6643	hsa-mir-novel-chr15_6643	UGGGUUUACGUUGGGAGAACUU	-17.2075	down	52	911
hsa-miR-novel-chr16_7801	hsa-mir-novel-chr16_7801	AGGCCUGGGGGCUGAAGAGG	105	up	104
hsa-miR-novel-chr16_7839	hsa-mir-novel-chr16_7839	GCAGGACGGUGGCCAUG	-1.31944	down	143	189
hsa-miR-novel-chr17_8506	hsa-mir-novel-chr17_8506	UAGCUUAUCAGACUGAUGUUGAC	-1.32276	down	14189	18769
hsa-miR-novel-chr17_9199	hsa-mir-novel-chr17_9199	UGGGAUGAGAAGGAUGUG	-24	down		23
hsa-miR-novel-chr17_9261	hsa-mir-novel-chr17_9261	UACCCUGUAGAUCCGAAUUUGU	1.79557	up	1053	586
hsa-miR-novel-chr18_10018	hsa-mir-novel-chr18_10018	AGAGACUGGGGAGAAACC	27	up	26
hsa-miR-novel-chr18_10094	hsa-mir-novel-chr18_10094	AAGUUCCGGAAGGGAGGCUG	-24	down		23
hsa-miR-novel-chr18_9811	hsa-mir-novel-chr18_9811	GAAAGAGUGGGAGGAAGA	66	up	65
hsa-miR-novel-chr18_9923	hsa-mir-novel-chr18_9923	GGGGGCUGUAGGAUUCUCAGGUAG	79	up	78
hsa-miR-novel-chr19_10242	hsa-mir-novel-chr19_10242	GGGGCUGGCUGGGCAGGAGA	105	up	104
hsa-miR-novel-chr19_10425	hsa-mir-novel-chr19_10425	ACCAUCGACCGUUGAGUGGAC	-16	down		15
hsa-miR-novel-chr19_10726	hsa-mir-novel-chr19_10726	UGAGACCUCUGGGUUCUGAG	-8.9542	down	130	1172
hsa-miR-novel-chr19_11108	hsa-mir-novel-chr19_11108	GGGAUGAAGGUGGAACUGG	144	up	143
hsa-miR-novel-chr19_11309	hsa-mir-novel-chr19_11309	AGGGCUGCAGAGAGGGAG	131	up	130
hsa-miR-novel-chr19_11538	hsa-mir-novel-chr19_11538	GCGGGGCCUGGUGGCGGCUG	118	up	117
hsa-miR-novel-chr1_12952	hsa-mir-novel-chr1_12952	GCUGGCCGGGCUGGCUGCG	79	up	78
hsa-miR-novel-chr1_13147	hsa-mir-novel-chr1_13147	GAGGUCUGGGAGGCUGGG	118	up	117
hsa-miR-novel-chr1_13400	hsa-mir-novel-chr1_13400	AGGAGGGGACGGCAGCACCA	92	up	91
hsa-miR-novel-chr1_13462	hsa-mir-novel-chr1_13462	CUGCCAGGGGAGCUCUGCUG	53	up	52
hsa-miR-novel-chr1_14144	hsa-mir-novel-chr1_14144	AGGGAAGGAGAGAGCCUG	92	up	91
hsa-miR-novel-chr1_14381	hsa-mir-novel-chr1_14381	AACAUUCAUUGCUGUCGGUGG	-21	down		20
hsa-miR-novel-chr20_14869	hsa-mir-novel-chr20_14869	AGAGGCUGGAGAGUCAAA	66	up	65
hsa-miR-novel-chr20_14983	hsa-mir-novel-chr20_14983	UUGGUCCCCUUCAACCAGCUGU	1.62069	up	234	144
hsa-miR-novel-chr20_15216	hsa-mir-novel-chr20_15216	AGCCAGGCUCUGAAGGGAAA	27	up	26
hsa-miR-novel-chr21_16083	hsa-mir-novel-chr21_16083	GCGCUGGCGGUGUGGACGCGGA	-24	down		23
hsa-miR-novel-chr22_16369	hsa-mir-novel-chr22_16369	AGCUGCUGGUCUGGAAACUCAGU	-16	down		15
hsa-miR-novel-chr22_16420	hsa-mir-novel-chr22_16420	GAAAGGAGAAGAAAAGGG	118	up	117
hsa-miR-novel-chr2_17173	hsa-mir-novel-chr2_17173	AAGAAGAGGAAGAAAGAGAGAGGAA	144	up	143
hsa-miR-novel-chr2_17350	hsa-mir-novel-chr2_17350	AUCCUAGCUUGCCUGAGACUG	-12	down		11
hsa-miR-novel-chr2_17520	hsa-mir-novel-chr2_17520	CUGCUGGGAGAACUGGAG	79	up	78
hsa-miR-novel-chr2_17740	hsa-mir-novel-chr2_17740	UACCCUGUAGAACCGAAUUUGU	1.15127	up	722	627
hsa-miR-novel-chr2_17891	hsa-mir-novel-chr2_17891	UGCGUGGGAGGAAGGACCAGGC	105	up	104
hsa-miR-novel-chr2_17910	hsa-mir-novel-chr2_17910	GGAGGAGGAGCUGGAGA	-31	down		30
hsa-miR-novel-chr2_17948	hsa-mir-novel-chr2_17948	UGAGGAAGAAGAGGAUGGAAGG	53	up	52
hsa-miR-novel-chr2_18007	hsa-mir-novel-chr2_18007	AGGGCUGGGCCGGGCGGG	-31	down		30
hsa-miR-novel-chr2_18130	hsa-mir-novel-chr2_18130	UGGCUGGCCCGUGGGGCG	79	up	78
hsa-miR-novel-chr2_18305	hsa-mir-novel-chr2_18305	ACAGGAGUGGGGGGUGGGACGU	161	up	160
hsa-miR-novel-chr2_18306	hsa-mir-novel-chr2_18306	ACAGGAGUGGGGGGUGGGACGU	161	up	160
hsa-miR-novel-chr3_19732	hsa-mir-novel-chr3_19732	AAAGCAGGAUUCAGACUACA	-16	down		15
hsa-miR-novel-chr3_19892	hsa-mir-novel-chr3_19892	GGGGCCGAGGGAGCGAG	1.66667	up	39	23
hsa-miR-novel-chr5_22142	hsa-mir-novel-chr5_22142	AAAGAACUUUGAAAAGAG	6	up	143	23
hsa-miR-novel-chr5_22357	hsa-mir-novel-chr5_22357	GGGGAUGUAGCUCAGUGGU	-1.44444	down	26	38
hsa-miR-novel-chr5_22400	hsa-mir-novel-chr5_22400	CUCUUCAGGAUCUGUGGGUAGC	92	up	91
hsa-miR-novel-chr5_22795	hsa-mir-novel-chr5_22795	AGUGAAACUGGAAAAUGAAACU	157	up	156
hsa-miR-novel-chr5_22853	hsa-mir-novel-chr5_22853	CCCGGGCUGGGCGCGAAGAGAGGA	131	up	130
hsa-miR-novel-chr5_22869	hsa-mir-novel-chr5_22869	GAGGAGAGAAGGGCUGGGG	105	up	104
hsa-miR-novel-chr5_23088	hsa-mir-novel-chr5_23088	GCUGGGGAGGUGAACUGGUG	66	up	65
hsa-miR-novel-chr6_23423	hsa-mir-novel-chr6_23423	CUGAGUGUGGGACCUCUG	-16	down		15
hsa-miR-novel-chr6_23897	hsa-mir-novel-chr6_23897	UCUGGCUGAGGAGGAAGUGGA	157	up	156
hsa-miR-novel-chr6_23941	hsa-mir-novel-chr6_23941	GCUGGAGGGAGGCUGGGCG	105	up	104
hsa-miR-novel-chr7_24973	hsa-mir-novel-chr7_24973	CUGGGACUGCAGUGGGUC	66	up	65
hsa-miR-novel-chr7_25390	hsa-mir-novel-chr7_25390	AGUUGGUCCGAGUGUUGUGG	-1.79046	down	481	862
hsa-miR-novel-chr7_25414	hsa-mir-novel-chr7_25414	AGGAAGCCCUGGAGGGGCUGGAGG	9.60194	up	988	102
hsa-miR-novel-chr7_25437	hsa-mir-novel-chr7_25437	UGGAAUGGCCUGAAGGUGGA	-16	down		15
hsa-miR-novel-chr7_25446	hsa-mir-novel-chr7_25446	GAAAAGGAGGAAGGGAUGGACAG	92	up	91
hsa-miR-novel-chr7_25490	hsa-mir-novel-chr7_25490	UGAGCGCCUCGACGACAGAGC	1.71739	up	78	45
hsa-miR-novel-chr7_25563	hsa-mir-novel-chr7_25563	AGGGCUGUGGGGCAGGGA	-39	down		38
hsa-miR-novel-chr7_26019	hsa-mir-novel-chr7_26019	UUUGGCAAUGGUAGAACUCACA	-69	down		68
hsa-miR-novel-chr8_26363	hsa-mir-novel-chr8_26363	AAAAGCUGGGUUGAGAGG	55	up	54
hsa-miR-novel-chr8_26637	hsa-mir-novel-chr8_26637	UGGACCUCGGGGCUGGGGCUG	118	up	117
hsa-miR-novel-chr9_27273	hsa-mir-novel-chr9_27273	GGAGUAGGAGGCUGCGGAGA	131	up	130
hsa-miR-novel-chr9_27523	hsa-mir-novel-chr9_27523	AUCACAUUGCCAGGGAUU	1.05882	up	35	33
hsa-miR-novel-chr9_28240	hsa-mir-novel-chr9_28240	ACAGUAGUCUGCACAUUGGUU	1.35563	up	384	283
hsa-miR-novel-chrX_28461	hsa-mir-novel-chrX_28461	CUGCCUCUUCGAGCUCCUGGGG	34	up	33
hsa-miR-novel-chrX_28471	hsa-mir-novel-chrX_28471	CCGGGGAGGAAAGGCUGGCG	21	up	20
hsa-miR-novel-chrX_28480	hsa-mir-novel-chrX_28480	AUCCUAGCUUGCCUGAGACUG	-12	down		11
hsa-miR-novel-chrX_28654	hsa-mir-novel-chrX_28654	CGGCGGGGGCGGCGCGCG	105	up	104
hsa-miR-novel-chrX_28914	hsa-mir-novel-chrX_28914	CUGCCUCUUCGAGCUCCUGGGG	34	up	33
hsa-miR-novel-chrX_29044	hsa-mir-novel-chrX_29044	AGCUACAUUGUCUGCUGGGUUUCA	-16	down		15
hsa-miR-novel-chrX_29247	hsa-mir-novel-chrX_29247	UUUUGCGAUGUGUUCCUAAU	-14	down		13
hsa-miR-novel-chrY_29361	hsa-mir-novel-chrY_29361	CUGCCUCUUCGAGCUCCUGGGG	34	up	33
hsa-miR-novel-chrY_29371	hsa-mir-novel-chrY_29371	CCGGGGAGGAAAGGCUGGCG	21	up	20
hsa-miR-novel-chrY_29422	hsa-mir-novel-chrY_29422	CUGCCUCUUCGAGCUCCUGGGG	34	up	33

## Sheet: After-3_vs_Before-3
miRNA expression for After-3 vs Before-3 Column A: Mature miRNA, the mature miRNA name. Column B: Pre-miRNA, the pre-miRNA name. Column C: Sequence, the mature miRNA sequence. Column D: Fold change, fold change between two samples. Column E: Regulation, 'up' indicates up-regulation, and 'down' indicates down-regulation. Column F ~ G: Tag Counts (normalized), the normalized tag counts of the matur…
miRNA Information			Fold change & Regulation		Tag counts (normalized)
mature-miRNA	pre-miRNA	mature-sequence	Fold Change	Regulation	After-3	Before-3
hsa-let-7a-3p	hsa-let-7a-1	CUAUACAAUCUACUGUCUUUC	1.90909	up	20	10
hsa-let-7a-3p	hsa-let-7a-3	CUAUACAAUCUACUGUCUUUC	1.90909	up	20	10
hsa-let-7a-5p	hsa-let-7a-1	UGAGGUAGUAGGUUGUAUAGUU	8.49624	up	2259	265
hsa-let-7a-5p	hsa-let-7a-2	UGAGGUAGUAGGUUGUAUAGUU	8.49624	up	2259	265
hsa-let-7a-5p	hsa-let-7a-3	UGAGGUAGUAGGUUGUAUAGUU	8.49624	up	2259	265
hsa-let-7b-5p	hsa-let-7b	UGAGGUAGUAGGUUGUGUGGUU	-1.84968	down	3159	5844
hsa-let-7c-5p	hsa-let-7c	UGAGGUAGUAGGUUGUAUGGUU	6.68902	up	1096	163
hsa-let-7d-3p	hsa-let-7d	CUAUACGACCUGCUGCCUUUCU	-1.01818	down	219	223
hsa-let-7d-5p	hsa-let-7d	AGAGGUAGUAGGUUGCAUAGUU	4.71831	up	1674	354
hsa-let-7e-5p	hsa-let-7e	UGAGGUAGGAGGUUGUAUAGUU	7.58333	up	90	11
hsa-let-7f-5p	hsa-let-7f-1	UGAGGUAGUAGAUUGUAUAGUU	11.6136	up	7664	659
hsa-let-7f-5p	hsa-let-7f-2	UGAGGUAGUAGAUUGUAUAGUU	11.6136	up	7664	659
hsa-let-7g-3p	hsa-let-7g	CUGUACAGGCCACUGCCUUGC	-7	down		6
hsa-let-7g-5p	hsa-let-7g	UGAGGUAGUAGUUUGUACAGUU	3.49811	up	16643	4757
hsa-let-7i-3p	hsa-let-7i	CUGCGCAAGCUACUGCCUUGCU	1.82353	up	30	16
hsa-let-7i-5p	hsa-let-7i	UGAGGUAGUAGUUUGUGCUGUU	-1.85856	down	16762	31154
hsa-miR-1-3p	hsa-mir-1-2	UGGAAUGUAAAGAAGUAUGUAU	8.86577	up	1320	148
hsa-miR-1-3p	hsa-mir-1-1	UGGAAUGUAAAGAAGUAUGUAU	8.86577	up	1320	148
hsa-miR-100-5p	hsa-mir-100	AACCCGUAGAUCCGAACUUGUG	-3.78049	down	40	154
hsa-miR-101-3p	hsa-mir-101-1	UACAGUACUGUGAUAACUGAA	-3.6499	down	1450	5295
hsa-miR-101-3p	hsa-mir-101-2	UACAGUACUGUGAUAACUGAA	-3.6499	down	1450	5295
hsa-miR-10392-5p	hsa-mir-10392	GCGCUUCGACGGGCUGGGCUGUG	-4	down		3
hsa-miR-10395-3p	hsa-mir-10395	AUGUAUUCGUACUGUCUGAUG	-41	down		40
hsa-miR-10399-5p	hsa-mir-10399	AAUUACAGAUUGUCUCAGAGA	-29	down		28
hsa-miR-103a-2-5p	hsa-mir-103a-2	AGCUUCUUUACAGUGCUGCCUUG	-11	down		10
hsa-miR-103a-3p	hsa-mir-103a-2	AGCAGCAUUGUACAGGGCUAUGA	-2.52781	down	1545	3907
hsa-miR-103a-3p	hsa-mir-103a-1	AGCAGCAUUGUACAGGGCUAUGA	-2.52781	down	1545	3907
hsa-miR-10527-5p	hsa-mir-10527	AAAGCAAAUGUUGGGUGAACGGC	-11	down		10
hsa-miR-106a-5p	hsa-mir-106a	AAAAGUGCUUACAGUGCAGGUAG	-16	down		15
hsa-miR-106b-3p	hsa-mir-106b	CCGCACUGUGGGUACUUGCUGC	1.51064	up	70	46
hsa-miR-106b-5p	hsa-mir-106b	UAAAGUGCUGACAGUGCAGAU	-1.56316	down	189	296
hsa-miR-107	hsa-mir-107	AGCAGCAUUGUACAGGGCUAUCA	-10	down		9
hsa-miR-10a-5p	hsa-mir-10a	UACCCUGUAGAUCCGAAUUUGUG	-2.23077	down	25	57
hsa-miR-10b-5p	hsa-mir-10b	UACCCUGUAGAACCGAAUUUGUG	3.27273	up	35	10
hsa-miR-11400	hsa-mir-11400	UCGGCUGUGUAUCUCUGUGUC	-20	down		19
hsa-miR-1180-3p	hsa-mir-1180	UUUCCGGCUCGCGUGGGUGUGU	-10	down		9
hsa-miR-1185-1-3p	hsa-mir-1185-1	AUAUACAGGGGGAGACUCUUAU	-7	down		6
hsa-miR-122-5p	hsa-mir-122	UGGAGUGUGACAAUGGUGUUUG	4.44527	up	5969	1342
hsa-miR-1246	hsa-mir-1246	AAUGGAUUUUUGGAGCAGG	-6.28571	down	20	131
hsa-miR-1249-3p	hsa-mir-1249	ACGCCCUUCCCCCCCUUCUUCA	-3	down		2
hsa-miR-1250-5p	hsa-mir-1250	ACGGUGCUGGAUGUGGCCUUU	-98	down		97
hsa-miR-1255a	hsa-mir-1255a	AGGAUGAGCAAAGAAAGUAGAUU	-6	down		5
hsa-miR-125a-5p	hsa-mir-125a	UCCCUGAGACCCUUUAACCUGUGA	-3	down		2
hsa-miR-125b-5p	hsa-mir-125b-1	UCCCUGAGACCCUAACUUGUGA	4.33333	up	25	5
hsa-miR-125b-5p	hsa-mir-125b-2	UCCCUGAGACCCUAACUUGUGA	4.33333	up	25	5
hsa-miR-126-3p	hsa-mir-126	UCGUACCGUGAGUAAUAAUGCG	-1.08221	down	887	960
hsa-miR-126-5p	hsa-mir-126	CAUUAUUACUUUUGGUACGCG	19.4359	up	757	38
hsa-miR-1260b	hsa-mir-1260b	AUCCCACCACUGCCACCAU	-3	down		2
hsa-miR-1268a	hsa-mir-1268a	CGGGCGUGGUGGUGGGGG	-8	down		7
hsa-miR-127-3p	hsa-mir-127	UCGGAUCCGUCUGAGCUUGGCU	4.2	up	20	4
hsa-miR-1273h-3p	hsa-mir-1273h	CUGCAGACUCGACCUCCCAGGC	-17	down		16
hsa-miR-1273h-5p	hsa-mir-1273h	CUGGGAGGUCAAGGCUGCAGU	-9	down		8
hsa-miR-128-3p	hsa-mir-128-1	UCACAGUGAACCGGUCUCUUU	6.31897	up	732	115
hsa-miR-128-3p	hsa-mir-128-2	UCACAGUGAACCGGUCUCUUU	6.31897	up	732	115
hsa-miR-1285-3p	hsa-mir-1285-1	UCUGGGCAACAAAGUGAGACCU	-16	down		15
hsa-miR-1285-3p	hsa-mir-1285-2	UCUGGGCAACAAAGUGAGACCU	-16	down		15
hsa-miR-1287-5p	hsa-mir-1287	UGCUGGAUCAGUGGUUCGAGUC	-6	down		5
hsa-miR-1288-3p	hsa-mir-1288	UGGACUGCCCUGAUCUGGAGA	-4	down		3
hsa-miR-129-5p	hsa-mir-129-1	CUUUUUGCGGUCUGGGCUUGC	-3	down		2
hsa-miR-129-5p	hsa-mir-129-2	CUUUUUGCGGUCUGGGCUUGC	-3	down		2
hsa-miR-1291	hsa-mir-1291	UGGCCCUGACUGAAGACCAGCAGU	-4	down		3
hsa-miR-1294	hsa-mir-1294	UGUGAGGUUGGCAUUGUUGUCU	-4	down		3
hsa-miR-1299	hsa-mir-1299	UUCUGGAAUUCUGUGUGAGGGA	-3	down		2
hsa-miR-1301-3p	hsa-mir-1301	UUGCAGCUGCCUGGGAGUGACUUC	-9	down		8
hsa-miR-1304-5p	hsa-mir-1304	UUUGAGGCUACAGUGAGAUGUG	-8	down		7
hsa-miR-1306-3p	hsa-mir-1306	ACGUUGGCUCUGGUGGUG	-3	down		2
hsa-miR-1307-3p	hsa-mir-1307	ACUCGGCGUGGCGUCGGUCGUG	-3.7541	down	60	228
hsa-miR-1307-5p	hsa-mir-1307	UCGACCGGACCUCGACCGGCU	-3.83607	down	60	233
hsa-miR-130a-3p	hsa-mir-130a	CAGUGCAAUGUUAAAAGGGCAU	3.64286	up	50	13
hsa-miR-130a-5p	hsa-mir-130a	GCUCUUUUCACAUUGUGCUACU	-7	down		6
hsa-miR-130b-3p	hsa-mir-130b	CAGUGCAAUGAUGAAAGGGCAU	-7	down		6
hsa-miR-130b-5p	hsa-mir-130b	ACUCUUUCCCUGUUGCACUAC	-3	down		2
hsa-miR-132-3p	hsa-mir-132	UAACAGUCUACAGCCAUGGUCG	-1.9375	down	15	30
hsa-miR-1322	hsa-mir-1322	GAUGAUGCUGCUGAUGCUG	-3	down		2
hsa-miR-133a-3p	hsa-mir-133a-1	UUUGGUCCCCUUCAACCAGCUG	12.6667	up	37	2
hsa-miR-133a-3p	hsa-mir-133a-2	UUUGGUCCCCUUCAACCAGCUG	12.6667	up	37	2
hsa-miR-134-5p	hsa-mir-134	UGUGACUGGUUGACCAGAGGGG	9.77922	up	1505	153
hsa-miR-136-3p	hsa-mir-136	CAUCAUCGUCUCAAAUGAGUCU	-4	down		3
hsa-miR-139-3p	hsa-mir-139	UGGAGACGCGGCCCUGUUGGAGU	-28	down		27
hsa-miR-139-5p	hsa-mir-139	UCUACAGUGCACGUGUCUCCAGU	-1.06452	down	30	32
hsa-miR-140-3p	hsa-mir-140	UACCACAGGGUAGAACCACGG	-1.77231	down	548	972
hsa-miR-140-5p	hsa-mir-140	CAGUGGUUUUACCCUAUGGUAG	3.41445	up	897	262
hsa-miR-142-3p	hsa-mir-142	UGUAGUGUUUCCUACUUUAUGGA	1.3986	up	199	142
hsa-miR-142-5p	hsa-mir-142	CAUAAAGUAGAAAGCACUACU	-1.27895	down	189	242
hsa-miR-143-3p	hsa-mir-143	UGAGAUGAAGCACUGUAGCUC	-2.73895	down	8645	23680
hsa-miR-144-3p	hsa-mir-144	UACAGUAUAGAUGAUGUACU	-1.22	down	149	182
hsa-miR-144-5p	hsa-mir-144	GGAUAUCAUCAUAUACUGUAAG	-4	down		3
hsa-miR-145-5p	hsa-mir-145	GUCCAGUUUUCCCAGGAAUCCCU	1.55952	up	130	83
hsa-miR-146a-5p	hsa-mir-146a	UGAGAACUGAAUUCCAUGGGUU	-2.36005	down	2432	5741
hsa-miR-146b-3p	hsa-mir-146b	GCCCUGUGGACUCAGUUCUGGU	-370	down		369
hsa-miR-146b-5p	hsa-mir-146b	UGAGAACUGAAUUCCAUAGGCUG	-23.6227	down	977	23102
hsa-miR-148a-3p	hsa-mir-148a	UCAGUGCACUACAGAACUUUGU	3.3831	up	22094	6530
hsa-miR-148a-5p	hsa-mir-148a	AAAGUUCUGAGACACUCCGACU	-30.1429	down	20	632
hsa-miR-148b-3p	hsa-mir-148b	UCAGUGCAUCACAGAACUUUGU	5.17516	up	1624	313
hsa-miR-150-5p	hsa-mir-150	UCUCCCAACCCUUGUACCAGUG	-2.27938	down	518	1182
hsa-miR-151a-3p	hsa-mir-151a	CUAGACUGAAGCUCCUUGAGG	1.06944	up	384	359
hsa-miR-151a-5p	hsa-mir-151a	UCGAGGAGCUCACAGUCUAGU	16	up	15
hsa-miR-152-3p	hsa-mir-152	UCAGUGCAUGACAGAACUUGG	1.81139	up	508	280
hsa-miR-155-5p	hsa-mir-155	UUAAUGCUAAUCGUGAUAGGGGUU	-25	down		24
hsa-miR-15a-5p	hsa-mir-15a	UAGCAGCACAUAAUGGUUUGUG	5.29412	up	179	33
hsa-miR-15b-3p	hsa-mir-15b	CGAAUCAUUAUUUGCUGCUCUA	2.1	up	20	9
hsa-miR-15b-5p	hsa-mir-15b	UAGCAGCACAUCAUGGUUUACA	5.16129	up	159	30
hsa-miR-16-1-3p	hsa-mir-16-1	CCAGUAUUAACUGUGCUGCUGA	-10	down		9
hsa-miR-16-5p	hsa-mir-16-1	UAGCAGCACGUAAAUAUUGGCG	2.29412	up	1091	475
hsa-miR-16-5p	hsa-mir-16-2	UAGCAGCACGUAAAUAUUGGCG	2.29412	up	1091	475
hsa-miR-17-3p	hsa-mir-17	ACUGCAGUGAAGGCACUUGUAG	2.77273	up	60	21
hsa-miR-17-5p	hsa-mir-17	CAAAGUGCUUACAGUGCAGGUAG	3.26655	up	1923	588
hsa-miR-181a-2-3p	hsa-mir-181a-2	ACCACUGACCGUUGACUGUACC	-18	down		17
hsa-miR-181a-3p	hsa-mir-181a-1	ACCAUCGACCGUUGAUUGUACC	2.06667	up	30	14
hsa-miR-181a-5p	hsa-mir-181a-2	AACAUUCAACGCUGUCGGUGAGU	-3.00885	down	112	339
hsa-miR-181a-5p	hsa-mir-181a-1	AACAUUCAACGCUGUCGGUGAGU	-3.00885	down	112	339
hsa-miR-181b-5p	hsa-mir-181b-1	AACAUUCAUUGCUGUCGGUGGGU	-1.44444	down	17	25
hsa-miR-181b-5p	hsa-mir-181b-2	AACAUUCAUUGCUGUCGGUGGGU	-1.44444	down	17	25
hsa-miR-181c-5p	hsa-mir-181c	AACAUUCAACCUGUCGGUGAGU	3.2	up	15	4
hsa-miR-181d-5p	hsa-mir-181d	AACAUUCAUUGUUGUCGGUGGGU	14	up	55	3
hsa-miR-182-5p	hsa-mir-182	UUUGGCAAUGGUAGAACUCACACU	-3.46154	down	25	89
hsa-miR-183-5p	hsa-mir-183	UAUGGCACUGGUAGAAUUCACU	-2.97561	down	40	121
hsa-miR-184	hsa-mir-184	UGGACGGAGAACUGAUAAGGGU	31	up	30
hsa-miR-185-5p	hsa-mir-185	UGGAGAGAAAGGCAGUUCCUGA	-4.22989	down	1565	6623
hsa-miR-186-5p	hsa-mir-186	CAAAGAAUUCUCCUUUUGGGCU	-3.3048	down	478	1582
hsa-miR-18a-3p	hsa-mir-18a	ACUGCCCUAAGUGCUCCUUCUGG	-9	down		8
hsa-miR-18a-5p	hsa-mir-18a	UAAGGUGCAUCUAGUGCAGAUAG	2.89286	up	80	27
hsa-miR-1908-5p	hsa-mir-1908	CGGCGGGGACGGCGAUUGGUC	-3	down		2
hsa-miR-191-5p	hsa-mir-191	CAACGGAAUCCCAAAAGCAGCUG	2.13306	up	11012	5162
hsa-miR-1910-3p	hsa-mir-1910	GAGGCAGAAGCAGGAUGACA	6.83333	up	40	5
hsa-miR-192-5p	hsa-mir-192	CUGACCUAUGAAUUGACAGCC	5.05298	up	762	150
hsa-miR-193a-3p	hsa-mir-193a	AACUGGCCUACAAAGUCCCAGU	-15	down		14
hsa-miR-193a-5p	hsa-mir-193a	UGGGUCUUUGCGGGCGAGAUGA	8.62069	up	249	28
hsa-miR-193b-3p	hsa-mir-193b	AACUGGCCCUCAAAGUCCCGCU	2.625	up	20	7
hsa-miR-194-5p	hsa-mir-194-1	UGUAACAGCAACUCCAUGUGGA	2	up	15	7
hsa-miR-194-5p	hsa-mir-194-2	UGUAACAGCAACUCCAUGUGGA	2	up	15	7
hsa-miR-197-3p	hsa-mir-197	UUCACCACCUUCUCCACCCAGC	-127	down		126
hsa-miR-1976	hsa-mir-1976	CCUCCUGCCCUCCUUGCUGU	-3	down		2
hsa-miR-199a-3p	hsa-mir-199a-1	ACAGUAGUCUGCACAUUGGUUA	9.70833	up	465	47
hsa-miR-199a-3p	hsa-mir-199a-2	ACAGUAGUCUGCACAUUGGUUA	9.70833	up	465	47
hsa-miR-199a-5p	hsa-mir-199a-1	CCCAGUGUUCAGACUACCUGUUC	-2.88235	down	135	391
hsa-miR-199a-5p	hsa-mir-199a-2	CCCAGUGUUCAGACUACCUGUUC	-2.88235	down	135	391
hsa-miR-199b-3p	hsa-mir-199b	ACAGUAGUCUGCACAUUGGUUA	9.70833	up	465	47
hsa-miR-199b-5p	hsa-mir-199b	CCCAGUGUUUAGACUAUCUGUUC	1.48235	up	125	84
hsa-miR-19a-3p	hsa-mir-19a	UGUGCAAAUCUAUGCAAAACUGA	12.5	up	149	11
hsa-miR-19b-3p	hsa-mir-19b-1	UGUGCAAAUCCAUGCAAAACUGA	3.43373	up	284	82
hsa-miR-19b-3p	hsa-mir-19b-2	UGUGCAAAUCCAUGCAAAACUGA	3.43373	up	284	82
hsa-miR-200a-3p	hsa-mir-200a	UAACACUGUCUGGUAACGAUGU	4.55556	up	40	8
hsa-miR-200b-3p	hsa-mir-200b	UAAUACUGCCUGGUAAUGAUGA	71	up	70
hsa-miR-200c-3p	hsa-mir-200c	UAAUACUGCCGGGUAAUGAUGGA	1.63158	up	30	18
hsa-miR-203a-3p	hsa-mir-203a	GUGAAAUGUUUAGGACCACUAG	3.2	up	15	4
hsa-miR-205-5p	hsa-mir-205	UCCUUCAUUCCACCGGAGUCUG	16	up	15
hsa-miR-206	hsa-mir-206	UGGAAUGUAAGGAAGUGUGUGG	11.0208	up	528	47
hsa-miR-20a-5p	hsa-mir-20a	UAAAGUGCUUAUAGUGCAGGUAG	4.70588	up	3119	662
hsa-miR-20b-5p	hsa-mir-20b	CAAAGUGCUCAUAGUGCAGGUAG	-1.41935	down	30	43
hsa-miR-21-3p	hsa-mir-21	CAACACCAGUCGAUGGGCUGU	-422	down		421
hsa-miR-21-5p	hsa-mir-21	UAGCUUAUCAGACUGAUGUUGA	2.72881	up	15616	5722
hsa-miR-210-3p	hsa-mir-210	CUGUGCGUGUGACAGCGGCUGA	2.26027	up	164	72
hsa-miR-2110	hsa-mir-2110	UUGGGGAAACGGCCGCUGAGUG	-2.4878	down	40	101
hsa-miR-2115-3p	hsa-mir-2115	CAUCAGAAUUCAUGGAGGCUAG	-12	down		11
hsa-miR-2115-5p	hsa-mir-2115	AGCUUCCAUGACUCCUGAUGGA	-13	down		12
hsa-miR-214-5p	hsa-mir-214	UGCCUGUCUACACUUGCUGUGC	-4	down		3
hsa-miR-218-5p	hsa-mir-218-1	UUGUGCUUGAUCUAACCAUGU	-5	down		4
hsa-miR-218-5p	hsa-mir-218-2	UUGUGCUUGAUCUAACCAUGU	-5	down		4
hsa-miR-219a-1-3p	hsa-mir-219a-1	AGAGUUGAGUCUGGACGUCCCG	-3	down		2
hsa-miR-219b-3p	hsa-mir-219b	AGAAUUGCGUUUGGACAAUCAGU	-3	down		2
hsa-miR-22-3p	hsa-mir-22	AAGCUGCCAGUUGAAGAACUGU	-2.91462	down	5621	16385
hsa-miR-22-5p	hsa-mir-22	AGUUCUUCAGUGGCAAGCUUUA	-14	down		13
hsa-miR-221-3p	hsa-mir-221	AGCUACAUUGUCUGCUGGGUUUC	-1.05294	down	169	178
hsa-miR-222-3p	hsa-mir-222	AGCUACAUCUGGCUACUGGGU	-1.51613	down	30	46
hsa-miR-223-3p	hsa-mir-223	UGUCAGUUUGUCAAAUACCCCA	-1.14749	down	2372	2722
hsa-miR-223-5p	hsa-mir-223	CGUGUAUUUGACAAGCUGAGUU	1.13333	up	50	44
hsa-miR-2355-3p	hsa-mir-2355	AUUGUCCUUGCUGUUUGGAGAU	-52	down		51
hsa-miR-2355-5p	hsa-mir-2355	AUCCCCAGAUACAAUGGACAA	-7	down		6
hsa-miR-23a-3p	hsa-mir-23a	AUCACAUUGCCAGGGAUUUCC	-4.60805	down	1415	6524
hsa-miR-23a-5p	hsa-mir-23a	GGGGUUCCUGGGGAUGGGAUUU	-1.19048	down	20	24
hsa-miR-23b-3p	hsa-mir-23b	AUCACAUUGCCAGGGAUUACCAC	-31	down		30
hsa-miR-24-3p	hsa-mir-24-1	UGGCUCAGUUCAGCAGGAACAG	-3.44331	down	1560	5374
hsa-miR-24-3p	hsa-mir-24-2	UGGCUCAGUUCAGCAGGAACAG	-3.44331	down	1560	5374
hsa-miR-25-3p	hsa-mir-25	CAUUGCACUUGUCUCGGUCUGA	2.81777	up	4375	1552
hsa-miR-25-5p	hsa-mir-25	AGGCGGAGACUUGGGCAAUUG	-114	down		113
hsa-miR-26a-5p	hsa-mir-26a-1	UUCAAGUAAUCCAGGAUAGGCU	5.13317	up	10753	2094
hsa-miR-26a-5p	hsa-mir-26a-2	UUCAAGUAAUCCAGGAUAGGCU	5.13317	up	10753	2094
hsa-miR-26b-5p	hsa-mir-26b	UUCAAGUAAUUCAGGAUAGGU	5.2963	up	857	161
hsa-miR-27a-3p	hsa-mir-27a	UUCACAGUGGCUAAGUUCCGC	6.26446	up	757	120
hsa-miR-27a-5p	hsa-mir-27a	AGGGCUUAGCUGCUUGUGAGCA	-522	down		521
hsa-miR-27b-3p	hsa-mir-27b	UUCACAGUGGCUAAGUUCUGC	4.08227	up	2232	546
hsa-miR-27b-5p	hsa-mir-27b	AGAGCUUAGCUGAUUGGUGAAC	-17	down		16
hsa-miR-28-3p	hsa-mir-28	CACUAGAUUGUGAGCUCCUGGA	-4.17	down	299	1250
hsa-miR-28-5p	hsa-mir-28	AAGGAGCUCACAGUCUAUUGAG	-1.33333	down	50	67
hsa-miR-29a-3p	hsa-mir-29a	UAGCACCAUCUGAAAUCGGUUA	1.8062	up	698	386
hsa-miR-29b-2-5p	hsa-mir-29b-2	CUGGUUUCACAUGGUGGCUUAG	-4	down		3
hsa-miR-29b-3p	hsa-mir-29b-1	UAGCACCAUUUGAAAUCAGUGUU	-10	down		9
hsa-miR-29b-3p	hsa-mir-29b-2	UAGCACCAUUUGAAAUCAGUGUU	-10	down		9
hsa-miR-29c-3p	hsa-mir-29c	UAGCACCAUUUGAAAUCGGUUA	3.4	up	50	14
hsa-miR-29c-5p	hsa-mir-29c	UGACCGAUUUCUCCUGGUGUUC	-8	down		7
hsa-miR-30a-3p	hsa-mir-30a	CUUUCAGUCGGAUGUUUGCAGC	9.1	up	90	9
hsa-miR-30a-5p	hsa-mir-30a	UGUAAACAUCCUCGACUGGAAG	6.11207	up	708	115
hsa-miR-30b-5p	hsa-mir-30b	UGUAAACAUCCUACACUCAGCU	3.77358	up	399	105
hsa-miR-30c-5p	hsa-mir-30c-2	UGUAAACAUCCUACACUCUCAGC	5.72464	up	394	68
hsa-miR-30c-5p	hsa-mir-30c-1	UGUAAACAUCCUACACUCUCAGC	5.72464	up	394	68
hsa-miR-30d-5p	hsa-mir-30d	UGUAAACAUCCCCGACUGGAAG	1.38868	up	1814	1306
hsa-miR-30e-3p	hsa-mir-30e	CUUUCAGUCGGAUGUUUACAGC	2.7	up	269	99
hsa-miR-30e-5p	hsa-mir-30e	UGUAAACAUCCUUGACUGGAAG	1.26016	up	309	245
hsa-miR-3120-3p	hsa-mir-3120	CACAGCAAGUGUAGACAGGCA	31	up	30
hsa-miR-3124-5p	hsa-mir-3124	UUCGCGGGCGAAGGCAAAGUC	-3	down		2
hsa-miR-3127-5p	hsa-mir-3127	AUCAGGGCUUGUGGAAUGGGAAG	-3	down		2
hsa-miR-3146	hsa-mir-3146	CAUGCUAGGAUAGAAAGAAUGG	-3	down		2
hsa-miR-3150b-3p	hsa-mir-3150b	UGAGGAGAUCGUCGAGGUUGG	-1.26829	down	40	51
hsa-miR-3158-3p	hsa-mir-3158-1	AAGGGCUUCCUCUCUGCAGGAC	-4	down		3
hsa-miR-3158-3p	hsa-mir-3158-2	AAGGGCUUCCUCUCUGCAGGAC	-4	down		3
hsa-miR-3164	hsa-mir-3164	UGUGACUUUAAGGGAAAUGGCG	-4	down		3
hsa-miR-3165	hsa-mir-3165	AGGUGGAUGCAAUGUGACCUCA	-3	down		2
hsa-miR-3173-5p	hsa-mir-3173	UGCCCUGCCUGUUUUCUCCUUU	-3	down		2
hsa-miR-3176	hsa-mir-3176	ACUGGCCUGGGACUACCGG	-6	down		5
hsa-miR-3177-3p	hsa-mir-3177	UGCACGGCACUGGGGACACGU	-19	down		18
hsa-miR-3192-5p	hsa-mir-3192	UCUGGGAGGUUGUAGCAGUGGAA	-3	down		2
hsa-miR-3198	hsa-mir-3198-1	GUGGAGUCCUGGGGAAUGGAGA	-10	down		9
hsa-miR-3198	hsa-mir-3198-2	GUGGAGUCCUGGGGAAUGGAGA	-10	down		9
hsa-miR-32-5p	hsa-mir-32	UAUUGCACAUUACUAAGUUGCA	1.4	up	20	14
hsa-miR-320a-3p	hsa-mir-320a	AAAAGCUGGGUUGAGAGGGCGA	11.9722	up	141462	11815
hsa-miR-320b	hsa-mir-320b-1	AAAAGCUGGGUUGAGAGGGCAA	-3	down		2
hsa-miR-320b	hsa-mir-320b-2	AAAAGCUGGGUUGAGAGGGCAA	-3	down		2
hsa-miR-320c	hsa-mir-320c-1	AAAAGCUGGGUUGAGAGGGU	-3	down		2
hsa-miR-320c	hsa-mir-320c-2	AAAAGCUGGGUUGAGAGGGU	-3	down		2
hsa-miR-320d	hsa-mir-320d-1	AAAAGCUGGGUUGAGAGGA	-4	down		3
hsa-miR-320d	hsa-mir-320d-2	AAAAGCUGGGUUGAGAGGA	-4	down		3
hsa-miR-324-5p	hsa-mir-324	CGCAUCCCCUAGGGCAUUGGUG	-199	down		198
hsa-miR-326	hsa-mir-326	CCUCUGGGCCCUUCCUCCAG	-15	down		14
hsa-miR-328-3p	hsa-mir-328	CUGGCCCUCUCUGCCCUUCCGU	6.76471	up	229	33
hsa-miR-330-3p	hsa-mir-330	GCAAAGCACACGGCCUGCAGAGA	-43	down		42
hsa-miR-330-5p	hsa-mir-330	UCUCUGGGCCUGUGUCUUAGGC	21	up	20
hsa-miR-331-3p	hsa-mir-331	GCCCCUGGGCCUAUCCUAGAA	-7	down		6
hsa-miR-335-5p	hsa-mir-335	UCAAGAGCAAUAACGAAAAAUGU	21	up	20
hsa-miR-338-3p	hsa-mir-338	UCCAGCAUCAGUGAUUUUGUUG	-6	down		5
hsa-miR-338-5p	hsa-mir-338	AACAAUAUCCUGGUGCUGAGUG	-3	down		2
hsa-miR-339-3p	hsa-mir-339	UGAGCGCCUCGACGACAGAGCCG	-108	down		107
hsa-miR-339-5p	hsa-mir-339	UCCCUGUCCUCCAGGAGCUCACG	6.3125	up	100	15
hsa-miR-33a-5p	hsa-mir-33a	GUGCAUUGUAGUUGCAUUGCA	31	up	30
hsa-miR-340-3p	hsa-mir-340	UCCGUCUCAGUUACUUUAUAGC	21	up	20
hsa-miR-340-5p	hsa-mir-340	UUAUAAAGCAAUGAGACUGAUU	2.01024	up	588	292
hsa-miR-342-3p	hsa-mir-342	UCUCACACAGAAAUCGCACCCGU	-19	down		18
hsa-miR-342-5p	hsa-mir-342	AGGGGUGCUAUCUGUGAUUGA	-24	down		23
hsa-miR-345-5p	hsa-mir-345	GCUGACUCCUAGUCCAGGGCUC	-39	down		38
hsa-miR-34a-5p	hsa-mir-34a	UGGCAGUGUCUUAGCUGGUUGU	-7	down		6
hsa-miR-34c-5p	hsa-mir-34c	AGGCAGUGUAGUUAGCUGAUUGC	-12	down		11
hsa-miR-361-3p	hsa-mir-361	UCCCCCAGGUGUGAUUCUGAUUU	-2.7561	down	40	112
hsa-miR-361-5p	hsa-mir-361	UUAUCAGAAUCUCCAGGGGUAC	2.44	up	60	24
hsa-miR-3611	hsa-mir-3611	UUGUGAAGAAAGAAAUUCUUA	-3	down		2
hsa-miR-3613-5p	hsa-mir-3613	UGUUGUACUUUUUUUUUUGUUC	6.13043	up	140	22
hsa-miR-3615	hsa-mir-3615	UCUCUCGGCUCCUCGCGGCUC	-8	down		7
hsa-miR-3617-3p	hsa-mir-3617	CAUCAGCACCCUAUGUCCUUUCU	-4	down		3
hsa-miR-3617-5p	hsa-mir-3617	AAAGACAUAGUUGCAAGAUGGG	-6	down		5
hsa-miR-362-3p	hsa-mir-362	AACACACCUAUUCAAGGAUUCA	-9	down		8
hsa-miR-362-5p	hsa-mir-362	AAUCCUUGGAACCUAGGUGUGAGU	-10	down		9
hsa-miR-363-3p	hsa-mir-363	AAUUGCACGGUAUCCAUCUGUA	-5.43137	down	50	276
hsa-miR-365a-3p	hsa-mir-365a	UAAUGCCCCUAAAAAUCCUUAU	16	up	15
hsa-miR-365b-3p	hsa-mir-365b	UAAUGCCCCUAAAAAUCCUUAU	16	up	15
hsa-miR-369-5p	hsa-mir-369	AGAUCGACCGUGUUAUAUUCGC	-3	down		2
hsa-miR-3690	hsa-mir-3690-1	ACCUGGACCCAGCGUAGACAAAG	-3	down		2
hsa-miR-3690	hsa-mir-3690-2	ACCUGGACCCAGCGUAGACAAAG	-3	down		2
hsa-miR-370-3p	hsa-mir-370	GCCUGCUGGGGUGGAACCUGGU	-158	down		157
hsa-miR-374a-3p	hsa-mir-374a	CUUAUCAGAUUGUAUUGUAAUU	51	up	50
hsa-miR-374a-5p	hsa-mir-374a	UUAUAAUACAACCUGAUAAGUG	53.3333	up	159	2
hsa-miR-374b-5p	hsa-mir-374b	AUAUAAUACAACCUGCUAAGUG	4.44	up	110	24
hsa-miR-375-3p	hsa-mir-375	UUUGUUCGUUCGGCUCGCGUGA	20.25	up	80	3
hsa-miR-376c-3p	hsa-mir-376c	AACAUAGAGGAAAUUCCACGU	-6	down		5
hsa-miR-378a-3p	hsa-mir-378a	ACUGGACUUGGAGUCAGAAGGC	-3.94963	down	2143	8467
hsa-miR-378a-5p	hsa-mir-378a	CUCCUGACUCCAGGUCCUGUGU	1.55	up	30	19
hsa-miR-378d	hsa-mir-378d-2	ACUGGACUUGGAGUCAGAAA	2	up	45	22
hsa-miR-378d	hsa-mir-378d-1	ACUGGACUUGGAGUCAGAAA	2	up	45	22
hsa-miR-378e	hsa-mir-378e	ACUGGACUUGGAGUCAGGA	-4	down		3
hsa-miR-378f	hsa-mir-378f	ACUGGACUUGGAGCCAGAAG	5.25	up	20	3
hsa-miR-378g	hsa-mir-378g	ACUGGGCUUGGAGUCAGAAG	-3	down		2
hsa-miR-379-5p	hsa-mir-379	UGGUAGACUAUGGAACGUAGG	-2.16129	down	30	66
hsa-miR-381-3p	hsa-mir-381	UAUACAAGGGCAAGCUCUCUGU	-3.04762	down	20	63
hsa-miR-382-5p	hsa-mir-382	GAAGUUGUUCGUGGUGGAUUCG	1.32258	up	40	30
hsa-miR-3918	hsa-mir-3918	ACAGGGCCGCAGAUGGAGACU	-8	down		7
hsa-miR-3928-3p	hsa-mir-3928	GGAGGAACCUUGGAGCUUCGGC	-10	down		9
hsa-miR-3934-5p	hsa-mir-3934	UCAGGUGUGGAAACUGAGGCAG	-5	down		4
hsa-miR-409-3p	hsa-mir-409	GAAUGUUGCUCGGUGAACCCCU	-15	down		14
hsa-miR-421	hsa-mir-421	AUCAACAGACAUUAAUUGGGCGC	-3	down		2
hsa-miR-423-3p	hsa-mir-423	AGCUCGGUCUGAGGCCCCUCAGU	-1.27921	down	658	842
hsa-miR-423-5p	hsa-mir-423	UGAGGGGCAGAGAGCGAGACUUU	-2.00994	down	1106	2224
hsa-miR-424-3p	hsa-mir-424	CAAAACGUGAGGCGCUGCUAU	-4	down		3
hsa-miR-424-5p	hsa-mir-424	CAGCAGCAAUUCAUGUUUUGAA	21	up	20
hsa-miR-425-3p	hsa-mir-425	AUCGGGAAUGUCGUGUCCGCCC	-24	down		23
hsa-miR-425-5p	hsa-mir-425	AAUGACACGAUCACUCCCGUUGA	1.04396	up	189	181
hsa-miR-4286	hsa-mir-4286	ACCCCACUCCUGGUACC	-24	down		23
hsa-miR-432-5p	hsa-mir-432	UCUUGGAGUAGGUCAUUGGGUGG	-6	down		5
hsa-miR-4443	hsa-mir-4443	UUGGAGGCGUGGGUUUU	-3	down		2
hsa-miR-4446-3p	hsa-mir-4446	CAGGGCUGGCAGUGACAUGGGU	-7	down		6
hsa-miR-4477b	hsa-mir-4477b	AUUAAGGACAUUUGUGAUUGAU	-6	down		5
hsa-miR-4489	hsa-mir-4489	UGGGGCUAGUGAUGCAGGACG	-10	down		9
hsa-miR-4504	hsa-mir-4504	UGUGACAAUAGAGAUGAACAUG	-19	down		18
hsa-miR-4505	hsa-mir-4505	AGGCUGGGCUGGGACGGA	-4	down		3
hsa-miR-4508	hsa-mir-4508	GCGGGGCUGGGCGCGCG	-10	down		9
hsa-miR-450a-5p	hsa-mir-450a-1	UUUUGCGAUGUGUUCCUAAUAU	10.25	up	40	3
hsa-miR-450a-5p	hsa-mir-450a-2	UUUUGCGAUGUGUUCCUAAUAU	10.25	up	40	3
hsa-miR-450b-5p	hsa-mir-450b	UUUUGCAAUAUGUUCCUGAAUA	41	up	40
hsa-miR-451a	hsa-mir-451a	AAACCGUUACCAUUACUGAGUU	-2.03107	down	1415	2875
hsa-miR-452-5p	hsa-mir-452	AACUGUUUGCAGAGGAAACUGA	-4	down		3
hsa-miR-455-5p	hsa-mir-455	UAUGUGCCUUUGGACUACAUCG	18.8889	up	169	8
hsa-miR-4645-3p	hsa-mir-4645	AGACAGUAGUUCUUGCCUGGUU	-4	down		3
hsa-miR-4654	hsa-mir-4654	UGUGGGAUCUGGAGGCAUCUGG	-3	down		2
hsa-miR-4664-3p	hsa-mir-4664	CUUCCGGUCUGUGAGCCCCGUC	-6	down		5
hsa-miR-4665-5p	hsa-mir-4665	CUGGGGGACGCGUGAGCGCGAGC	-3	down		2
hsa-miR-4669	hsa-mir-4669	UGUGUCCGGGAAGUGGAGGAGG	-4	down		3
hsa-miR-4676-5p	hsa-mir-4676	GAGCCAGUGGUGAGACAGUGA	-7	down		6
hsa-miR-4677-3p	hsa-mir-4677	UCUGUGAGACCAAAGAACUACU	-3	down		2
hsa-miR-4700-5p	hsa-mir-4700	UCUGGGGAUGAGGACAGUGUGU	-4	down		3
hsa-miR-4746-5p	hsa-mir-4746	CCGGUCCCAGGAGAACCUGCAGA	-3	down		2
hsa-miR-4772-3p	hsa-mir-4772	CCUGCAACUUUGCCUGAUCAGA	-14	down		13
hsa-miR-4772-5p	hsa-mir-4772	UGAUCAGGCAAAAUUGCAGACU	-86	down		85
hsa-miR-4791	hsa-mir-4791	UGGAUAUGAUGACUGAAA	-6	down		5
hsa-miR-483-5p	hsa-mir-483	AAGACGGGAGGAAAGAAGGGAG	4.42857	up	30	6
hsa-miR-484	hsa-mir-484	UCAGGCUCAGUCCCCUCCCGAU	3.21053	up	60	18
hsa-miR-486-3p	hsa-mir-486-1	CGGGGCAGCUCAGUACAGGAU	-4	down		3
hsa-miR-486-3p	hsa-mir-486-2	CGGGGCAGCUCAGUACAGGAU	-4	down		3
hsa-miR-486-5p	hsa-mir-486-1	UCCUGUACUGAGCUGCCCCGAG	2.09545	up	1382	659
hsa-miR-486-5p	hsa-mir-486-2	UCCUGUACUGAGCUGCCCCGAG	2.09545	up	1382	659
hsa-miR-490-3p	hsa-mir-490	CAACCUGGAGGACUCCAUGCUG	22.5	up	179	7
hsa-miR-491-5p	hsa-mir-491	AGUGGGGAACCCUUCCAUGAGG	-9	down		8
hsa-miR-493-3p	hsa-mir-493	UGAAGGUCUACUGUGUGCCAGG	-19	down		18
hsa-miR-493-5p	hsa-mir-493	UUGUACAUGGUAGGCUUUCAUU	31	up	30
hsa-miR-495-3p	hsa-mir-495	AAACAAACAUGGUGCACUUCUU	-4	down		3
hsa-miR-499a-5p	hsa-mir-499a	UUAAGACUUGCAGUGAUGUUU	4.5	up	35	7
hsa-miR-500a-3p	hsa-mir-500a	AUGCACCUGGGCAAGGAUUCUG	-4.74194	down	30	146
hsa-miR-501-3p	hsa-mir-501	AAUGCACCCGGGCAAGGAUUCU	-2.19355	down	30	67
hsa-miR-502-3p	hsa-mir-502	AAUGCACCUGGGCAAGGAUUCA	-4.60976	down	40	188
hsa-miR-503-5p	hsa-mir-503	UAGCAGCGGGAACAGUUCUGCAG	-6	down		5
hsa-miR-505-3p	hsa-mir-505	CGUCAACACUUGCUGGUUUCCU	-10	down		9
hsa-miR-505-5p	hsa-mir-505	GGGAGCCAGGAAGUAUUGAUGU	7	up	20	2
hsa-miR-509-3-5p	hsa-mir-509-3	UACUGCAGACGUGGCAAUCAUG	10.25	up	40	3
hsa-miR-511-3p	hsa-mir-511	AAUGUGUAGCAAAAGACAGA	-3	down		2
hsa-miR-511-5p	hsa-mir-511	GUGUCUUUUGCUCUGCAGUCA	-9	down		8
hsa-miR-5187-5p	hsa-mir-5187	UGGGAUGAGGGAUUGAAGUGGA	-6	down		5
hsa-miR-532-5p	hsa-mir-532	CAUGCCUUGAGUGUAGGACCGU	-10.1348	down	140	1428
hsa-miR-539-3p	hsa-mir-539	AUCAUACAAGGACAAUUUCUUU	-3	down		2
hsa-miR-542-3p	hsa-mir-542	UGUGACAGAUUGAUAACUGAAA	-3.43902	down	40	140
hsa-miR-542-5p	hsa-mir-542	UCGGGGAUCAUCAUGUCACGAGA	-4	down		3
hsa-miR-548ah-3p	hsa-mir-548ah	CAAAAACUGCAGUUACUUUUGC	-3	down		2
hsa-miR-548an	hsa-mir-548an	AAAAGGCAUUGUGGUUUUUG	-8	down		7
hsa-miR-548ar-3p	hsa-mir-548ar	UAAAACUGCAGUUAUUUUUGC	-3	down		2
hsa-miR-548bc	hsa-mir-548bc	AAAAACUGUGAUUACUUUUGC	-12	down		11
hsa-miR-548e-3p	hsa-mir-548e	AAAAACUGAGACUACUUUUGCA	2.1	up	20	9
hsa-miR-548j-3p	hsa-mir-548j	CAAAAACUGCAUUACUUUUGC	-10	down		9
hsa-miR-548j-5p	hsa-mir-548j	AAAAGUAAUUGCGGUCUUUGGU	-3	down		2
hsa-miR-548k	hsa-mir-548k	AAAAGUACUUGCGGAUUUUGCU	-4	down		3
hsa-miR-548o-3p	hsa-mir-548o	CCAAAACUGCAGUUACUUUUGC	-5	down		4
hsa-miR-548o-3p	hsa-mir-548o-2	CCAAAACUGCAGUUACUUUUGC	-5	down		4
hsa-miR-551a	hsa-mir-551a	GCGACCCACUCUUGGUUUCCA	-8	down		7
hsa-miR-552-3p	hsa-mir-552	AACAGGUGACUGGUUAGACAA	-3	down		2
hsa-miR-574-3p	hsa-mir-574	CACGCUCAUGCACACACCCACA	1.5	up	50	33
hsa-miR-574-5p	hsa-mir-574	UGAGUGUGUGUGUGUGAGUGUGU	-2.85714	down	20	59
hsa-miR-576-3p	hsa-mir-576	AAGAUGUGGAAAAAUUGGAAUC	-16.8095	down	20	352
hsa-miR-579-5p	hsa-mir-579	UCGCGGUUUGUGCCAGAUGACG	-4	down		3
hsa-miR-580-3p	hsa-mir-580	UUGAGAAUGAUGAAUCAUUAGG	-10	down		9
hsa-miR-582-3p	hsa-mir-582	UAACUGGUUGAACAACUGAACC	-58	down		57
hsa-miR-582-5p	hsa-mir-582	UUACAGUUGUUCAACCAGUUACU	-3	down		2
hsa-miR-584-5p	hsa-mir-584	UUAUGGUUUGCCUGGGACUGAG	-40	down		39
hsa-miR-589-5p	hsa-mir-589	UGAGAACCACGUCUGCUCUGAG	-58	down		57
hsa-miR-590-3p	hsa-mir-590	UAAUUUUAUGUAUAAGCUAGU	16	up	15
hsa-miR-597-3p	hsa-mir-597	UGGUUCUCUUGUGGCUCAAGCGU	-3	down		2
hsa-miR-598-3p	hsa-mir-598	UACGUCAUCGUUGUCAUCGUCA	-3	down		2
hsa-miR-618	hsa-mir-618	AAACUCUACUUGUCCUUCUGAGU	-4	down		3
hsa-miR-625-3p	hsa-mir-625	GACUAUAGAACUUUCCCCCUCA	5.33333	up	15	2
hsa-miR-625-5p	hsa-mir-625	AGGGGGAAAGUUCUAUAGUCC	-3	down		2
hsa-miR-628-5p	hsa-mir-628	AUGCUGACAUAUUUACUAGAGG	-3	down		2
hsa-miR-629-5p	hsa-mir-629	UGGGUUUACGUUGGGAGAACU	-11.0541	down	110	1226
hsa-miR-6501-5p	hsa-mir-6501	AGUUGCCAGGGCUGCCUUUGGU	-12	down		11
hsa-miR-6502-5p	hsa-mir-6502	AGCUCUAGAAAGAUUGUUGACC	-12	down		11
hsa-miR-6503-3p	hsa-mir-6503	GGGACUAGGAUGCAGACCUCC	-6	down		5
hsa-miR-6503-5p	hsa-mir-6503	AGGUCUGCAUUCAAAUCCCCAGA	-9	down		8
hsa-miR-651-5p	hsa-mir-651	UUUAGGAUAAGCUUGACUUUUG	5.16667	up	30	5
hsa-miR-6513-5p	hsa-mir-6513	UUUGGGAUUGACGCCACAUGUCU	-3	down		2
hsa-miR-6515-5p	hsa-mir-6515	UUGGAGGGUGUGGAAGACAUC	-10	down		9
hsa-miR-652-3p	hsa-mir-652	AAUGGCGCCACUAGGGUUGUG	-6.15508	down	747	4603
hsa-miR-654-5p	hsa-mir-654	UGGUGGGCCGCAGAACAUGUGC	-12	down		11
hsa-miR-659-5p	hsa-mir-659	AGGACCUUCCCUGAACCAAGGA	21	up	20
hsa-miR-660-5p	hsa-mir-660	UACCCAUUGCAUAUCGGAGUUG	-32	down		31
hsa-miR-664a-3p	hsa-mir-664a	UAUUCAUUUAUCCCCAGCCUACA	23.6667	up	70	2
hsa-miR-671-3p	hsa-mir-671	UCCGGUUCUCAGGGCUCCACC	-6	down		5
hsa-miR-671-5p	hsa-mir-671	AGGAAGCCCUGGAGGGGCUGGAG	1.77778	up	15	8
hsa-miR-6741-5p	hsa-mir-6741	GUGGGUGCUGGUGGGAGCCGUG	5.25	up	20	3
hsa-miR-6753-3p	hsa-mir-6753	UGGUCUGUCUCUGCCCUGGCAC	-3	down		2
hsa-miR-6767-5p	hsa-mir-6767	UCGCAGACAGGGACACAUGGAGA	-4	down		3
hsa-miR-6793-3p	hsa-mir-6793	UCCCCAACCCCUGCCCGCAG	-7	down		6
hsa-miR-6813-5p	hsa-mir-6813	CAGGGGCUGGGGUUUCAGGUUCU	-6	down		5
hsa-miR-6842-3p	hsa-mir-6842	UUGGCUGGUCUCUGCUCCGCAG	-72	down		71
hsa-miR-6842-5p	hsa-mir-6842	UGGGGGUGGUCUCUAGCCAAGG	-3	down		2
hsa-miR-6847-5p	hsa-mir-6847	ACAGAGGACAGUGGAGUGUGAGC	-4	down		3
hsa-miR-6852-5p	hsa-mir-6852	CCCUGGGGUUCUGAGGACAUG	-42	down		41
hsa-miR-6853-3p	hsa-mir-6853	UGUUCAUUGGAACCCUGCGCAG	-3	down		2
hsa-miR-6866-5p	hsa-mir-6866	UUAGAGGCUGGAAUAGAGAUUCU	-9	down		8
hsa-miR-7-5p	hsa-mir-7-1	UGGAAGACUAGUGAUUUUGUUGUU	-3.06186	down	96	296
hsa-miR-7-5p	hsa-mir-7-2	UGGAAGACUAGUGAUUUUGUUGUU	-3.06186	down	96	296
hsa-miR-7-5p	hsa-mir-7-3	UGGAAGACUAGUGAUUUUGUUGUU	-3.06186	down	96	296
hsa-miR-744-3p	hsa-mir-744	CUGUUGCCACUAACCUCAACCU	-3	down		2
hsa-miR-744-5p	hsa-mir-744	UGCGGGGCUAGGGCUAACAGCA	-9.20625	down	159	1472
hsa-miR-766-3p	hsa-mir-766	ACUCCAGCCCCACAGCCUCAGC	-37	down		36
hsa-miR-766-5p	hsa-mir-766	AGGAGGAAUUGGUGCUGGUCUU	-3	down		2
hsa-miR-769-5p	hsa-mir-769	UGAGACCUCUGGGUUCUGAGCU	-16.3462	down	25	424
hsa-miR-7706	hsa-mir-7706	UGAAGCGCCUGUGCUCUGCCGAGA	-9	down		8
hsa-miR-7974	hsa-mir-7974	AGGCUGUGAUGCUCUCCUGAGCCC	-9	down		8
hsa-miR-874-3p	hsa-mir-874	CUGCCCUGGCCCGAGGGACCGA	-4	down		3
hsa-miR-889-3p	hsa-mir-889	UUAAUAUCGGACAACCAUUGU	21	up	20
hsa-miR-9-5p	hsa-mir-9-1	UCUUUGGUUAUCUAGCUGUAUGA	-6	down		5
hsa-miR-9-5p	hsa-mir-9-2	UCUUUGGUUAUCUAGCUGUAUGA	-6	down		5
hsa-miR-9-5p	hsa-mir-9-3	UCUUUGGUUAUCUAGCUGUAUGA	-6	down		5
hsa-miR-92a-1-5p	hsa-mir-92a-1	AGGUUGGGAUCGGUUGCAAUGCU	-12	down		11
hsa-miR-92a-3p	hsa-mir-92a-1	UAUUGCACUUGUCCCGGCCUGU	5.2648	up	1689	320
hsa-miR-92a-3p	hsa-mir-92a-2	UAUUGCACUUGUCCCGGCCUGU	5.2648	up	1689	320
hsa-miR-92b-3p	hsa-mir-92b	UAUUGCACUCGUCCCGGCCUCC	5.25	up	20	3
hsa-miR-92b-5p	hsa-mir-92b	AGGGACGGGACGCGGUGCAGUG	-8	down		7
hsa-miR-93-3p	hsa-mir-93	ACUGCUGAGCUAGCACUUCCCG	-4	down		3
hsa-miR-93-5p	hsa-mir-93	CAAAGUGCUGUUCGUGCAGGUAG	-1.17311	down	1345	1578
hsa-miR-939-5p	hsa-mir-939	UGGGGAGCUGAGGCUCUGGGGGUG	41	up	40
hsa-miR-941	hsa-mir-941-1	CACCCGGCUGUGUGCACAUGUGC	-2.18182	down	32	71
hsa-miR-941	hsa-mir-941-2	CACCCGGCUGUGUGCACAUGUGC	-2.18182	down	32	71
hsa-miR-941	hsa-mir-941-3	CACCCGGCUGUGUGCACAUGUGC	-2.18182	down	32	71
hsa-miR-941	hsa-mir-941-4	CACCCGGCUGUGUGCACAUGUGC	-2.18182	down	32	71
hsa-miR-941	hsa-mir-941-5	CACCCGGCUGUGUGCACAUGUGC	-2.18182	down	32	71
hsa-miR-942-5p	hsa-mir-942	UCUUCUCUGUUUUGGCCAUGUG	-31	down		30
hsa-miR-96-5p	hsa-mir-96	UUUGGCACUAGCACAUUUUUGCU	3.875	up	30	7
hsa-miR-98-5p	hsa-mir-98	UGAGGUAGUAAGUUGUAUUGUU	4.85714	up	135	27
hsa-miR-99a-5p	hsa-mir-99a	AACCCGUAGAUCCGAUCUUGUG	-2.37037	down	80	191
hsa-miR-99b-3p	hsa-mir-99b	CAAGCUCGUGUCUGUGGGUCCG	-26	down		25
hsa-miR-99b-5p	hsa-mir-99b	CACCCGUAGAACCGACCUUGCG	-3.9901	down	100	402
hsa-miR-novel-chr10_1124	hsa-mir-novel-chr10_1124	ACUCGGCGUGGCGUCGGUCGUGG	2.05697	up	1046	508
hsa-miR-novel-chr10_1255	hsa-mir-novel-chr10_1255	UUCCUAUGCAUAUACUUCUUU	-3	down		2
hsa-miR-novel-chr10_1266	hsa-mir-novel-chr10_1266	UUCGGGCUGGCCUGCUGCUCCGGA	-3	down		2
hsa-miR-novel-chr10_142	hsa-mir-novel-chr10_142	AGCCUGGAAGCUGGAGCCUGCA	-6	down		5
hsa-miR-novel-chr10_143	hsa-mir-novel-chr10_143	CAAGGACUGCAAUUACUUUUGC	61	up	60
hsa-miR-novel-chr10_25	hsa-mir-novel-chr10_25	CCUCCCACUGCAGAGCCUG	-4	down		3
hsa-miR-novel-chr10_472	hsa-mir-novel-chr10_472	UCAGGUCUUCAGACUGUGG	-10	down		9
hsa-miR-novel-chr10_490	hsa-mir-novel-chr10_490	AAGGGAAAGGUAAGAAGAAAUG	-7	down		6
hsa-miR-novel-chr10_724	hsa-mir-novel-chr10_724	ACCCCUUCGGCUGCUGGGCC	-7	down		6
hsa-miR-novel-chr11_1722	hsa-mir-novel-chr11_1722	UCCCUGCCCCAUGACCCCGACA	-4	down		3
hsa-miR-novel-chr11_1820	hsa-mir-novel-chr11_1820	AAAAGUACUUGCGGAUUUUG	-9	down		8
hsa-miR-novel-chr11_2096	hsa-mir-novel-chr11_2096	UUUGGGUGGGACAGACAGAAGACA	-6	down		5
hsa-miR-novel-chr11_2188	hsa-mir-novel-chr11_2188	CUGUGCGUGUGACAGCGGCUGAU	-15	down		14
hsa-miR-novel-chr11_2543	hsa-mir-novel-chr11_2543	CUGACCUAUGAAUUGACAGC	1.55689	up	259	166
hsa-miR-novel-chr11_2571	hsa-mir-novel-chr11_2571	GCAUUGGAGGCUUUGGCAAGGUGU	-4	down		3
hsa-miR-novel-chr11_2812	hsa-mir-novel-chr11_2812	AAUGUGGACUGGUGUGACC	-4	down		3
hsa-miR-novel-chr11_2881	hsa-mir-novel-chr11_2881	GAGGGGCAGAGAGCGAG	-13	down		12
hsa-miR-novel-chr12_3257	hsa-mir-novel-chr12_3257	GCACAUGUAAGCUGACUGAA	-6	down		5
hsa-miR-novel-chr12_3271	hsa-mir-novel-chr12_3271	GGUUCCAUAGUGUAGUGGU	-3	down		2
hsa-miR-novel-chr12_3797	hsa-mir-novel-chr12_3797	UCUCUUCCAGGGUGGCUCUCAAC	-4	down		3
hsa-miR-novel-chr12_3814	hsa-mir-novel-chr12_3814	CAGCUUUCUGUAGCAGAGAUCA	-6	down		5
hsa-miR-novel-chr12_3822	hsa-mir-novel-chr12_3822	CAGCUUUCUGUAGCAGAGAUCA	-6	down		5
hsa-miR-novel-chr13_4295	hsa-mir-novel-chr13_4295	GAGAGAGGUUGAUCUUGCUGU	-4	down		3
hsa-miR-novel-chr14_5243	hsa-mir-novel-chr14_5243	UGGGCCAGAUGAAGUGGGAAC	31	up	30
hsa-miR-novel-chr14_5271	hsa-mir-novel-chr14_5271	GAAGCUCAGAGGGCUCUGAUUC	4.2	up	20	4
hsa-miR-novel-chr14_5395	hsa-mir-novel-chr14_5395	UGGGGCUGUGUCACUGUGGGU	-8	down		7
hsa-miR-novel-chr14_5476	hsa-mir-novel-chr14_5476	AACACAAGGUAUUGGUAUUAC	-3	down		2
hsa-miR-novel-chr14_5692	hsa-mir-novel-chr14_5692	CCGGAGUUGUAAGUGUUGACA	-6	down		5
hsa-miR-novel-chr14_5713	hsa-mir-novel-chr14_5713	GUGUUGCUGUGGAUGACGU	-4	down		3
hsa-miR-novel-chr15_6007	hsa-mir-novel-chr15_6007	UGGACUUGGAGUCAGAAG	1.92	up	47	24
hsa-miR-novel-chr15_6178	hsa-mir-novel-chr15_6178	ACCCGGGAGUAGGAGACUCAGA	-14	down		13
hsa-miR-novel-chr15_6254	hsa-mir-novel-chr15_6254	UGGGAAUGGAUUGAUUGG	-6	down		5
hsa-miR-novel-chr15_6361	hsa-mir-novel-chr15_6361	UGGGCCAGACUAAGCUGGGGC	-7	down		6
hsa-miR-novel-chr15_6455	hsa-mir-novel-chr15_6455	GCUGCAGGGAGGAGGGUG	-3	down		2
hsa-miR-novel-chr15_6459	hsa-mir-novel-chr15_6459	UUGCUGUGAUGAUGUUCUGAGCUC	-10	down		9
hsa-miR-novel-chr15_6553	hsa-mir-novel-chr15_6553	GGGGCUGGAGAGAUGGC	13.1	up	130	9
hsa-miR-novel-chr15_6643	hsa-mir-novel-chr15_6643	UGGGUUUACGUUGGGAGAACUU	-2.52505	down	538	1360
hsa-miR-novel-chr15_6683	hsa-mir-novel-chr15_6683	CCUUCCUGUGGGACUCAGGG	-4	down		3
hsa-miR-novel-chr15_6741	hsa-mir-novel-chr15_6741	UGUAGGCUGAUGUUGAUACUG	-9	down		8
hsa-miR-novel-chr16_6933	hsa-mir-novel-chr16_6933	CCUCAGGCUGUAAGUGCAGGCAGA	-12	down		11
hsa-miR-novel-chr16_6954	hsa-mir-novel-chr16_6954	GAGCUUGUCGGAUGUGCAGAUU	-7	down		6
hsa-miR-novel-chr16_7382	hsa-mir-novel-chr16_7382	AGGAGAGCUCUGGUGGCCCCU	-4	down		3
hsa-miR-novel-chr16_7412	hsa-mir-novel-chr16_7412	UCUGGGCACAGGCGGAUGGAC	-4	down		3
hsa-miR-novel-chr16_7734	hsa-mir-novel-chr16_7734	CAACUGAGGUGUGCGGGCUGG	-7	down		6
hsa-miR-novel-chr16_7808	hsa-mir-novel-chr16_7808	AGAGUGGGACUGAAGGUUAAGU	-6	down		5
hsa-miR-novel-chr16_7839	hsa-mir-novel-chr16_7839	GCAGGACGGUGGCCAUG	-12.45	down	319	3983
hsa-miR-novel-chr16_7844	hsa-mir-novel-chr16_7844	UGGAAGGGAUUGAAGACU	-4	down		3
hsa-miR-novel-chr17_8174	hsa-mir-novel-chr17_8174	CGGCCGCGGCGGAACCGG	-6	down		5
hsa-miR-novel-chr17_8235	hsa-mir-novel-chr17_8235	AUGCCCCUAAAAAUCCUUA	-3	down		2
hsa-miR-novel-chr17_8277	hsa-mir-novel-chr17_8277	ACUUGGGUGGUGGGACUGGAG	-3	down		2
hsa-miR-novel-chr17_8278	hsa-mir-novel-chr17_8278	ACUUGGGUGGUGGGACUGGAG	-3	down		2
hsa-miR-novel-chr17_8314	hsa-mir-novel-chr17_8314	UGGAGCCAGGCUGAGAAGGGGUG	-4	down		3
hsa-miR-novel-chr17_8327	hsa-mir-novel-chr17_8327	ACGUGGACUCCAGACUCUCUGUG	-10	down		9
hsa-miR-novel-chr17_8506	hsa-mir-novel-chr17_8506	UAGCUUAUCAGACUGAUGUUGAC	-1.37727	down	30121	41485
hsa-miR-novel-chr17_8597	hsa-mir-novel-chr17_8597	CUGGGAUGAGAUGAGACUGGAG	31	up	30
hsa-miR-novel-chr17_8749	hsa-mir-novel-chr17_8749	AAGCCUGGGGAGGACUGUGGCA	-7	down		6
hsa-miR-novel-chr17_8960	hsa-mir-novel-chr17_8960	CAGGCCUGGCUGGGCUCCCUGGA	-11	down		10
hsa-miR-novel-chr17_9261	hsa-mir-novel-chr17_9261	UACCCUGUAGAUCCGAAUUUGU	5.92857	up	663	111
hsa-miR-novel-chr17_9326	hsa-mir-novel-chr17_9326	UGCCUGGGAUAGGAAGUGAGG	-7	down		6
hsa-miR-novel-chr17_9375	hsa-mir-novel-chr17_9375	AGCAGGUCACGACUCAGG	-4	down		3
hsa-miR-novel-chr17_9421	hsa-mir-novel-chr17_9421	AAGAUGGCGGCUGAAGGCG	-11	down		10
hsa-miR-novel-chr18_10018	hsa-mir-novel-chr18_10018	AGAGACUGGGGAGAAACC	31	up	30
hsa-miR-novel-chr18_10094	hsa-mir-novel-chr18_10094	AAGUUCCGGAAGGGAGGCUG	-3	down		2
hsa-miR-novel-chr18_9692	hsa-mir-novel-chr18_9692	CGGGCCAGGGCCGAGCGG	-4	down		3
hsa-miR-novel-chr18_9956	hsa-mir-novel-chr18_9956	CCAGGCUGCACCAGGCUGG	-6	down		5
hsa-miR-novel-chr19_10159	hsa-mir-novel-chr19_10159	UUGGAGGUUGUAGGACCGGCG	-8	down		7
hsa-miR-novel-chr19_10327	hsa-mir-novel-chr19_10327	AUGGUUUGGGUGUGAAUUCCGG	-11	down		10
hsa-miR-novel-chr19_10393	hsa-mir-novel-chr19_10393	ACAGAGGACAGCAGGCUG	-6	down		5
hsa-miR-novel-chr19_10404	hsa-mir-novel-chr19_10404	CGCAAGCGGCUGCGGAACCGGCUGG	-7	down		6
hsa-miR-novel-chr19_10422	hsa-mir-novel-chr19_10422	GUUCCUGCUGAACUGAGCCAGU	-3	down		2
hsa-miR-novel-chr19_10425	hsa-mir-novel-chr19_10425	ACCAUCGACCGUUGAGUGGAC	-35	down		34
hsa-miR-novel-chr19_10726	hsa-mir-novel-chr19_10726	UGAGACCUCUGGGUUCUGAG	-1.45902	down	548	800
hsa-miR-novel-chr19_11076	hsa-mir-novel-chr19_11076	CAUGCUGUGGUUGCUUUG	-8	down		7
hsa-miR-novel-chr19_11078	hsa-mir-novel-chr19_11078	CAUGCUGUGGUUGCUUUG	-8	down		7
hsa-miR-novel-chr19_11210	hsa-mir-novel-chr19_11210	GCCGGGACUGUGCCCAGGGCU	-4	down		3
hsa-miR-novel-chr19_11224	hsa-mir-novel-chr19_11224	CCUGCCUGUGUACCACUCC	-6	down		5
hsa-miR-novel-chr19_11567	hsa-mir-novel-chr19_11567	UGAGGAGGAUCUGAAGGAUUGG	-11	down		10
hsa-miR-novel-chr1_11665	hsa-mir-novel-chr1_11665	GCGAAGCGGUGGCUGGGCUG	-10	down		9
hsa-miR-novel-chr1_11715	hsa-mir-novel-chr1_11715	GCUGCAGGGAGGAGGGUG	-3	down		2
hsa-miR-novel-chr1_12864	hsa-mir-novel-chr1_12864	UCCUUCAUUCCACCGGAGUCU	-3	down		2
hsa-miR-novel-chr1_13193	hsa-mir-novel-chr1_13193	CCCGGGACUGGAGGGUGAGUGACGG	-4	down		3
hsa-miR-novel-chr1_13201	hsa-mir-novel-chr1_13201	UGGUCACUGCGAACGGGCA	-4	down		3
hsa-miR-novel-chr1_13277	hsa-mir-novel-chr1_13277	AGGAGCUGAAGGAGCUGAU	-3	down		2
hsa-miR-novel-chr1_13587	hsa-mir-novel-chr1_13587	GCCCGGACUGGCCGGAGGCGCG	-6	down		5
hsa-miR-novel-chr1_14120	hsa-mir-novel-chr1_14120	CAGCCUCUGCAGCUCCCCGG	-6	down		5
hsa-miR-novel-chr1_14381	hsa-mir-novel-chr1_14381	AACAUUCAUUGCUGUCGGUGG	-1.52381	down	20	31
hsa-miR-novel-chr1_14398	hsa-mir-novel-chr1_14398	UUCAUGAGAGUUGGAUUCUCUG	-6	down		5
hsa-miR-novel-chr20_14682	hsa-mir-novel-chr20_14682	UUGUGAAUGGGGGAACAUAG	-10	down		9
hsa-miR-novel-chr20_14848	hsa-mir-novel-chr20_14848	CCCUGGAUGUACAGAUGAAG	-4	down		3
hsa-miR-novel-chr20_14983	hsa-mir-novel-chr20_14983	UUGGUCCCCUUCAACCAGCUGU	7.1875	up	229	31
hsa-miR-novel-chr20_15063	hsa-mir-novel-chr20_15063	AAGGUCUCUCGCCGGGCUGGG	-10	down		9
hsa-miR-novel-chr20_15173	hsa-mir-novel-chr20_15173	ACCCUAGGUAGACUCCAG	-4	down		3
hsa-miR-novel-chr20_15318	hsa-mir-novel-chr20_15318	UGGACGUUUCUGGGGCCUCA	-4	down		3
hsa-miR-novel-chr21_15906	hsa-mir-novel-chr21_15906	UCUCUGGGCCUGUGUCUU	-4	down		3
hsa-miR-novel-chr21_16177	hsa-mir-novel-chr21_16177	ACCUGUAGGACUCAGAUGUG	-4	down		3
hsa-miR-novel-chr22_16470	hsa-mir-novel-chr22_16470	GAGCAGGCUCCGGGGGACAGG	-3	down		2
hsa-miR-novel-chr22_16514	hsa-mir-novel-chr22_16514	UGGGCUUUUUGAGAACAAGGACU	-4	down		3
hsa-miR-novel-chr22_16567	hsa-mir-novel-chr22_16567	UGCCUGGGCUGCGGUCGGGAG	-4	down		3
hsa-miR-novel-chr22_16632	hsa-mir-novel-chr22_16632	AUGACUGAGUGAAGUGCUU	-4	down		3
hsa-miR-novel-chr22_16646	hsa-mir-novel-chr22_16646	UGGGGGGCGGUGCUGGGGCCCAGA	-3	down		2
hsa-miR-novel-chr22_16838	hsa-mir-novel-chr22_16838	UCCUCGUCCCUCGGGCCCGUGGC	-7	down		6
hsa-miR-novel-chr22_16845	hsa-mir-novel-chr22_16845	AGGACCUUCCCUGAACCAAGG	-6	down		5
hsa-miR-novel-chr22_16881	hsa-mir-novel-chr22_16881	AUCUGUUCCCUGGGCUGGAAGUG	-8	down		7
hsa-miR-novel-chr2_17080	hsa-mir-novel-chr2_17080	AGGGAGAUGAAGAGGAC	41	up	40
hsa-miR-novel-chr2_17233	hsa-mir-novel-chr2_17233	UGGGAGAAAAGAAAGGGG	31	up	30
hsa-miR-novel-chr2_17303	hsa-mir-novel-chr2_17303	CUCCGGGUUCUGUCACUGUG	-4	down		3
hsa-miR-novel-chr2_17314	hsa-mir-novel-chr2_17314	GGUGGGACUGGAAGCGUCAG	-8	down		7
hsa-miR-novel-chr2_17350	hsa-mir-novel-chr2_17350	AUCCUAGCUUGCCUGAGACUG	-23	down		22
hsa-miR-novel-chr2_17520	hsa-mir-novel-chr2_17520	CUGCUGGGAGAACUGGAG	-6	down		5
hsa-miR-novel-chr2_17740	hsa-mir-novel-chr2_17740	UACCCUGUAGAACCGAAUUUGU	9.12766	up	857	93
hsa-miR-novel-chr2_18242	hsa-mir-novel-chr2_18242	CGACUGGGCGAGUGGAGGCUCC	-8	down		7
hsa-miR-novel-chr2_18413	hsa-mir-novel-chr2_18413	UCUCCGCCACCUCCACCGCGGCU	-3	down		2
hsa-miR-novel-chr2_18414	hsa-mir-novel-chr2_18414	UCUCCGCCACCUCCACCGCGGCU	-3	down		2
hsa-miR-novel-chr2_18595	hsa-mir-novel-chr2_18595	AAGGGCAGGGACUGCACGGG	31	up	30
hsa-miR-novel-chr2_18987	hsa-mir-novel-chr2_18987	AGGGCUGGACUCAGCGGCGGAGC	-3	down		2
hsa-miR-novel-chr2_19021	hsa-mir-novel-chr2_19021	AUGAGCCUGUGGCUUUGAGGACG	-9	down		8
hsa-miR-novel-chr3_19123	hsa-mir-novel-chr3_19123	GGGGAAGAAUGAAUGAGGA	-6	down		5
hsa-miR-novel-chr3_19235	hsa-mir-novel-chr3_19235	AACUGUGGAGUGAGAAG	-8	down		7
hsa-miR-novel-chr3_19276	hsa-mir-novel-chr3_19276	CUCAGAGGAGCUGGCAGAG	-4	down		3
hsa-miR-novel-chr3_19732	hsa-mir-novel-chr3_19732	AAAGCAGGAUUCAGACUACA	-17	down		16
hsa-miR-novel-chr3_19740	hsa-mir-novel-chr3_19740	CCCUUGGACUUUUGCUGAAGUG	-17	down		16
hsa-miR-novel-chr3_19865	hsa-mir-novel-chr3_19865	AACUGCUGGAACCCACUGAGC	-19	down		18
hsa-miR-novel-chr3_19892	hsa-mir-novel-chr3_19892	GGGGCCGAGGGAGCGAG	-8	down		7
hsa-miR-novel-chr3_19975	hsa-mir-novel-chr3_19975	AUUCCCAGGGAAGUGCUCUGAU	-4	down		3
hsa-miR-novel-chr3_20007	hsa-mir-novel-chr3_20007	ACGAACUGCAAGGUCUGAAGU	-8	down		7
hsa-miR-novel-chr3_20315	hsa-mir-novel-chr3_20315	GGGCAUACUCGUAGACCUUGCCUGA	-6	down		5
hsa-miR-novel-chr4_20569	hsa-mir-novel-chr4_20569	GUGGCACUGGGAAUGUGG	-8	down		7
hsa-miR-novel-chr4_20606	hsa-mir-novel-chr4_20606	ACUUUGUGUGAGGACUUUGGU	-36	down		35
hsa-miR-novel-chr4_20636	hsa-mir-novel-chr4_20636	ACCGGGCACUGUGUGGCGUG	-4	down		3
hsa-miR-novel-chr4_21199	hsa-mir-novel-chr4_21199	AGAUGGGGAGAACUCAAUCCU	-6	down		5
hsa-miR-novel-chr4_21437	hsa-mir-novel-chr4_21437	AGGGGCUGUUUGGAGAGAC	-6	down		5
hsa-miR-novel-chr5_21721	hsa-mir-novel-chr5_21721	AGAGCUGGGGAAGACGCUG	21	up	20
hsa-miR-novel-chr5_21729	hsa-mir-novel-chr5_21729	UAACUGGUUGAACAACUG	-3	down		2
hsa-miR-novel-chr5_21978	hsa-mir-novel-chr5_21978	AGUGGGAGGACUGUCCAGGUG	-8	down		7
hsa-miR-novel-chr5_22142	hsa-mir-novel-chr5_22142	AAAGAACUUUGAAAAGAG	61	up	60
hsa-miR-novel-chr5_22289	hsa-mir-novel-chr5_22289	CACGGAGCUCUGUGUGAACGG	-6	down		5
hsa-miR-novel-chr5_22357	hsa-mir-novel-chr5_22357	GGGGAUGUAGCUCAGUGGU	-5.06931	down	100	511
hsa-miR-novel-chr5_22400	hsa-mir-novel-chr5_22400	CUCUUCAGGAUCUGUGGGUAGC	-4	down		3
hsa-miR-novel-chr5_22445	hsa-mir-novel-chr5_22445	UCUUGGGCCCCACCCCUGGAGA	-4	down		3
hsa-miR-novel-chr5_22617	hsa-mir-novel-chr5_22617	UCUGGGGUCUGGCAAAGAGGAUG	-6	down		5
hsa-miR-novel-chr5_22806	hsa-mir-novel-chr5_22806	AGACUGGGCAUAGUCUGAGACAC	-4	down		3
hsa-miR-novel-chr5_22954	hsa-mir-novel-chr5_22954	UCCGGUGUGGAGUCUGGAGACGA	-7	down		6
hsa-miR-novel-chr5_22983	hsa-mir-novel-chr5_22983	AUCUGAAAUCUGAUGAGAAAUU	-4	down		3
hsa-miR-novel-chr6_23477	hsa-mir-novel-chr6_23477	GUGGCUGGGGGAAAGGCGGG	-4	down		3
hsa-miR-novel-chr6_23498	hsa-mir-novel-chr6_23498	UCAGGUGUGGAAACUGAGGCAGG	-6	down		5
hsa-miR-novel-chr6_23941	hsa-mir-novel-chr6_23941	GCUGGAGGGAGGCUGGGCG	31	up	30
hsa-miR-novel-chr6_24135	hsa-mir-novel-chr6_24135	GGGGGUGUAGCUCAGUGGU	-175	down		174
hsa-miR-novel-chr7_24860	hsa-mir-novel-chr7_24860	AGUGCCUGAGGGAGUAAGAGC	-13	down		12
hsa-miR-novel-chr7_24866	hsa-mir-novel-chr7_24866	AGUGCCUGAGGGAGUAAGAGC	-13	down		12
hsa-miR-novel-chr7_24975	hsa-mir-novel-chr7_24975	CCUGCUCUGUGACUCUGAGACA	-3	down		2
hsa-miR-novel-chr7_25009	hsa-mir-novel-chr7_25009	UUUGUCUGUGCCUGCAGG	-6	down		5
hsa-miR-novel-chr7_25390	hsa-mir-novel-chr7_25390	AGUUGGUCCGAGUGUUGUGG	-27.245	down	648	17681
hsa-miR-novel-chr7_25414	hsa-mir-novel-chr7_25414	AGGAAGCCCUGGAGGGGCUGGAGG	3.13514	up	115	36
hsa-miR-novel-chr7_25437	hsa-mir-novel-chr7_25437	UGGAAUGGCCUGAAGGUGGA	-17	down		16
hsa-miR-novel-chr7_25490	hsa-mir-novel-chr7_25490	UGAGCGCCUCGACGACAGAGC	-2.44444	down	35	87
hsa-miR-novel-chr7_25563	hsa-mir-novel-chr7_25563	AGGGCUGUGGGGCAGGGA	-7	down		6
hsa-miR-novel-chr7_25708	hsa-mir-novel-chr7_25708	CCUGCUCUGUGACUCUGAGACA	-3	down		2
hsa-miR-novel-chr7_26019	hsa-mir-novel-chr7_26019	UUUGGCAAUGGUAGAACUCACA	-3.54348	down	45	162
hsa-miR-novel-chr7_26023	hsa-mir-novel-chr7_26023	AUGGCACUGGUAGAAUUCACUG	-1.60784	down	50	81
hsa-miR-novel-chr8_26363	hsa-mir-novel-chr8_26363	AAAAGCUGGGUUGAGAGG	2.42857	up	16	6
hsa-miR-novel-chr8_26516	hsa-mir-novel-chr8_26516	UGGGCUGCGUCAGGCUGAGC	-11	down		10
hsa-miR-novel-chr8_26580	hsa-mir-novel-chr8_26580	ACUGGGAUUGUCCAUCAUGAUG	-6	down		5
hsa-miR-novel-chr8_26767	hsa-mir-novel-chr8_26767	AGAUGAGGCAGGCUCUGCUACGU	-4	down		3
hsa-miR-novel-chr8_26792	hsa-mir-novel-chr8_26792	UGGGAAUGAGGCUUUGGGCGACA	-7	down		6
hsa-miR-novel-chr8_26817	hsa-mir-novel-chr8_26817	AGAGGCUGUUUCUGAGCU	-7.71429	down	20	161
hsa-miR-novel-chr8_26918	hsa-mir-novel-chr8_26918	GUGAACUAUGCCUGGGC	-1.61905	down	20	33
hsa-miR-novel-chr8_27018	hsa-mir-novel-chr8_27018	GUGGGCUUAGAUCAGGUCUGUUCC	-4	down		3
hsa-miR-novel-chr8_27145	hsa-mir-novel-chr8_27145	AGCACUUGUGGAUGCUGAG	-6	down		5
hsa-miR-novel-chr9_27483	hsa-mir-novel-chr9_27483	UGGGGCUGUGGUGGCCAGA	31	up	30
hsa-miR-novel-chr9_27523	hsa-mir-novel-chr9_27523	AUCACAUUGCCAGGGAUU	-51.7419	down	30	1603
hsa-miR-novel-chr9_27922	hsa-mir-novel-chr9_27922	AACGGAUGGCUCUGCCCA	-4	down		3
hsa-miR-novel-chr9_28118	hsa-mir-novel-chr9_28118	GUUCCUGCUGAACUGAGCCAGU	-3	down		2
hsa-miR-novel-chr9_28145	hsa-mir-novel-chr9_28145	CUGUGUCGGGCAUUACCAGAA	-6	down		5
hsa-miR-novel-chr9_28240	hsa-mir-novel-chr9_28240	ACAGUAGUCUGCACAUUGGUU	2.78169	up	394	141
hsa-miR-novel-chr9_28270	hsa-mir-novel-chr9_28270	AUUUUGCUGUGGAGCGGCG	-7	down		6
hsa-miR-novel-chrX_28480	hsa-mir-novel-chrX_28480	AUCCUAGCUUGCCUGAGACUG	-23	down		22
hsa-miR-novel-chrX_29044	hsa-mir-novel-chrX_29044	AGCUACAUUGUCUGCUGGGUUUCA	-6	down		5
hsa-miR-novel-chrX_29172	hsa-mir-novel-chrX_29172	ACUCCAGCCCCACAGCCUCAG	-23	down		22
hsa-miR-novel-chrX_29247	hsa-mir-novel-chrX_29247	UUUUGCGAUGUGUUCCUAAU	2.66667	up	23	8

## Sheet: paired.Experiment_vs_Control
Table V. miRNA expression for Experiment vs Control Column A: Mature miRNA, the mature miRNA name. Column B: Pre-miRNA, the pre-miRNA name. Column C: Sequence, the mature miRNA sequence. Column D: Fold change, Fold change between two groups. Column E: P-value, P-value is calculated by paired t-test. Column F: FDR, BH-adjusted P-value. Column G: Regulation, 'up' indicates up-regulation, and 'down'…
miRNA Information			Statistics & Regulation				Mean		Tag counts (normalized)
mature-miRNA	pre-miRNA	mature-sequence	Fold Change	P-value	FDR	Regulation	group Experiment	group Control	After-1	After-2	After-3	Before-1	Before-2	Before-3
hsa-miR-451a	hsa-mir-451a	AAACCGUUACCAUUACUGAGUU	-2.54267	0.00137647	0.504038	down	882.667	2244.33	723	507	1415	2056	1799	2875
hsa-miR-484	hsa-mir-484	UCAGGCUCAGUCCCCUCCCGAU	3.64706	0.0014782	0.504038	up	62	17	45	78	60		30	18
hsa-miR-novel-chr15_6643	hsa-mir-novel-chr15_6643	UGGGUUUACGUUGGGAGAACUU	-4.63538	0.0046504	0.504038	down	216.667	1004.33	57	52	538	739	911	1360
hsa-miR-novel-chr7_25437	hsa-mir-novel-chr7_25437	UGGAAUGGCCUGAAGGUGGA	-15.3333	0.00695754	0.504038	down	1	15.3333				12	15	16
hsa-miR-339-5p	hsa-mir-339	UCCCUGUCCUCCAGGAGCUCACG	2.42763	0.0106166	0.504038	up	123	50.6667	136	130	100	77	57	15
hsa-miR-30a-3p	hsa-mir-30a	CUUUCAGUCGGAUGUUUGCAGC	3.97701	0.0135963	0.504038	up	115.333	29	136	117	90	30	45	9
hsa-miR-501-3p	hsa-mir-501	AAUGCACCCGGGCAAGGAUUCU	-3.90909	0.0192843	0.504038	down	11	43			30	36	23	67
hsa-miR-361-5p	hsa-mir-361	UUAUCAGAAUCUCCAGGGGUAC	2.96	0.0211088	0.504038	up	74	25	68	91	60	18	30	24
hsa-miR-106b-3p	hsa-mir-106b	CCGCACUGUGGGUACUUGCUGC	2.34328	0.0225472	0.504038	up	52.3333	22.3333	45	39	70	18		46
hsa-miR-30b-5p	hsa-mir-30b	UGUAAACAUCCUACACUCAGCU	1.87591	0.0235185	0.504038	up	514	274	633	507	399	465	249	105
hsa-miR-200a-3p	hsa-mir-200a	UAACACUGUCUGGUAACGAUGU	1.9125	0.0240607	0.504038	up	51	26.6667	45	65	40	24	45	8
hsa-miR-652-3p	hsa-mir-652	AAUGGCGCCACUAGGGUUGUG	-8.39885	0.0284382	0.504038	down	405.333	3404.33	362	104	747	2432	3175	4603
hsa-miR-novel-chr5_22142	hsa-mir-novel-chr5_22142	AAAGAACUUUGAAAAGAG	7.77273	0.037065	0.504038	up	114	14.6667	136	143	60	18	23
hsa-miR-370-3p	hsa-mir-370	GCCUGCUGGGGUGGAACCUGGU	-10.2917	0.0398406	0.504038	down	16	164.667	45			137	197	157
hsa-miR-1307-3p	hsa-mir-1307	ACUCGGCGUGGCGUCGGUCGUG	-2.825	0.0428055	0.504038	down	66.6667	188.333		137	60	119	215	228
hsa-miR-18a-5p	hsa-mir-18a	UAAGGUGCAUCUAGUGCAGAUAG	2.02703	0.0454149	0.504038	up	75	37	90	52	80	66	15	27
hsa-let-7b-5p	hsa-let-7b	UGAGGUAGUAGGUUGUGUGGUU	-2.00817	0.0466217	0.504038	down	1998.33	4013	2079	754	3159	3236	2956	5844
hsa-miR-novel-chr17_8506	hsa-mir-novel-chr17_8506	UAGCUUAUCAGACUGAUGUUGAC	-1.39952	0.0570448	0.504038	down	22892.3	32038.3	24364	14189	30121	35858	18769	41485
hsa-miR-2110	hsa-mir-2110	UUGGGGAAACGGCCGCUGAGUG	-8.74419	0.0593108	0.504038	down	14.3333	125.333			40	113	159	101
hsa-miR-novel-chr9_28240	hsa-mir-novel-chr9_28240	ACAGUAGUCUGCACAUUGGUU	1.82687	0.0644894	0.504038	up	471.333	258	633	384	394	347	283	141
hsa-miR-novel-chr17_9261	hsa-mir-novel-chr17_9261	UACCCUGUAGAUCCGAAUUUGU	2.72368	0.0671228	0.504038	up	1104	405.333	1593	1053	663	516	586	111
hsa-miR-novel-chr7_26019	hsa-mir-novel-chr7_26019	UUUGGCAAUGGUAGAACUCACA	-5.79167	0.0688641	0.504038	down	16	92.6667			45	45	68	162
hsa-miR-499a-5p	hsa-mir-499a	UUAAGACUUGCAGUGAUGUUU	2.46939	0.0690866	0.504038	up	40.3333	16.3333	57	26	35	24	15	7
hsa-miR-101-3p	hsa-mir-101-1	UACAGUACUGUGAUAACUGAA	-4.83393	0.0745388	0.504038	down	654.333	3163	373	137	1450	2706	1485	5295
hsa-miR-101-3p	hsa-mir-101-2	UACAGUACUGUGAUAACUGAA	-4.83393	0.0745388	0.504038	down	654.333	3163	373	137	1450	2706	1485	5295
hsa-miR-novel-chrX_29044	hsa-mir-novel-chrX_29044	AGCUACAUUGUCUGCUGGGUUUCA	-10.6667	0.0797128	0.504038	down	1	10.6667				9	15	5
hsa-miR-542-3p	hsa-mir-542	UGUGACAGAUUGAUAACUGAAA	-5.34884	0.0805786	0.504038	down	14.3333	76.6667			40	45	42	140
hsa-miR-206	hsa-mir-206	UGGAAUGUAAGGAAGUGUGUGG	3.25198	0.0840031	0.504038	up	684	210.333	1040	481	528	316	265	47
hsa-miR-182-5p	hsa-mir-182	UUUGGCAAUGGUAGAACUCACACU	-5.67857	0.0842295	0.504038	down	9.33333	53			25	18	49	89
hsa-let-7d-5p	hsa-let-7d	AGAGGUAGUAGGUUGCAUAGUU	2.55612	0.0916881	0.504038	up	2027	793	3051	1353	1674	1168	854	354
hsa-miR-1-3p	hsa-mir-1-2	UGGAAUGUAAAGAAGUAUGUAU	2.56764	0.09724	0.504038	up	1809.33	704.667	2622	1483	1320	909	1054	148
hsa-miR-1-3p	hsa-mir-1-1	UGGAAUGUAAAGAAGUAUGUAU	2.56764	0.09724	0.504038	up	1809.33	704.667	2622	1483	1320	909	1054	148
hsa-miR-novel-chr20_14983	hsa-mir-novel-chr20_14983	UUGGUCCCCUUCAACCAGCUGU	3.07023	0.0976667	0.504038	up	306	99.6667	452	234	229	121	144	31
hsa-let-7c-5p	hsa-let-7c	UGAGGUAGUAGGUUGUAUGGUU	2.67913	0.0992612	0.504038	up	1361	508	1944	1040	1096	632	726	163
hsa-miR-328-3p	hsa-mir-328	CUGGCCCUCUCUGCCCUUCCGU	3.11799	0.100098	0.504038	up	352.333	113	565	260	229	167	136	33
hsa-miR-novel-chr19_10726	hsa-mir-novel-chr19_10726	UGAGACCUCUGGGUUCUGAG	-4.51982	0.100272	0.504038	down	227	1026		130	548	1103	1172	800
hsa-miR-130b-3p	hsa-mir-130b	CAGUGCAAUGAUGAAAGGGCAU	-16	0.101973	0.504038	down	1	16				24	15	6
hsa-miR-20b-5p	hsa-mir-20b	CAAAGUGCUCAUAGUGCAGGUAG	-4.57576	0.104981	0.504038	down	11	50.3333			30	60	45	43
hsa-miR-361-3p	hsa-mir-361	UCCCCCAGGUGUGAUUCUGAUUU	-4.4186	0.105833	0.504038	down	14.3333	63.3333			40	60	15	112
hsa-miR-148a-3p	hsa-mir-148a	UCAGUGCACUACAGAACUUUGU	2.05046	0.106724	0.504038	up	27415.3	13370.3	39054	21095	22094	17213	16365	6530
hsa-miR-2355-3p	hsa-mir-2355	AUUGUCCUUGCUGUUUGGAGAU	-31	0.109129	0.504038	down	1	31				24	15	51
hsa-miR-26a-5p	hsa-mir-26a-1	UUCAAGUAAUCCAGGAUAGGCU	2.45553	0.112312	0.504038	up	12985.7	5288.33	18928	9273	10753	6893	6875	2094
hsa-miR-26a-5p	hsa-mir-26a-2	UUCAAGUAAUCCAGGAUAGGCU	2.45553	0.112312	0.504038	up	12985.7	5288.33	18928	9273	10753	6893	6875	2094
hsa-miR-92a-3p	hsa-mir-92a-1	UAUUGCACUUGUCCCGGCCUGU	2.05842	0.116076	0.504038	up	1996.67	970	2893	1405	1689	1442	1145	320
hsa-miR-92a-3p	hsa-mir-92a-2	UAUUGCACUUGUCCCGGCCUGU	2.05842	0.116076	0.504038	up	1996.67	970	2893	1405	1689	1442	1145	320
hsa-miR-122-5p	hsa-mir-122	UGGAGUGUGACAAUGGUGUUUG	2.91662	0.116938	0.504038	up	8803.33	3018.33	13402	7036	5969	3409	4301	1342
hsa-miR-novel-chr11_2543	hsa-mir-novel-chr11_2543	CUGACCUAUGAAUUGACAGC	2.85375	0.125765	0.504038	up	520.333	182.333	746	553	259	197	181	166
hsa-miR-103a-3p	hsa-mir-103a-2	AGCAGCAUUGUACAGGGCUAUGA	-2.46448	0.127206	0.504038	down	924.333	2278	848	377	1545	2009	915	3907
hsa-miR-103a-3p	hsa-mir-103a-1	AGCAGCAUUGUACAGGGCUAUGA	-2.46448	0.127206	0.504038	down	924.333	2278	848	377	1545	2009	915	3907
hsa-miR-4508	hsa-mir-4508	GCGGGGCUGGGCGCGCG	-22.6667	0.127261	0.504038	down	1	22.6667				18	38	9
hsa-miR-339-3p	hsa-mir-339	UGAGCGCCUCGACGACAGAGCCG	-62.3333	0.127776	0.504038	down	1	62.3333				24	53	107
hsa-miR-128-3p	hsa-mir-128-1	UCACAGUGAACCGGUCUCUUU	2.41747	0.128509	0.504038	up	922.667	381.667	1311	722	732	441	586	115
hsa-miR-128-3p	hsa-mir-128-2	UCACAGUGAACCGGUCUCUUU	2.41747	0.128509	0.504038	up	922.667	381.667	1311	722	732	441	586	115
hsa-miR-6515-5p	hsa-mir-6515	UUGGAGGGUGUGGAAGACAUC	-46.6667	0.132059	0.504038	down	1	46.6667				60	68	9
hsa-miR-455-5p	hsa-mir-455	UAUGUGCCUUUGGACUACAUCG	3.90152	0.132763	0.504038	up	171.667	44	226	117	169	30	91	8
hsa-miR-4677-3p	hsa-mir-4677	UCUGUGAGACCAAAGAACUACU	-10.6667	0.133072	0.504038	down	1	10.6667				12	15	2
hsa-miR-495-3p	hsa-mir-495	AAACAAACAUGGUGCACUUCUU	-15.6667	0.134756	0.504038	down	1	15.6667				18	23	3
hsa-miR-222-3p	hsa-mir-222	AGCUACAUCUGGCUACUGGGU	-4	0.136843	0.504038	down	11	44			30	60	23	46
hsa-miR-330-3p	hsa-mir-330	GCAAAGCACACGGCCUGCAGAGA	-24	0.137433	0.504038	down	1	24				12	15	42
hsa-miR-27b-3p	hsa-mir-27b	UUCACAGUGGCUAAGUUCUGC	2.10736	0.14034	0.504038	up	2826.67	1341.33	4294	1951	2232	1842	1633	546
hsa-miR-29a-3p	hsa-mir-29a	UAGCACCAUCUGAAAUCGGUUA	1.65489	0.141809	0.504038	up	609	368	723	403	698	352	363	386
hsa-miR-192-5p	hsa-mir-192	CUGACCUAUGAAUUGACAGCC	2.76834	0.144089	0.504038	up	1119.33	404.333	1774	819	762	486	574	150
hsa-miR-3150b-3p	hsa-mir-3150b	UGAGGAGAUCGUCGAGGUUGG	-2.5814	0.145313	0.504038	down	14.3333	37			40	42	15	51
hsa-miR-26b-5p	hsa-mir-26b	UUCAAGUAAUUCAGGAUAGGU	1.80926	0.146686	0.504038	up	872.667	482.333	1017	741	857	656	627	161
hsa-miR-25-5p	hsa-mir-25	AGGCGGAGACUUGGGCAAUUG	-61.3333	0.149954	0.504038	down	1	61.3333				30	38	113
hsa-miR-941	hsa-mir-941-1	CACCCGGCUGUGUGCACAUGUGC	-2.77143	0.152986	0.504038	down	11.6667	32.3333			32	11	12	71
hsa-miR-941	hsa-mir-941-2	CACCCGGCUGUGUGCACAUGUGC	-2.77143	0.152986	0.504038	down	11.6667	32.3333			32	11	12	71
hsa-miR-941	hsa-mir-941-3	CACCCGGCUGUGUGCACAUGUGC	-2.77143	0.152986	0.504038	down	11.6667	32.3333			32	11	12	71
hsa-miR-941	hsa-mir-941-4	CACCCGGCUGUGUGCACAUGUGC	-2.77143	0.152986	0.504038	down	11.6667	32.3333			32	11	12	71
hsa-miR-941	hsa-mir-941-5	CACCCGGCUGUGUGCACAUGUGC	-2.77143	0.152986	0.504038	down	11.6667	32.3333			32	11	12	71
hsa-miR-199a-5p	hsa-mir-199a-1	CCCAGUGUUCAGACUACCUGUUC	-3.24044	0.15538	0.504038	down	61	197.667	45		135	146	53	391
hsa-miR-199a-5p	hsa-mir-199a-2	CCCAGUGUUCAGACUACCUGUUC	-3.24044	0.15538	0.504038	down	61	197.667	45		135	146	53	391
hsa-miR-145-5p	hsa-mir-145	GUCCAGUUUUCCCAGGAAUCCCU	1.6028	0.161152	0.504038	up	114.333	71.3333	158	52	130	83	45	83
hsa-miR-320b	hsa-mir-320b-1	AAAAGCUGGGUUGAGAGGGCAA	-14.3333	0.161188	0.504038	down	1	14.3333				15	23	2
hsa-miR-320b	hsa-mir-320b-2	AAAAGCUGGGUUGAGAGGGCAA	-14.3333	0.161188	0.504038	down	1	14.3333				15	23	2
hsa-miR-novel-chr15_6553	hsa-mir-novel-chr15_6553	GGGGCUGGAGAGAUGGC	3.21951	0.170063	0.504038	up	220	68.3333	384	143	130	95	98	9
hsa-miR-106b-5p	hsa-mir-106b	UAAAGUGCUGACAGUGCAGAU	-2.25	0.172422	0.504038	down	102.667	231	90	26	189	334	60	296
hsa-miR-6842-3p	hsa-mir-6842	UUGGCUGGUCUCUGCUCCGCAG	-37.3333	0.173317	0.504038	down	1	37.3333				15	23	71
hsa-miR-144-3p	hsa-mir-144	UACAGUAUAGAUGAUGUACU	-2.75	0.174589	0.504038	down	50.6667	139.333			149	173	60	182
hsa-miR-629-5p	hsa-mir-629	UGGGUUUACGUUGGGAGAACU	-8.50655	0.176031	0.504038	down	76.3333	649.333	57	59	110	250	469	1226
hsa-miR-25-3p	hsa-mir-25	CAUUGCACUUGUCUCGGUCUGA	1.73287	0.178234	0.504038	up	4190.67	2418.33	5515	2679	4375	3069	2631	1552
hsa-miR-181a-2-3p	hsa-mir-181a-2	ACCACUGACCGUUGACUGUACC	-12.6667	0.183836	0.504038	down	1	12.6667				18		17
hsa-miR-1273h-3p	hsa-mir-1273h	CUGCAGACUCGACCUCCCAGGC	-11.3333	0.183928	0.504038	down	1	11.3333					15	16
hsa-miR-novel-chr3_19732	hsa-mir-novel-chr3_19732	AAAGCAGGAUUCAGACUACA	-11.3333	0.183928	0.504038	down	1	11.3333					15	16
hsa-miR-novel-chr2_17740	hsa-mir-novel-chr2_17740	UACCCUGUAGAACCGAAUUUGU	2.85294	0.184468	0.504038	up	1164	408	1910	722	857	501	627	93
hsa-miR-139-3p	hsa-mir-139	UGGAGACGCGGCCCUGUUGGAGU	-18	0.184912	0.504038	down	1	18				24		27
hsa-miR-novel-chr18_10018	hsa-mir-novel-chr18_10018	AGAGACUGGGGAGAAACC	19.6667	0.185578	0.504038	up	19.6667	1		26	30
hsa-miR-493-3p	hsa-mir-493	UGAAGGUCUACUGUGUGCCAGG	-12	0.186857	0.504038	down	1	12					15	18
hsa-miR-novel-chr22_16369	hsa-mir-novel-chr22_16369	AGCUGCUGGUCUGGAAACUCAGU	-12	0.186857	0.504038	down	1	12				18	15
hsa-miR-20a-5p	hsa-mir-20a	UAAAGUGCUUAUAGUGCAGGUAG	1.77797	0.187688	0.504038	up	3147	1770	4407	1912	3119	2801	1844	662
hsa-miR-4470	hsa-mir-4470	UGGCAAACGUGGAAGCCGAGA	-28	0.188497	0.504038	down	1	28				36	45
hsa-miR-191-5p	hsa-mir-191	CAACGGAAUCCCAAAAGCAGCUG	2.22444	0.19565	0.504038	up	13122	5899	19663	8688	11012	5328	7204	5162
hsa-miR-30a-5p	hsa-mir-30a	UGUAAACAUCCUCGACUGGAAG	2.99659	0.196264	0.504038	up	1466.33	489.333	2622	1066	708	632	718	115
hsa-miR-185-5p	hsa-mir-185	UGGAGAGAAAGGCAGUUCCUGA	-2.53544	0.198239	0.504038	down	1603.67	4066	1695	1548	1565	2843	2729	6623
hsa-miR-766-3p	hsa-mir-766	ACUCCAGCCCCACAGCCUCAGC	-21	0.199359	0.504038	down	1	21				24		36
hsa-miR-7974	hsa-mir-7974	AGGCUGUGAUGCUCUCCUGAGCCC	-7.66667	0.199359	0.504038	down	1	7.66667				12		8
hsa-miR-425-3p	hsa-mir-425	AUCGGGAAUGUCGUGUCCGCCC	-20.6667	0.20263	0.504038	down	1	20.6667				36		23
hsa-miR-197-3p	hsa-mir-197	UUCACCACCUUCUCCACCCAGC	-68.6667	0.206298	0.504038	down	1	68.6667				77		126
hsa-miR-23b-3p	hsa-mir-23b	AUCACAUUGCCAGGGAUUACCAC	-17	0.207882	0.504038	down	1	17				18		30
hsa-miR-152-3p	hsa-mir-152	UCAGUGCAUGACAGAACUUGG	2.11931	0.208134	0.504038	up	651.333	307.333	949	494	508	238	401	280
hsa-miR-483-5p	hsa-mir-483	AAGACGGGAGGAAAGAAGGGAG	97.3333	0.209726	0.504038	up	292	3	271	572	30			6
hsa-miR-181c-5p	hsa-mir-181c	AACAUUCAACCUGUCGGUGAGU	5.42857	0.215881	0.504038	up	12.6667	2.33333		20	15			4
hsa-miR-4286	hsa-mir-4286	ACCCCACUCCUGGUACC	-12.6667	0.221067	0.504038	down	1	12.6667				12		23
hsa-miR-30c-5p	hsa-mir-30c-2	UGUAAACAUCCUACACUCUCAGC	2.38259	0.221193	0.504038	up	602	252.667	1006	403	394	301	386	68
hsa-miR-30c-5p	hsa-mir-30c-1	UGUAAACAUCCUACACUCUCAGC	2.38259	0.221193	0.504038	up	602	252.667	1006	403	394	301	386	68
hsa-miR-203a-3p	hsa-mir-203a	GUGAAAUGUUUAGGACCACUAG	2.65789	0.223641	0.504038	up	33.6667	12.6667	57	26	15	12	19	4
hsa-miR-423-5p	hsa-mir-423	UGAGGGGCAGAGAGCGAGACUUU	-1.57034	0.224444	0.504038	down	917	1440	927	715	1106	1073	1020	2224
hsa-miR-17-5p	hsa-mir-17	CAAAGUGCUUACAGUGCAGGUAG	2.08796	0.224737	0.504038	up	2081	996.667	3277	1040	1923	1258	1141	588
hsa-miR-1185-1-3p	hsa-mir-1185-1	AUAUACAGGGGGAGACUCUUAU	-7	0.225403	0.504038	down	1	7				12		6
hsa-miR-4430	hsa-mir-4430	AGGCUGGAGUGAGCGGAG	-16	0.225403	0.504038	down	1	16				30	15
hsa-miR-novel-chr2_17350	hsa-mir-novel-chr2_17350	AUCCUAGCUUGCCUGAGACUG	-12	0.225403	0.504038	down	1	12					11	22
hsa-miR-novel-chrX_28480	hsa-mir-novel-chrX_28480	AUCCUAGCUUGCCUGAGACUG	-12	0.225403	0.504038	down	1	12					11	22
hsa-miR-223-3p	hsa-mir-223	UGUCAGUUUGUCAAAUACCCCA	-2.17367	0.234173	0.504038	down	1111.33	2415.67	452	507	2372	3290	1232	2722
hsa-miR-1246	hsa-mir-1246	AAUGGAUUUUUGGAGCAGG	-7.6087	0.235418	0.504038	down	7.66667	58.3333			20	18	23	131
hsa-miR-11400	hsa-mir-11400	UCGGCUGUGUAUCUCUGUGUC	-21.3333	0.236006	0.504038	down	1	21.3333				42		19
hsa-miR-140-5p	hsa-mir-140	CAGUGGUUUUACCCUAUGGUAG	1.94627	0.237761	0.504038	up	809	415.667	994	533	897	370	612	262
hsa-miR-3617-5p	hsa-mir-3617	AAAGACAUAGUUGCAAGAUGGG	-6.66667	0.245003	0.504038	down	1	6.66667				12		5
hsa-miR-28-3p	hsa-mir-28	CACUAGAUUGUGAGCUCCUGGA	-3.88435	0.248992	0.504038	down	147	571	113	26	299	286	174	1250
hsa-miR-novel-chr3_19235	hsa-mir-novel-chr3_19235	AACUGUGGAGUGAGAAG	-9.33333	0.252648	0.504038	down	1	9.33333				18		7
hsa-miR-9-5p	hsa-mir-9-1	UCUUUGGUUAUCUAGCUGUAUGA	-7	0.253876	0.504038	down	1	7					13	5
hsa-miR-9-5p	hsa-mir-9-2	UCUUUGGUUAUCUAGCUGUAUGA	-7	0.253876	0.504038	down	1	7					13	5
hsa-miR-9-5p	hsa-mir-9-3	UCUUUGGUUAUCUAGCUGUAUGA	-7	0.253876	0.504038	down	1	7					13	5
hsa-miR-novel-chr20_14682	hsa-mir-novel-chr20_14682	UUGUGAAUGGGGGAACAUAG	-12	0.256689	0.504038	down	1	12				24		9
hsa-miR-183-5p	hsa-mir-183	UAUGGCACUGGUAGAAUUCACU	-3.5814	0.258068	0.504038	down	14.3333	51.3333			40	30		121
hsa-miR-423-3p	hsa-mir-423	AGCUCGGUCUGAGGCCCCUCAGU	-1.13858	0.264004	0.504038	down	635	723	633	611	658	727	597	842
hsa-miR-7-5p	hsa-mir-7-1	UGGAAGACUAGUGAUUUUGUUGUU	-2.26291	0.268241	0.504038	down	71	160.667	53	61	96	124	59	296
hsa-miR-7-5p	hsa-mir-7-2	UGGAAGACUAGUGAUUUUGUUGUU	-2.26291	0.268241	0.504038	down	71	160.667	53	61	96	124	59	296
hsa-miR-7-5p	hsa-mir-7-3	UGGAAGACUAGUGAUUUUGUUGUU	-2.26291	0.268241	0.504038	down	71	160.667	53	61	96	124	59	296
hsa-miR-181d-5p	hsa-mir-181d	AACAUUCAUUGUUGUCGGUGGGU	5.3	0.274489	0.504038	up	88.3333	16.6667	181	26	55	18	26	3
hsa-miR-574-5p	hsa-mir-574	UGAGUGUGUGUGUGUGAGUGUGU	-8.3913	0.281914	0.504038	down	7.66667	64.3333			20	131		59
hsa-miR-6852-5p	hsa-mir-6852	CCCUGGGGUUCUGAGGACAUG	-18.6667	0.283718	0.504038	down	1	18.6667				12		41
hsa-miR-551a	hsa-mir-551a	GCGACCCACUCUUGGUUUCCA	-11.3333	0.284086	0.504038	down	1	11.3333				24		7
hsa-miR-193b-3p	hsa-mir-193b	AACUGGCCCUCAAAGUCCCGCU	6.8	0.285094	0.504038	up	22.6667	3.33333	45		20			7
hsa-miR-novel-chr6_23941	hsa-mir-novel-chr6_23941	GCUGGAGGGAGGCUGGGCG	45.6667	0.285249	0.504038	up	45.6667	1		104	30
hsa-miR-30d-5p	hsa-mir-30d	UGUAAACAUCCCCGACUGGAAG	1.74544	0.285805	0.504038	up	2294.67	1314.67	3571	1496	1814	1252	1383	1306
hsa-miR-novel-chr14_5271	hsa-mir-novel-chr14_5271	GAAGCUCAGAGGGCUCUGAUUC	-6.26087	0.288518	0.504038	down	7.66667	48			20	69	68	4
hsa-miR-376c-3p	hsa-mir-376c	AACAUAGAGGAAAUUCCACGU	-8.66667	0.289188	0.504038	down	1	8.66667				18		5
hsa-miR-5187-5p	hsa-mir-5187	UGGGAUGAGGGAUUGAAGUGGA	-8.66667	0.289188	0.504038	down	1	8.66667				18		5
hsa-miR-671-5p	hsa-mir-671	AGGAAGCCCUGGAGGGGCUGGAG	3.21739	0.29656	0.504038	up	98.6667	30.6667	57	221	15	24	57	8
hsa-miR-532-5p	hsa-mir-532	CAUGCCUUGAGUGUAGGACCGU	-6.84191	0.297342	0.504038	down	90.6667	620.333	90	39	140	226	204	1428
hsa-miR-425-5p	hsa-mir-425	AAUGACACGAUCACUCCCGUUGA	-1.1567	0.299178	0.504038	down	117	135.333	68	91	189	101	121	181
hsa-miR-136-3p	hsa-mir-136	CAUCAUCGUCUCAAAUGAGUCU	-6	0.29986	0.504038	down	1	6				12		3
hsa-miR-29b-3p	hsa-mir-29b-1	UAGCACCAUUUGAAAUCAGUGUU	-16	0.29986	0.504038	down	1	16				36		9
hsa-miR-29b-3p	hsa-mir-29b-2	UAGCACCAUUUGAAAUCAGUGUU	-16	0.29986	0.504038	down	1	16				36		9
hsa-miR-326	hsa-mir-326	CCUCUGGGCCCUUCCUCCAG	-2.82759	0.310408	0.504038	down	9.66667	27.3333		26		42	23	14
hsa-miR-320c	hsa-mir-320c-1	AAAAGCUGGGUUGAGAGGGU	-4.66667	0.311153	0.504038	down	1	4.66667				9		2
hsa-miR-320c	hsa-mir-320c-2	AAAAGCUGGGUUGAGAGGGU	-4.66667	0.311153	0.504038	down	1	4.66667				9		2
hsa-miR-novel-chr19_11567	hsa-mir-novel-chr19_11567	UGAGGAGGAUCUGAAGGAUUGG	-20.3333	0.317032	0.504038	down	1	20.3333				48		10
hsa-miR-22-5p	hsa-mir-22	AGUUCUUCAGUGGCAAGCUUUA	3.54902	0.318634	0.504038	up	60.3333	17	113	65		12	23	13
hsa-miR-1288-3p	hsa-mir-1288	UGGACUGCCCUGAUCUGGAGA	-7	0.320634	0.504038	down	1	7					15	3
hsa-miR-452-5p	hsa-mir-452	AACUGUUUGCAGAGGAAACUGA	-7	0.320634	0.504038	down	1	7					15	3
hsa-miR-142-5p	hsa-mir-142	CAUAAAGUAGAAAGCACUACU	-1.71046	0.32432	0.504038	down	124.333	212.667	90	91	189	310	83	242
hsa-miR-novel-chr7_25414	hsa-mir-novel-chr7_25414	AGGAAGCCCUGGAGGGGCUGGAGG	6.27273	0.325036	0.504038	up	414	66	136	988	115	57	102	36
hsa-miR-23a-5p	hsa-mir-23a	GGGGUUCCUGGGGAUGGGAUUU	-2.21739	0.335589	0.504038	down	7.66667	17			20	24		24
hsa-miR-320d	hsa-mir-320d-1	AAAAGCUGGGUUGAGAGGA	-8.33333	0.33967	0.504038	down	1	8.33333					19	3
hsa-miR-320d	hsa-mir-320d-2	AAAAGCUGGGUUGAGAGGA	-8.33333	0.33967	0.504038	down	1	8.33333					19	3
hsa-miR-novel-chr7_25563	hsa-mir-novel-chr7_25563	AGGGCUGUGGGGCAGGGA	-15.6667	0.33967	0.504038	down	1	15.6667					38	6
hsa-miR-502-3p	hsa-mir-502	AAUGCACCUGGGCAAGGAUUCA	-4.97674	0.340839	0.504038	down	14.3333	71.3333			40		23	188
hsa-miR-576-3p	hsa-mir-576	AAGAUGUGGAAAAAUUGGAAUC	-17.2174	0.353846	0.504038	down	7.66667	132			20	18	23	352
hsa-miR-151a-3p	hsa-mir-151a	CUAGACUGAAGCUCCUUGAGG	-1.33635	0.353945	0.504038	down	332	443.667	407	202	384	697	272	359
hsa-miR-144-5p	hsa-mir-144	GGAUAUCAUCAUAUACUGUAAG	-10	0.355497	0.504038	down	1	10				24		3
hsa-miR-10b-5p	hsa-mir-10b	UACCCUGUAGAACCGAAUUUGUG	4.875	0.357642	0.504038	up	39	8	79		35		11	10
hsa-miR-378g	hsa-mir-378g	ACUGGGCUUGGAGUCAGAAG	-7.66667	0.362423	0.504038	down	1	7.66667				18		2
hsa-miR-1307-5p	hsa-mir-1307	UCGACCGGACCUCGACCGGCU	-4.03175	0.366001	0.504038	down	21	84.6667			60	18		233
hsa-miR-novel-chr18_10094	hsa-mir-novel-chr18_10094	AAGUUCCGGAAGGGAGGCUG	-9.33333	0.374805	0.504038	down	1	9.33333					23	2
hsa-miR-126-5p	hsa-mir-126	CAUUAUUACUUUUGGUACGCG	1.82947	0.378422	0.504038	up	579.333	316.667	588	390	757	644	265	38
hsa-miR-125b-5p	hsa-mir-125b-1	UCCCUGAGACCCUAACUUGUGA	4.47368	0.379399	0.504038	up	28.3333	6.33333	57		25		11	5
hsa-miR-125b-5p	hsa-mir-125b-2	UCCCUGAGACCCUAACUUGUGA	4.47368	0.379399	0.504038	up	28.3333	6.33333	57		25		11	5
hsa-miR-939-5p	hsa-mir-939	UGGGGAGCUGAGGCUCUGGGGGUG	2.65385	0.381087	0.504038	up	23	8.66667		26	40		23
hsa-miR-221-3p	hsa-mir-221	AGCUACAUUGUCUGCUGGGUUUC	1.09524	0.382787	0.504038	up	138	126	170	72	169	152	45	178
hsa-miR-27a-5p	hsa-mir-27a	AGGGCUUAGCUGCUUGUGAGCA	-186.667	0.384224	0.504038	down	1	186.667				36		521
hsa-miR-133a-3p	hsa-mir-133a-1	UUUGGUCCCCUUCAACCAGCUG	2.36111	0.386011	0.504038	up	28.3333	12	45		37	18	13	2
hsa-miR-133a-3p	hsa-mir-133a-2	UUUGGUCCCCUUCAACCAGCUG	2.36111	0.386011	0.504038	up	28.3333	12	45		37	18	13	2
hsa-miR-194-5p	hsa-mir-194-1	UGUAACAGCAACUCCAUGUGGA	-2.83333	0.386676	0.504038	down	6	17			15	15	26	7
hsa-miR-194-5p	hsa-mir-194-2	UGUAACAGCAACUCCAUGUGGA	-2.83333	0.386676	0.504038	down	6	17			15	15	26	7
hsa-miR-486-5p	hsa-mir-486-1	UCCUGUACUGAGCUGCCCCGAG	1.40089	0.389713	0.504038	up	1677.33	1197.33	2268	1379	1382	1176	1754	659
hsa-miR-486-5p	hsa-mir-486-2	UCCUGUACUGAGCUGCCCCGAG	1.40089	0.389713	0.504038	up	1677.33	1197.33	2268	1379	1382	1176	1754	659
hsa-miR-150-5p	hsa-mir-150	UCUCCCAACCCUUGUACCAGUG	-1.58106	0.392108	0.504038	down	440	695.667	565	234	518	411	491	1182
hsa-miR-4665-5p	hsa-mir-4665	CUGGGGGACGCGUGAGCGCGAGC	-15.6667	0.395841	0.504038	down	1	15.6667				42		2
hsa-miR-769-5p	hsa-mir-769	UGAGACCUCUGGGUUCUGAGCU	-7.72581	0.397289	0.504038	down	20.6667	159.667	34		25	33	19	424
hsa-miR-148a-5p	hsa-mir-148a	AAAGUUCUGAGACACUCCGACU	-10.4559	0.399625	0.504038	down	22.6667	237	45		20		76	632
hsa-miR-99a-5p	hsa-mir-99a	AACCCGUAGAUCCGAUCUUGUG	2.91038	0.402965	0.504038	up	205.667	70.6667	339	195	80	18		191
hsa-miR-146a-5p	hsa-mir-146a	UGAGAACUGAAUUCCAUGGGUU	-1.57805	0.405565	0.504038	down	1986	3134	2418	1105	2432	2146	1512	5741
hsa-miR-novel-chr7_25390	hsa-mir-novel-chr7_25390	AGUUGGUCCGAGUGUUGUGG	-12.8593	0.408833	0.504038	down	490.333	6305.33	339	481	648	370	862	17681
hsa-miR-375-3p	hsa-mir-375	UUUGUUCGUUCGGCUCGCGUGA	2.06522	0.412341	0.504038	up	63.3333	30.6667	68	39	80	18	68	3
hsa-miR-novel-chr3_19892	hsa-mir-novel-chr3_19892	GGGGCCGAGGGAGCGAG	21.8182	0.41518	0.504038	up	240	11	678	39			23	7
hsa-miR-210-3p	hsa-mir-210	CUGUGCGUGUGACAGCGGCUGA	-2.09797	0.415965	0.504038	down	98.6667	207	90	39	164	361	185	72
hsa-miR-novel-chr16_7839	hsa-mir-novel-chr16_7839	GCAGGACGGUGGCCAUG	-8.25686	0.416867	0.504038	down	170	1403.67	45	143	319	36	189	3983
hsa-miR-146b-5p	hsa-mir-146b	UGAGAACUGAAUUCCAUAGGCUG	-10.2736	0.419071	0.504038	down	800.333	8222.33	927	494	977	715	847	23102
hsa-let-7g-3p	hsa-let-7g	CUGUACAGGCCACUGCCUUGC	-3	0.42265	0.504038	down	1	3						6
hsa-miR-10392-5p	hsa-mir-10392	GCGCUUCGACGGGCUGGGCUGUG	-2	0.42265	0.504038	down	1	2						3
hsa-miR-10395-3p	hsa-mir-10395	AUGUAUUCGUACUGUCUGAUG	-14.3333	0.42265	0.504038	down	1	14.3333						40
hsa-miR-10399-5p	hsa-mir-10399	AAUUACAGAUUGUCUCAGAGA	-10.3333	0.42265	0.504038	down	1	10.3333						28
hsa-miR-103a-2-5p	hsa-mir-103a-2	AGCUUCUUUACAGUGCUGCCUUG	-4.33333	0.42265	0.504038	down	1	4.33333						10
hsa-miR-10527-5p	hsa-mir-10527	AAAGCAAAUGUUGGGUGAACGGC	-4.33333	0.42265	0.504038	down	1	4.33333						10
hsa-miR-106a-5p	hsa-mir-106a	AAAAGUGCUUACAGUGCAGGUAG	-6	0.42265	0.504038	down	1	6						15
hsa-miR-1180-3p	hsa-mir-1180	UUUCCGGCUCGCGUGGGUGUGU	-4	0.42265	0.504038	down	1	4						9
hsa-miR-1224-5p	hsa-mir-1224	GUGAGGACUCGGGAGGUGG	-6	0.42265	0.504038	down	1	6					15
hsa-miR-1249-3p	hsa-mir-1249	ACGCCCUUCCCCCCCUUCUUCA	-1.66667	0.42265	0.504038	down	1	1.66667						2
hsa-miR-1250-5p	hsa-mir-1250	ACGGUGCUGGAUGUGGCCUUU	-33.3333	0.42265	0.504038	down	1	33.3333						97
hsa-miR-1255a	hsa-mir-1255a	AGGAUGAGCAAAGAAAGUAGAUU	-2.66667	0.42265	0.504038	down	1	2.66667						5
hsa-miR-125a-5p	hsa-mir-125a	UCCCUGAGACCCUUUAACCUGUGA	-1.66667	0.42265	0.504038	down	1	1.66667						2
hsa-miR-1260b	hsa-mir-1260b	AUCCCACCACUGCCACCAU	-1.66667	0.42265	0.504038	down	1	1.66667						2
hsa-miR-1273h-5p	hsa-mir-1273h	CUGGGAGGUCAAGGCUGCAGU	-3.66667	0.42265	0.504038	down	1	3.66667						8
hsa-miR-1275	hsa-mir-1275	GUGGGGGAGAGGCUGUC	-7	0.42265	0.504038	down	1	7				18
hsa-miR-1277-3p	hsa-mir-1277	UACGUAGAUAUAUAUGUAUUUU	-7	0.42265	0.504038	down	1	7				18
hsa-miR-1285-3p	hsa-mir-1285-1	UCUGGGCAACAAAGUGAGACCU	-6	0.42265	0.504038	down	1	6						15
hsa-miR-1285-3p	hsa-mir-1285-2	UCUGGGCAACAAAGUGAGACCU	-6	0.42265	0.504038	down	1	6						15
hsa-miR-1287-5p	hsa-mir-1287	UGCUGGAUCAGUGGUUCGAGUC	-2.66667	0.42265	0.504038	down	1	2.66667						5
hsa-miR-129-5p	hsa-mir-129-1	CUUUUUGCGGUCUGGGCUUGC	-1.66667	0.42265	0.504038	down	1	1.66667						2
hsa-miR-129-5p	hsa-mir-129-2	CUUUUUGCGGUCUGGGCUUGC	-1.66667	0.42265	0.504038	down	1	1.66667						2
hsa-miR-1291	hsa-mir-1291	UGGCCCUGACUGAAGACCAGCAGU	-2	0.42265	0.504038	down	1	2						3
hsa-miR-1294	hsa-mir-1294	UGUGAGGUUGGCAUUGUUGUCU	-2	0.42265	0.504038	down	1	2						3
hsa-miR-1301-3p	hsa-mir-1301	UUGCAGCUGCCUGGGAGUGACUUC	-3.66667	0.42265	0.504038	down	1	3.66667						8
hsa-miR-1304-5p	hsa-mir-1304	UUUGAGGCUACAGUGAGAUGUG	-3.33333	0.42265	0.504038	down	1	3.33333						7
hsa-miR-1306-3p	hsa-mir-1306	ACGUUGGCUCUGGUGGUG	-1.66667	0.42265	0.504038	down	1	1.66667						2
hsa-miR-130a-5p	hsa-mir-130a	GCUCUUUUCACAUUGUGCUACU	-3	0.42265	0.504038	down	1	3						6
hsa-miR-130b-5p	hsa-mir-130b	ACUCUUUCCCUGUUGCACUAC	-1.66667	0.42265	0.504038	down	1	1.66667						2
hsa-miR-1322	hsa-mir-1322	GAUGAUGCUGCUGAUGCUG	-1.66667	0.42265	0.504038	down	1	1.66667						2
hsa-miR-146b-3p	hsa-mir-146b	GCCCUGUGGACUCAGUUCUGGU	-124	0.42265	0.504038	down	1	124						369
hsa-miR-155-5p	hsa-mir-155	UUAAUGCUAAUCGUGAUAGGGGUU	-9	0.42265	0.504038	down	1	9						24
hsa-miR-16-1-3p	hsa-mir-16-1	CCAGUAUUAACUGUGCUGCUGA	-4	0.42265	0.504038	down	1	4						9
hsa-miR-181c-3p	hsa-mir-181c	AACCAUCGACCGUUGAGUGGAC	-4	0.42265	0.504038	down	1	4				9
hsa-miR-18a-3p	hsa-mir-18a	ACUGCCCUAAGUGCUCCUUCUGG	-3.66667	0.42265	0.504038	down	1	3.66667						8
hsa-miR-1908-5p	hsa-mir-1908	CGGCGGGGACGGCGAUUGGUC	-1.66667	0.42265	0.504038	down	1	1.66667						2
hsa-miR-193a-3p	hsa-mir-193a	AACUGGCCUACAAAGUCCCAGU	-5.66667	0.42265	0.504038	down	1	5.66667						14
hsa-miR-195-3p	hsa-mir-195	CCAAUAUUGGCUGUGCUGCUCC	-7	0.42265	0.504038	down	1	7				18
hsa-miR-1976	hsa-mir-1976	CCUCCUGCCCUCCUUGCUGU	-1.66667	0.42265	0.504038	down	1	1.66667						2
hsa-miR-2115-3p	hsa-mir-2115	CAUCAGAAUUCAUGGAGGCUAG	-4.66667	0.42265	0.504038	down	1	4.66667						11
hsa-miR-2115-5p	hsa-mir-2115	AGCUUCCAUGACUCCUGAUGGA	-5	0.42265	0.504038	down	1	5						12
hsa-miR-214-5p	hsa-mir-214	UGCCUGUCUACACUUGCUGUGC	-2	0.42265	0.504038	down	1	2						3
hsa-miR-218-5p	hsa-mir-218-1	UUGUGCUUGAUCUAACCAUGU	-2.33333	0.42265	0.504038	down	1	2.33333						4
hsa-miR-218-5p	hsa-mir-218-2	UUGUGCUUGAUCUAACCAUGU	-2.33333	0.42265	0.504038	down	1	2.33333						4
hsa-miR-219a-1-3p	hsa-mir-219a-1	AGAGUUGAGUCUGGACGUCCCG	-1.66667	0.42265	0.504038	down	1	1.66667						2
hsa-miR-219b-3p	hsa-mir-219b	AGAAUUGCGUUUGGACAAUCAGU	-1.66667	0.42265	0.504038	down	1	1.66667						2
hsa-miR-221-5p	hsa-mir-221	ACCUGGCAUACAAUGUAGAUUU	-4	0.42265	0.504038	down	1	4				9
hsa-miR-2355-5p	hsa-mir-2355	AUCCCCAGAUACAAUGGACAA	-3	0.42265	0.504038	down	1	3						6
hsa-miR-27b-5p	hsa-mir-27b	AGAGCUUAGCUGAUUGGUGAAC	-6.33333	0.42265	0.504038	down	1	6.33333						16
hsa-miR-296-3p	hsa-mir-296	GAGGGUUGGGUGGAGGCUCUCC	-6	0.42265	0.504038	down	1	6					15
hsa-miR-29b-2-5p	hsa-mir-29b-2	CUGGUUUCACAUGGUGGCUUAG	-2	0.42265	0.504038	down	1	2						3
hsa-miR-29c-5p	hsa-mir-29c	UGACCGAUUUCUCCUGGUGUUC	-3.33333	0.42265	0.504038	down	1	3.33333						7
hsa-miR-3124-5p	hsa-mir-3124	UUCGCGGGCGAAGGCAAAGUC	-1.66667	0.42265	0.504038	down	1	1.66667						2
hsa-miR-3127-5p	hsa-mir-3127	AUCAGGGCUUGUGGAAUGGGAAG	-1.66667	0.42265	0.504038	down	1	1.66667						2
hsa-miR-3146	hsa-mir-3146	CAUGCUAGGAUAGAAAGAAUGG	-1.66667	0.42265	0.504038	down	1	1.66667						2
hsa-miR-3158-3p	hsa-mir-3158-1	AAGGGCUUCCUCUCUGCAGGAC	-2	0.42265	0.504038	down	1	2						3
hsa-miR-3158-3p	hsa-mir-3158-2	AAGGGCUUCCUCUCUGCAGGAC	-2	0.42265	0.504038	down	1	2						3
hsa-miR-3164	hsa-mir-3164	UGUGACUUUAAGGGAAAUGGCG	-2	0.42265	0.504038	down	1	2						3
hsa-miR-3165	hsa-mir-3165	AGGUGGAUGCAAUGUGACCUCA	-1.66667	0.42265	0.504038	down	1	1.66667						2
hsa-miR-3173-5p	hsa-mir-3173	UGCCCUGCCUGUUUUCUCCUUU	-1.66667	0.42265	0.504038	down	1	1.66667						2
hsa-miR-3176	hsa-mir-3176	ACUGGCCUGGGACUACCGG	-2.66667	0.42265	0.504038	down	1	2.66667						5
hsa-miR-3177-3p	hsa-mir-3177	UGCACGGCACUGGGGACACGU	-7	0.42265	0.504038	down	1	7						18
hsa-miR-3192-5p	hsa-mir-3192	UCUGGGAGGUUGUAGCAGUGGAA	-1.66667	0.42265	0.504038	down	1	1.66667						2
hsa-miR-324-5p	hsa-mir-324	CGCAUCCCCUAGGGCAUUGGUG	-67	0.42265	0.504038	down	1	67						198
hsa-miR-331-3p	hsa-mir-331	GCCCCUGGGCCUAUCCUAGAA	-3	0.42265	0.504038	down	1	3						6
hsa-miR-335-3p	hsa-mir-335	UUUUUCAUUAUUGCUCCUGACC	-5	0.42265	0.504038	down	1	5				12
hsa-miR-338-3p	hsa-mir-338	UCCAGCAUCAGUGAUUUUGUUG	-2.66667	0.42265	0.504038	down	1	2.66667						5
hsa-miR-338-5p	hsa-mir-338	AACAAUAUCCUGGUGCUGAGUG	-1.66667	0.42265	0.504038	down	1	1.66667						2
hsa-miR-342-5p	hsa-mir-342	AGGGGUGCUAUCUGUGAUUGA	-8.66667	0.42265	0.504038	down	1	8.66667						23
hsa-miR-345-5p	hsa-mir-345	GCUGACUCCUAGUCCAGGGCUC	-13.6667	0.42265	0.504038	down	1	13.6667						38
hsa-miR-34a-5p	hsa-mir-34a	UGGCAGUGUCUUAGCUGGUUGU	-3	0.42265	0.504038	down	1	3						6
hsa-miR-34c-5p	hsa-mir-34c	AGGCAGUGUAGUUAGCUGAUUGC	-4.66667	0.42265	0.504038	down	1	4.66667						11
hsa-miR-3611	hsa-mir-3611	UUGUGAAGAAAGAAAUUCUUA	-1.66667	0.42265	0.504038	down	1	1.66667						2
hsa-miR-3615	hsa-mir-3615	UCUCUCGGCUCCUCGCGGCUC	-3.33333	0.42265	0.504038	down	1	3.33333						7
hsa-miR-3617-3p	hsa-mir-3617	CAUCAGCACCCUAUGUCCUUUCU	-2	0.42265	0.504038	down	1	2						3
hsa-miR-362-3p	hsa-mir-362	AACACACCUAUUCAAGGAUUCA	-3.66667	0.42265	0.504038	down	1	3.66667						8
hsa-miR-362-5p	hsa-mir-362	AAUCCUUGGAACCUAGGUGUGAGU	-4	0.42265	0.504038	down	1	4						9
hsa-miR-3661	hsa-mir-3661	UGACCUGGGACUCGGACAGCUG	-7	0.42265	0.504038	down	1	7				18
hsa-miR-369-5p	hsa-mir-369	AGAUCGACCGUGUUAUAUUCGC	-1.66667	0.42265	0.504038	down	1	1.66667						2
hsa-miR-3690	hsa-mir-3690-1	ACCUGGACCCAGCGUAGACAAAG	-1.66667	0.42265	0.504038	down	1	1.66667						2
hsa-miR-3690	hsa-mir-3690-2	ACCUGGACCCAGCGUAGACAAAG	-1.66667	0.42265	0.504038	down	1	1.66667						2
hsa-miR-378e	hsa-mir-378e	ACUGGACUUGGAGUCAGGA	-2	0.42265	0.504038	down	1	2						3
hsa-miR-3918	hsa-mir-3918	ACAGGGCCGCAGAUGGAGACU	-3.33333	0.42265	0.504038	down	1	3.33333						7
hsa-miR-3928-3p	hsa-mir-3928	GGAGGAACCUUGGAGCUUCGGC	-4	0.42265	0.504038	down	1	4						9
hsa-miR-3934-5p	hsa-mir-3934	UCAGGUGUGGAAACUGAGGCAG	-2.33333	0.42265	0.504038	down	1	2.33333						4
hsa-miR-421	hsa-mir-421	AUCAACAGACAUUAAUUGGGCGC	-1.66667	0.42265	0.504038	down	1	1.66667						2
hsa-miR-424-3p	hsa-mir-424	CAAAACGUGAGGCGCUGCUAU	-2	0.42265	0.504038	down	1	2						3
hsa-miR-432-5p	hsa-mir-432	UCUUGGAGUAGGUCAUUGGGUGG	-2.66667	0.42265	0.504038	down	1	2.66667						5
hsa-miR-4443	hsa-mir-4443	UUGGAGGCGUGGGUUUU	-1.66667	0.42265	0.504038	down	1	1.66667						2
hsa-miR-4446-3p	hsa-mir-4446	CAGGGCUGGCAGUGACAUGGGU	-3	0.42265	0.504038	down	1	3						6
hsa-miR-4477b	hsa-mir-4477b	AUUAAGGACAUUUGUGAUUGAU	-2.66667	0.42265	0.504038	down	1	2.66667						5
hsa-miR-4489	hsa-mir-4489	UGGGGCUAGUGAUGCAGGACG	-4	0.42265	0.504038	down	1	4						9
hsa-miR-4504	hsa-mir-4504	UGUGACAAUAGAGAUGAACAUG	-7	0.42265	0.504038	down	1	7						18
hsa-miR-4505	hsa-mir-4505	AGGCUGGGCUGGGACGGA	-2	0.42265	0.504038	down	1	2						3
hsa-miR-4645-3p	hsa-mir-4645	AGACAGUAGUUCUUGCCUGGUU	-2	0.42265	0.504038	down	1	2						3
hsa-miR-4646-5p	hsa-mir-4646	ACUGGGAAGAGGAGCUGAGGGA	-5	0.42265	0.504038	down	1	5				12
hsa-miR-4654	hsa-mir-4654	UGUGGGAUCUGGAGGCAUCUGG	-1.66667	0.42265	0.504038	down	1	1.66667						2
hsa-miR-4664-3p	hsa-mir-4664	CUUCCGGUCUGUGAGCCCCGUC	-2.66667	0.42265	0.504038	down	1	2.66667						5
hsa-miR-4669	hsa-mir-4669	UGUGUCCGGGAAGUGGAGGAGG	-2	0.42265	0.504038	down	1	2						3
hsa-miR-4676-5p	hsa-mir-4676	GAGCCAGUGGUGAGACAGUGA	-3	0.42265	0.504038	down	1	3						6
hsa-miR-4700-5p	hsa-mir-4700	UCUGGGGAUGAGGACAGUGUGU	-2	0.42265	0.504038	down	1	2						3
hsa-miR-4741	hsa-mir-4741	CGGGCUGUCCGGAGGGGUCGGCU	-7	0.42265	0.504038	down	1	7				18
hsa-miR-4746-5p	hsa-mir-4746	CCGGUCCCAGGAGAACCUGCAGA	-1.66667	0.42265	0.504038	down	1	1.66667						2
hsa-miR-4750-5p	hsa-mir-4750	CUCGGGCGGAGGUGGUUGAGUG	-11	0.42265	0.504038	down	1	11					30
hsa-miR-4772-3p	hsa-mir-4772	CCUGCAACUUUGCCUGAUCAGA	-5.33333	0.42265	0.504038	down	1	5.33333						13
hsa-miR-4772-5p	hsa-mir-4772	UGAUCAGGCAAAAUUGCAGACU	-29.3333	0.42265	0.504038	down	1	29.3333						85
hsa-miR-4791	hsa-mir-4791	UGGAUAUGAUGACUGAAA	-2.66667	0.42265	0.504038	down	1	2.66667						5
hsa-miR-486-3p	hsa-mir-486-1	CGGGGCAGCUCAGUACAGGAU	-2	0.42265	0.504038	down	1	2						3
hsa-miR-486-3p	hsa-mir-486-2	CGGGGCAGCUCAGUACAGGAU	-2	0.42265	0.504038	down	1	2						3
hsa-miR-491-5p	hsa-mir-491	AGUGGGGAACCCUUCCAUGAGG	-3.66667	0.42265	0.504038	down	1	3.66667						8
hsa-miR-503-5p	hsa-mir-503	UAGCAGCGGGAACAGUUCUGCAG	-2.66667	0.42265	0.504038	down	1	2.66667						5
hsa-miR-505-3p	hsa-mir-505	CGUCAACACUUGCUGGUUUCCU	-4	0.42265	0.504038	down	1	4						9
hsa-miR-511-3p	hsa-mir-511	AAUGUGUAGCAAAAGACAGA	-1.66667	0.42265	0.504038	down	1	1.66667						2
hsa-miR-511-5p	hsa-mir-511	GUGUCUUUUGCUCUGCAGUCA	-3.66667	0.42265	0.504038	down	1	3.66667						8
hsa-miR-539-3p	hsa-mir-539	AUCAUACAAGGACAAUUUCUUU	-1.66667	0.42265	0.504038	down	1	1.66667						2
hsa-miR-542-5p	hsa-mir-542	UCGGGGAUCAUCAUGUCACGAGA	-2	0.42265	0.504038	down	1	2						3
hsa-miR-548ah-3p	hsa-mir-548ah	CAAAAACUGCAGUUACUUUUGC	-1.66667	0.42265	0.504038	down	1	1.66667						2
hsa-miR-548an	hsa-mir-548an	AAAAGGCAUUGUGGUUUUUG	-3.33333	0.42265	0.504038	down	1	3.33333						7
hsa-miR-548ar-3p	hsa-mir-548ar	UAAAACUGCAGUUAUUUUUGC	-1.66667	0.42265	0.504038	down	1	1.66667						2
hsa-miR-548bc	hsa-mir-548bc	AAAAACUGUGAUUACUUUUGC	-4.66667	0.42265	0.504038	down	1	4.66667						11
hsa-miR-548j-3p	hsa-mir-548j	CAAAAACUGCAUUACUUUUGC	-4	0.42265	0.504038	down	1	4						9
hsa-miR-548j-5p	hsa-mir-548j	AAAAGUAAUUGCGGUCUUUGGU	-1.66667	0.42265	0.504038	down	1	1.66667						2
hsa-miR-548k	hsa-mir-548k	AAAAGUACUUGCGGAUUUUGCU	-2	0.42265	0.504038	down	1	2						3
hsa-miR-548o-3p	hsa-mir-548o	CCAAAACUGCAGUUACUUUUGC	-2.33333	0.42265	0.504038	down	1	2.33333						4
hsa-miR-548o-3p	hsa-mir-548o-2	CCAAAACUGCAGUUACUUUUGC	-2.33333	0.42265	0.504038	down	1	2.33333						4
hsa-miR-552-3p	hsa-mir-552	AACAGGUGACUGGUUAGACAA	-1.66667	0.42265	0.504038	down	1	1.66667						2
hsa-miR-5588-5p	hsa-mir-5588	ACUGGCAUUAGUGGGACUUUU	-7	0.42265	0.504038	down	1	7				18
hsa-miR-579-5p	hsa-mir-579	UCGCGGUUUGUGCCAGAUGACG	-2	0.42265	0.504038	down	1	2						3
hsa-miR-580-3p	hsa-mir-580	UUGAGAAUGAUGAAUCAUUAGG	-4	0.42265	0.504038	down	1	4						9
hsa-miR-582-3p	hsa-mir-582	UAACUGGUUGAACAACUGAACC	-20	0.42265	0.504038	down	1	20						57
hsa-miR-582-5p	hsa-mir-582	UUACAGUUGUUCAACCAGUUACU	-1.66667	0.42265	0.504038	down	1	1.66667						2
hsa-miR-584-5p	hsa-mir-584	UUAUGGUUUGCCUGGGACUGAG	-14	0.42265	0.504038	down	1	14						39
hsa-miR-589-5p	hsa-mir-589	UGAGAACCACGUCUGCUCUGAG	-20	0.42265	0.504038	down	1	20						57
hsa-miR-597-3p	hsa-mir-597	UGGUUCUCUUGUGGCUCAAGCGU	-1.66667	0.42265	0.504038	down	1	1.66667						2
hsa-miR-598-3p	hsa-mir-598	UACGUCAUCGUUGUCAUCGUCA	-1.66667	0.42265	0.504038	down	1	1.66667						2
hsa-miR-618	hsa-mir-618	AAACUCUACUUGUCCUUCUGAGU	-2	0.42265	0.504038	down	1	2						3
hsa-miR-625-5p	hsa-mir-625	AGGGGGAAAGUUCUAUAGUCC	-1.66667	0.42265	0.504038	down	1	1.66667						2
hsa-miR-627-5p	hsa-mir-627	GUGAGUCUCUAAGAAAAGAGGA	-5	0.42265	0.504038	down	1	5				12
hsa-miR-628-5p	hsa-mir-628	AUGCUGACAUAUUUACUAGAGG	-1.66667	0.42265	0.504038	down	1	1.66667						2
hsa-miR-6501-5p	hsa-mir-6501	AGUUGCCAGGGCUGCCUUUGGU	-4.66667	0.42265	0.504038	down	1	4.66667						11
hsa-miR-6502-5p	hsa-mir-6502	AGCUCUAGAAAGAUUGUUGACC	-4.66667	0.42265	0.504038	down	1	4.66667						11
hsa-miR-6503-3p	hsa-mir-6503	GGGACUAGGAUGCAGACCUCC	-2.66667	0.42265	0.504038	down	1	2.66667						5
hsa-miR-6503-5p	hsa-mir-6503	AGGUCUGCAUUCAAAUCCCCAGA	-3.66667	0.42265	0.504038	down	1	3.66667						8
hsa-miR-6513-5p	hsa-mir-6513	UUUGGGAUUGACGCCACAUGUCU	-1.66667	0.42265	0.504038	down	1	1.66667						2
hsa-miR-654-5p	hsa-mir-654	UGGUGGGCCGCAGAACAUGUGC	-4.66667	0.42265	0.504038	down	1	4.66667						11
hsa-miR-660-5p	hsa-mir-660	UACCCAUUGCAUAUCGGAGUUG	-11.3333	0.42265	0.504038	down	1	11.3333						31
hsa-miR-671-3p	hsa-mir-671	UCCGGUUCUCAGGGCUCCACC	-2.66667	0.42265	0.504038	down	1	2.66667						5
hsa-miR-6734-5p	hsa-mir-6734	UUGAGGGGAGAAUGAGGUGGAGA	-9	0.42265	0.504038	down	1	9				24
hsa-miR-6735-3p	hsa-mir-6735	AGGCCUGUGGCUCCUCCCUCAG	-5	0.42265	0.504038	down	1	5				12
hsa-miR-6753-3p	hsa-mir-6753	UGGUCUGUCUCUGCCCUGGCAC	-1.66667	0.42265	0.504038	down	1	1.66667						2
hsa-miR-6767-5p	hsa-mir-6767	UCGCAGACAGGGACACAUGGAGA	-2	0.42265	0.504038	down	1	2						3
hsa-miR-6793-3p	hsa-mir-6793	UCCCCAACCCCUGCCCGCAG	-3	0.42265	0.504038	down	1	3						6
hsa-miR-6813-5p	hsa-mir-6813	CAGGGGCUGGGGUUUCAGGUUCU	-2.66667	0.42265	0.504038	down	1	2.66667						5
hsa-miR-6842-5p	hsa-mir-6842	UGGGGGUGGUCUCUAGCCAAGG	-1.66667	0.42265	0.504038	down	1	1.66667						2
hsa-miR-6847-5p	hsa-mir-6847	ACAGAGGACAGUGGAGUGUGAGC	-2	0.42265	0.504038	down	1	2						3
hsa-miR-6853-3p	hsa-mir-6853	UGUUCAUUGGAACCCUGCGCAG	-1.66667	0.42265	0.504038	down	1	1.66667						2
hsa-miR-6866-5p	hsa-mir-6866	UUAGAGGCUGGAAUAGAGAUUCU	-3.66667	0.42265	0.504038	down	1	3.66667						8
hsa-miR-708-5p	hsa-mir-708	AAGGAGCUUACAAUCUAGCUGGG	-9	0.42265	0.504038	down	1	9				24
hsa-miR-744-3p	hsa-mir-744	CUGUUGCCACUAACCUCAACCU	-1.66667	0.42265	0.504038	down	1	1.66667						2
hsa-miR-766-5p	hsa-mir-766	AGGAGGAAUUGGUGCUGGUCUU	-1.66667	0.42265	0.504038	down	1	1.66667						2
hsa-miR-7706	hsa-mir-7706	UGAAGCGCCUGUGCUCUGCCGAGA	-3.66667	0.42265	0.504038	down	1	3.66667						8
hsa-miR-7845-5p	hsa-mir-7845	AAGGGACAGGGAGGGUCGUGG	-6	0.42265	0.504038	down	1	6					15
hsa-miR-873-3p	hsa-mir-873	GGAGACUGAUGAGUUCCCGGGA	-5	0.42265	0.504038	down	1	5				12
hsa-miR-873-5p	hsa-mir-873	GCAGGAACUUGUGAGUCUCCU	-5	0.42265	0.504038	down	1	5				12
hsa-miR-874-3p	hsa-mir-874	CUGCCCUGGCCCGAGGGACCGA	-2	0.42265	0.504038	down	1	2						3
hsa-miR-92a-1-5p	hsa-mir-92a-1	AGGUUGGGAUCGGUUGCAAUGCU	-4.66667	0.42265	0.504038	down	1	4.66667						11
hsa-miR-92b-5p	hsa-mir-92b	AGGGACGGGACGCGGUGCAGUG	-3.33333	0.42265	0.504038	down	1	3.33333						7
hsa-miR-93-3p	hsa-mir-93	ACUGCUGAGCUAGCACUUCCCG	-2	0.42265	0.504038	down	1	2						3
hsa-miR-942-5p	hsa-mir-942	UCUUCUCUGUUUUGGCCAUGUG	-11	0.42265	0.504038	down	1	11						30
hsa-miR-95-3p	hsa-mir-95	UUCAACGGGUAUUUAUUGAGCA	-8.66667	0.42265	0.504038	down	1	8.66667					23
hsa-miR-99b-3p	hsa-mir-99b	CAAGCUCGUGUCUGUGGGUCCG	-9.33333	0.42265	0.504038	down	1	9.33333						25
hsa-miR-novel-chr10_1255	hsa-mir-novel-chr10_1255	UUCCUAUGCAUAUACUUCUUU	-1.66667	0.42265	0.504038	down	1	1.66667						2
hsa-miR-novel-chr10_1266	hsa-mir-novel-chr10_1266	UUCGGGCUGGCCUGCUGCUCCGGA	-1.66667	0.42265	0.504038	down	1	1.66667						2
hsa-miR-novel-chr10_142	hsa-mir-novel-chr10_142	AGCCUGGAAGCUGGAGCCUGCA	-2.66667	0.42265	0.504038	down	1	2.66667						5
hsa-miR-novel-chr10_220	hsa-mir-novel-chr10_220	UGGCUGGCUGCUCCGGGCACUGG	-7	0.42265	0.504038	down	1	7				18
hsa-miR-novel-chr10_25	hsa-mir-novel-chr10_25	CCUCCCACUGCAGAGCCUG	-2	0.42265	0.504038	down	1	2						3
hsa-miR-novel-chr10_472	hsa-mir-novel-chr10_472	UCAGGUCUUCAGACUGUGG	-4	0.42265	0.504038	down	1	4						9
hsa-miR-novel-chr10_490	hsa-mir-novel-chr10_490	AAGGGAAAGGUAAGAAGAAAUG	-3	0.42265	0.504038	down	1	3						6
hsa-miR-novel-chr10_724	hsa-mir-novel-chr10_724	ACCCCUUCGGCUGCUGGGCC	-3	0.42265	0.504038	down	1	3						6
hsa-miR-novel-chr11_1678	hsa-mir-novel-chr11_1678	AGGAAAUGGCUGGAGCCUG	-13	0.42265	0.504038	down	1	13				36
hsa-miR-novel-chr11_1722	hsa-mir-novel-chr11_1722	UCCCUGCCCCAUGACCCCGACA	-2	0.42265	0.504038	down	1	2						3
hsa-miR-novel-chr11_1820	hsa-mir-novel-chr11_1820	AAAAGUACUUGCGGAUUUUG	-3.66667	0.42265	0.504038	down	1	3.66667						8
hsa-miR-novel-chr11_1837	hsa-mir-novel-chr11_1837	CGGGCGGGGGCGGGAGGG	-16	0.42265	0.504038	down	1	16					45
hsa-miR-novel-chr11_2096	hsa-mir-novel-chr11_2096	UUUGGGUGGGACAGACAGAAGACA	-2.66667	0.42265	0.504038	down	1	2.66667						5
hsa-miR-novel-chr11_2188	hsa-mir-novel-chr11_2188	CUGUGCGUGUGACAGCGGCUGAU	-5.66667	0.42265	0.504038	down	1	5.66667						14
hsa-miR-novel-chr11_2206	hsa-mir-novel-chr11_2206	UUCAGGUCUUGGAGACAAAU	-11	0.42265	0.504038	down	1	11					30
hsa-miR-novel-chr11_2571	hsa-mir-novel-chr11_2571	GCAUUGGAGGCUUUGGCAAGGUGU	-2	0.42265	0.504038	down	1	2						3
hsa-miR-novel-chr11_2733	hsa-mir-novel-chr11_2733	CGGUGGGGGUAGGGGGUG	-7	0.42265	0.504038	down	1	7				18
hsa-miR-novel-chr11_2812	hsa-mir-novel-chr11_2812	AAUGUGGACUGGUGUGACC	-2	0.42265	0.504038	down	1	2						3
hsa-miR-novel-chr11_2881	hsa-mir-novel-chr11_2881	GAGGGGCAGAGAGCGAG	-5	0.42265	0.504038	down	1	5						12
hsa-miR-novel-chr12_3257	hsa-mir-novel-chr12_3257	GCACAUGUAAGCUGACUGAA	-2.66667	0.42265	0.504038	down	1	2.66667						5
hsa-miR-novel-chr12_3271	hsa-mir-novel-chr12_3271	GGUUCCAUAGUGUAGUGGU	-1.66667	0.42265	0.504038	down	1	1.66667						2
hsa-miR-novel-chr12_3797	hsa-mir-novel-chr12_3797	UCUCUUCCAGGGUGGCUCUCAAC	-2	0.42265	0.504038	down	1	2						3
hsa-miR-novel-chr12_3814	hsa-mir-novel-chr12_3814	CAGCUUUCUGUAGCAGAGAUCA	-2.66667	0.42265	0.504038	down	1	2.66667						5
hsa-miR-novel-chr12_3822	hsa-mir-novel-chr12_3822	CAGCUUUCUGUAGCAGAGAUCA	-2.66667	0.42265	0.504038	down	1	2.66667						5
hsa-miR-novel-chr13_4295	hsa-mir-novel-chr13_4295	GAGAGAGGUUGAUCUUGCUGU	-2	0.42265	0.504038	down	1	2						3
hsa-miR-novel-chr14_5395	hsa-mir-novel-chr14_5395	UGGGGCUGUGUCACUGUGGGU	-3.33333	0.42265	0.504038	down	1	3.33333						7
hsa-miR-novel-chr14_5418	hsa-mir-novel-chr14_5418	ACUCCAUGGGCUUUGGACCUUGG	-26.3333	0.42265	0.504038	down	1	26.3333					76
hsa-miR-novel-chr14_5476	hsa-mir-novel-chr14_5476	AACACAAGGUAUUGGUAUUAC	-1.66667	0.42265	0.504038	down	1	1.66667						2
hsa-miR-novel-chr14_5692	hsa-mir-novel-chr14_5692	CCGGAGUUGUAAGUGUUGACA	-2.66667	0.42265	0.504038	down	1	2.66667						5
hsa-miR-novel-chr14_5713	hsa-mir-novel-chr14_5713	GUGUUGCUGUGGAUGACGU	-2	0.42265	0.504038	down	1	2						3
hsa-miR-novel-chr15_6178	hsa-mir-novel-chr15_6178	ACCCGGGAGUAGGAGACUCAGA	-5.33333	0.42265	0.504038	down	1	5.33333						13
hsa-miR-novel-chr15_6254	hsa-mir-novel-chr15_6254	UGGGAAUGGAUUGAUUGG	-2.66667	0.42265	0.504038	down	1	2.66667						5
hsa-miR-novel-chr15_6361	hsa-mir-novel-chr15_6361	UGGGCCAGACUAAGCUGGGGC	-3	0.42265	0.504038	down	1	3						6
hsa-miR-novel-chr15_6455	hsa-mir-novel-chr15_6455	GCUGCAGGGAGGAGGGUG	-1.66667	0.42265	0.504038	down	1	1.66667						2
hsa-miR-novel-chr15_6459	hsa-mir-novel-chr15_6459	UUGCUGUGAUGAUGUUCUGAGCUC	-4	0.42265	0.504038	down	1	4						9
hsa-miR-novel-chr15_6683	hsa-mir-novel-chr15_6683	CCUUCCUGUGGGACUCAGGG	-2	0.42265	0.504038	down	1	2						3
hsa-miR-novel-chr15_6741	hsa-mir-novel-chr15_6741	UGUAGGCUGAUGUUGAUACUG	-3.66667	0.42265	0.504038	down	1	3.66667						8
hsa-miR-novel-chr16_6933	hsa-mir-novel-chr16_6933	CCUCAGGCUGUAAGUGCAGGCAGA	-4.66667	0.42265	0.504038	down	1	4.66667						11
hsa-miR-novel-chr16_6954	hsa-mir-novel-chr16_6954	GAGCUUGUCGGAUGUGCAGAUU	-3	0.42265	0.504038	down	1	3						6
hsa-miR-novel-chr16_7074	hsa-mir-novel-chr16_7074	AAAAGCUGAGAAAGAGGA	-7	0.42265	0.504038	down	1	7				18
hsa-miR-novel-chr16_7382	hsa-mir-novel-chr16_7382	AGGAGAGCUCUGGUGGCCCCU	-2	0.42265	0.504038	down	1	2						3
hsa-miR-novel-chr16_7412	hsa-mir-novel-chr16_7412	UCUGGGCACAGGCGGAUGGAC	-2	0.42265	0.504038	down	1	2						3
hsa-miR-novel-chr16_7734	hsa-mir-novel-chr16_7734	CAACUGAGGUGUGCGGGCUGG	-3	0.42265	0.504038	down	1	3						6
hsa-miR-novel-chr16_7808	hsa-mir-novel-chr16_7808	AGAGUGGGACUGAAGGUUAAGU	-2.66667	0.42265	0.504038	down	1	2.66667						5
hsa-miR-novel-chr16_7844	hsa-mir-novel-chr16_7844	UGGAAGGGAUUGAAGACU	-2	0.42265	0.504038	down	1	2						3
hsa-miR-novel-chr17_8174	hsa-mir-novel-chr17_8174	CGGCCGCGGCGGAACCGG	-2.66667	0.42265	0.504038	down	1	2.66667						5
hsa-miR-novel-chr17_8235	hsa-mir-novel-chr17_8235	AUGCCCCUAAAAAUCCUUA	-1.66667	0.42265	0.504038	down	1	1.66667						2
hsa-miR-novel-chr17_8277	hsa-mir-novel-chr17_8277	ACUUGGGUGGUGGGACUGGAG	-1.66667	0.42265	0.504038	down	1	1.66667						2
hsa-miR-novel-chr17_8278	hsa-mir-novel-chr17_8278	ACUUGGGUGGUGGGACUGGAG	-1.66667	0.42265	0.504038	down	1	1.66667						2
hsa-miR-novel-chr17_8314	hsa-mir-novel-chr17_8314	UGGAGCCAGGCUGAGAAGGGGUG	-2	0.42265	0.504038	down	1	2						3
hsa-miR-novel-chr17_8327	hsa-mir-novel-chr17_8327	ACGUGGACUCCAGACUCUCUGUG	-4	0.42265	0.504038	down	1	4						9
hsa-miR-novel-chr17_8749	hsa-mir-novel-chr17_8749	AAGCCUGGGGAGGACUGUGGCA	-3	0.42265	0.504038	down	1	3						6
hsa-miR-novel-chr17_8960	hsa-mir-novel-chr17_8960	CAGGCCUGGCUGGGCUCCCUGGA	-4.33333	0.42265	0.504038	down	1	4.33333						10
hsa-miR-novel-chr17_9199	hsa-mir-novel-chr17_9199	UGGGAUGAGAAGGAUGUG	-8.66667	0.42265	0.504038	down	1	8.66667					23
hsa-miR-novel-chr17_9326	hsa-mir-novel-chr17_9326	UGCCUGGGAUAGGAAGUGAGG	-3	0.42265	0.504038	down	1	3						6
hsa-miR-novel-chr17_9375	hsa-mir-novel-chr17_9375	AGCAGGUCACGACUCAGG	-2	0.42265	0.504038	down	1	2						3
hsa-miR-novel-chr17_9421	hsa-mir-novel-chr17_9421	AAGAUGGCGGCUGAAGGCG	-4.33333	0.42265	0.504038	down	1	4.33333						10
hsa-miR-novel-chr18_9692	hsa-mir-novel-chr18_9692	CGGGCCAGGGCCGAGCGG	-2	0.42265	0.504038	down	1	2						3
hsa-miR-novel-chr18_9936	hsa-mir-novel-chr18_9936	CCCGGGAGUGUGACCCAGAG	-5	0.42265	0.504038	down	1	5				12
hsa-miR-novel-chr18_9956	hsa-mir-novel-chr18_9956	CCAGGCUGCACCAGGCUGG	-2.66667	0.42265	0.504038	down	1	2.66667						5
hsa-miR-novel-chr19_10159	hsa-mir-novel-chr19_10159	UUGGAGGUUGUAGGACCGGCG	-3.33333	0.42265	0.504038	down	1	3.33333						7
hsa-miR-novel-chr19_10327	hsa-mir-novel-chr19_10327	AUGGUUUGGGUGUGAAUUCCGG	-4.33333	0.42265	0.504038	down	1	4.33333						10
hsa-miR-novel-chr19_10393	hsa-mir-novel-chr19_10393	ACAGAGGACAGCAGGCUG	-2.66667	0.42265	0.504038	down	1	2.66667						5
hsa-miR-novel-chr19_10404	hsa-mir-novel-chr19_10404	CGCAAGCGGCUGCGGAACCGGCUGG	-3	0.42265	0.504038	down	1	3						6
hsa-miR-novel-chr19_10422	hsa-mir-novel-chr19_10422	GUUCCUGCUGAACUGAGCCAGU	-1.66667	0.42265	0.504038	down	1	1.66667						2
hsa-miR-novel-chr19_11076	hsa-mir-novel-chr19_11076	CAUGCUGUGGUUGCUUUG	-3.33333	0.42265	0.504038	down	1	3.33333						7
hsa-miR-novel-chr19_11078	hsa-mir-novel-chr19_11078	CAUGCUGUGGUUGCUUUG	-3.33333	0.42265	0.504038	down	1	3.33333						7
hsa-miR-novel-chr19_11210	hsa-mir-novel-chr19_11210	GCCGGGACUGUGCCCAGGGCU	-2	0.42265	0.504038	down	1	2						3
hsa-miR-novel-chr19_11224	hsa-mir-novel-chr19_11224	CCUGCCUGUGUACCACUCC	-2.66667	0.42265	0.504038	down	1	2.66667						5
hsa-miR-novel-chr19_11281	hsa-mir-novel-chr19_11281	GGGAAGGUGGCUCGGGGGG	-13	0.42265	0.504038	down	1	13				36
hsa-miR-novel-chr19_11346	hsa-mir-novel-chr19_11346	AGAAGGGAGGGUGAGACCUGG	-7	0.42265	0.504038	down	1	7				18
hsa-miR-novel-chr1_11665	hsa-mir-novel-chr1_11665	GCGAAGCGGUGGCUGGGCUG	-4	0.42265	0.504038	down	1	4						9
hsa-miR-novel-chr1_11715	hsa-mir-novel-chr1_11715	GCUGCAGGGAGGAGGGUG	-1.66667	0.42265	0.504038	down	1	1.66667						2
hsa-miR-novel-chr1_12335	hsa-mir-novel-chr1_12335	UGUGGCCCCAGCGUGCUGUGG	-5	0.42265	0.504038	down	1	5				12
hsa-miR-novel-chr1_12353	hsa-mir-novel-chr1_12353	UGUGGCCCCAGCGUGCUGUGG	-5	0.42265	0.504038	down	1	5				12
hsa-miR-novel-chr1_12864	hsa-mir-novel-chr1_12864	UCCUUCAUUCCACCGGAGUCU	-1.66667	0.42265	0.504038	down	1	1.66667						2
hsa-miR-novel-chr1_13193	hsa-mir-novel-chr1_13193	CCCGGGACUGGAGGGUGAGUGACGG	-2	0.42265	0.504038	down	1	2						3
hsa-miR-novel-chr1_13201	hsa-mir-novel-chr1_13201	UGGUCACUGCGAACGGGCA	-2	0.42265	0.504038	down	1	2						3
hsa-miR-novel-chr1_13277	hsa-mir-novel-chr1_13277	AGGAGCUGAAGGAGCUGAU	-1.66667	0.42265	0.504038	down	1	1.66667						2
hsa-miR-novel-chr1_13587	hsa-mir-novel-chr1_13587	GCCCGGACUGGCCGGAGGCGCG	-2.66667	0.42265	0.504038	down	1	2.66667						5
hsa-miR-novel-chr1_14120	hsa-mir-novel-chr1_14120	CAGCCUCUGCAGCUCCCCGG	-2.66667	0.42265	0.504038	down	1	2.66667						5
hsa-miR-novel-chr1_14398	hsa-mir-novel-chr1_14398	UUCAUGAGAGUUGGAUUCUCUG	-2.66667	0.42265	0.504038	down	1	2.66667						5
hsa-miR-novel-chr20_14848	hsa-mir-novel-chr20_14848	CCCUGGAUGUACAGAUGAAG	-2	0.42265	0.504038	down	1	2						3
hsa-miR-novel-chr20_15063	hsa-mir-novel-chr20_15063	AAGGUCUCUCGCCGGGCUGGG	-4	0.42265	0.504038	down	1	4						9
hsa-miR-novel-chr20_15173	hsa-mir-novel-chr20_15173	ACCCUAGGUAGACUCCAG	-2	0.42265	0.504038	down	1	2						3
hsa-miR-novel-chr20_15318	hsa-mir-novel-chr20_15318	UGGACGUUUCUGGGGCCUCA	-2	0.42265	0.504038	down	1	2						3
hsa-miR-novel-chr21_15906	hsa-mir-novel-chr21_15906	UCUCUGGGCCUGUGUCUU	-2	0.42265	0.504038	down	1	2						3
hsa-miR-novel-chr21_16083	hsa-mir-novel-chr21_16083	GCGCUGGCGGUGUGGACGCGGA	-8.66667	0.42265	0.504038	down	1	8.66667					23
hsa-miR-novel-chr21_16177	hsa-mir-novel-chr21_16177	ACCUGUAGGACUCAGAUGUG	-2	0.42265	0.504038	down	1	2						3
hsa-miR-novel-chr22_16451	hsa-mir-novel-chr22_16451	AGGCCAGGGUGGGACUGGGA	-9	0.42265	0.504038	down	1	9				24
hsa-miR-novel-chr22_16470	hsa-mir-novel-chr22_16470	GAGCAGGCUCCGGGGGACAGG	-1.66667	0.42265	0.504038	down	1	1.66667						2
hsa-miR-novel-chr22_16514	hsa-mir-novel-chr22_16514	UGGGCUUUUUGAGAACAAGGACU	-2	0.42265	0.504038	down	1	2						3
hsa-miR-novel-chr22_16567	hsa-mir-novel-chr22_16567	UGCCUGGGCUGCGGUCGGGAG	-2	0.42265	0.504038	down	1	2						3
hsa-miR-novel-chr22_16632	hsa-mir-novel-chr22_16632	AUGACUGAGUGAAGUGCUU	-2	0.42265	0.504038	down	1	2						3
hsa-miR-novel-chr22_16646	hsa-mir-novel-chr22_16646	UGGGGGGCGGUGCUGGGGCCCAGA	-1.66667	0.42265	0.504038	down	1	1.66667						2
hsa-miR-novel-chr22_16838	hsa-mir-novel-chr22_16838	UCCUCGUCCCUCGGGCCCGUGGC	-3	0.42265	0.504038	down	1	3						6
hsa-miR-novel-chr22_16845	hsa-mir-novel-chr22_16845	AGGACCUUCCCUGAACCAAGG	-2.66667	0.42265	0.504038	down	1	2.66667						5
hsa-miR-novel-chr22_16881	hsa-mir-novel-chr22_16881	AUCUGUUCCCUGGGCUGGAAGUG	-3.33333	0.42265	0.504038	down	1	3.33333						7
hsa-miR-novel-chr2_17026	hsa-mir-novel-chr2_17026	AUCUCAUGCCUGUGCUCCGGAU	-5.66667	0.42265	0.504038	down	1	5.66667				14
hsa-miR-novel-chr2_17303	hsa-mir-novel-chr2_17303	CUCCGGGUUCUGUCACUGUG	-2	0.42265	0.504038	down	1	2						3
hsa-miR-novel-chr2_17314	hsa-mir-novel-chr2_17314	GGUGGGACUGGAAGCGUCAG	-3.33333	0.42265	0.504038	down	1	3.33333						7
hsa-miR-novel-chr2_17910	hsa-mir-novel-chr2_17910	GGAGGAGGAGCUGGAGA	-11	0.42265	0.504038	down	1	11					30
hsa-miR-novel-chr2_18007	hsa-mir-novel-chr2_18007	AGGGCUGGGCCGGGCGGG	-11	0.42265	0.504038	down	1	11					30
hsa-miR-novel-chr2_18242	hsa-mir-novel-chr2_18242	CGACUGGGCGAGUGGAGGCUCC	-3.33333	0.42265	0.504038	down	1	3.33333						7
hsa-miR-novel-chr2_18413	hsa-mir-novel-chr2_18413	UCUCCGCCACCUCCACCGCGGCU	-1.66667	0.42265	0.504038	down	1	1.66667						2
hsa-miR-novel-chr2_18414	hsa-mir-novel-chr2_18414	UCUCCGCCACCUCCACCGCGGCU	-1.66667	0.42265	0.504038	down	1	1.66667						2
hsa-miR-novel-chr2_18987	hsa-mir-novel-chr2_18987	AGGGCUGGACUCAGCGGCGGAGC	-1.66667	0.42265	0.504038	down	1	1.66667						2
hsa-miR-novel-chr2_19021	hsa-mir-novel-chr2_19021	AUGAGCCUGUGGCUUUGAGGACG	-3.66667	0.42265	0.504038	down	1	3.66667						8
hsa-miR-novel-chr3_19123	hsa-mir-novel-chr3_19123	GGGGAAGAAUGAAUGAGGA	-2.66667	0.42265	0.504038	down	1	2.66667						5
hsa-miR-novel-chr3_19276	hsa-mir-novel-chr3_19276	CUCAGAGGAGCUGGCAGAG	-2	0.42265	0.504038	down	1	2						3
hsa-miR-novel-chr3_19740	hsa-mir-novel-chr3_19740	CCCUUGGACUUUUGCUGAAGUG	-6.33333	0.42265	0.504038	down	1	6.33333						16
hsa-miR-novel-chr3_19865	hsa-mir-novel-chr3_19865	AACUGCUGGAACCCACUGAGC	-7	0.42265	0.504038	down	1	7						18
hsa-miR-novel-chr3_19975	hsa-mir-novel-chr3_19975	AUUCCCAGGGAAGUGCUCUGAU	-2	0.42265	0.504038	down	1	2						3
hsa-miR-novel-chr3_19986	hsa-mir-novel-chr3_19986	UGGGAGGACUUGAAGAAGACU	-7	0.42265	0.504038	down	1	7				18
hsa-miR-novel-chr3_20007	hsa-mir-novel-chr3_20007	ACGAACUGCAAGGUCUGAAGU	-3.33333	0.42265	0.504038	down	1	3.33333						7
hsa-miR-novel-chr3_20035	hsa-mir-novel-chr3_20035	ACUUCUGCCUGUGGGUCUGAG	-7	0.42265	0.504038	down	1	7				18
hsa-miR-novel-chr3_20315	hsa-mir-novel-chr3_20315	GGGCAUACUCGUAGACCUUGCCUGA	-2.66667	0.42265	0.504038	down	1	2.66667						5
hsa-miR-novel-chr3_20465	hsa-mir-novel-chr3_20465	UGGAGAGCUGUUGAAAUGCAGA	-7	0.42265	0.504038	down	1	7				18
hsa-miR-novel-chr4_20569	hsa-mir-novel-chr4_20569	GUGGCACUGGGAAUGUGG	-3.33333	0.42265	0.504038	down	1	3.33333						7
hsa-miR-novel-chr4_20606	hsa-mir-novel-chr4_20606	ACUUUGUGUGAGGACUUUGGU	-12.6667	0.42265	0.504038	down	1	12.6667						35
hsa-miR-novel-chr4_20636	hsa-mir-novel-chr4_20636	ACCGGGCACUGUGUGGCGUG	-2	0.42265	0.504038	down	1	2						3
hsa-miR-novel-chr4_20929	hsa-mir-novel-chr4_20929	GGGGGAAUGGCUGAGGAGAUGGA	-7	0.42265	0.504038	down	1	7				18
hsa-miR-novel-chr4_21199	hsa-mir-novel-chr4_21199	AGAUGGGGAGAACUCAAUCCU	-2.66667	0.42265	0.504038	down	1	2.66667						5
hsa-miR-novel-chr4_21437	hsa-mir-novel-chr4_21437	AGGGGCUGUUUGGAGAGAC	-2.66667	0.42265	0.504038	down	1	2.66667						5
hsa-miR-novel-chr5_21729	hsa-mir-novel-chr5_21729	UAACUGGUUGAACAACUG	-1.66667	0.42265	0.504038	down	1	1.66667						2
hsa-miR-novel-chr5_21978	hsa-mir-novel-chr5_21978	AGUGGGAGGACUGUCCAGGUG	-3.33333	0.42265	0.504038	down	1	3.33333						7
hsa-miR-novel-chr5_22289	hsa-mir-novel-chr5_22289	CACGGAGCUCUGUGUGAACGG	-2.66667	0.42265	0.504038	down	1	2.66667						5
hsa-miR-novel-chr5_22445	hsa-mir-novel-chr5_22445	UCUUGGGCCCCACCCCUGGAGA	-2	0.42265	0.504038	down	1	2						3
hsa-miR-novel-chr5_22617	hsa-mir-novel-chr5_22617	UCUGGGGUCUGGCAAAGAGGAUG	-2.66667	0.42265	0.504038	down	1	2.66667						5
hsa-miR-novel-chr5_22806	hsa-mir-novel-chr5_22806	AGACUGGGCAUAGUCUGAGACAC	-2	0.42265	0.504038	down	1	2						3
hsa-miR-novel-chr5_22954	hsa-mir-novel-chr5_22954	UCCGGUGUGGAGUCUGGAGACGA	-3	0.42265	0.504038	down	1	3						6
hsa-miR-novel-chr5_22983	hsa-mir-novel-chr5_22983	AUCUGAAAUCUGAUGAGAAAUU	-2	0.42265	0.504038	down	1	2						3
hsa-miR-novel-chr6_23423	hsa-mir-novel-chr6_23423	CUGAGUGUGGGACCUCUG	-6	0.42265	0.504038	down	1	6					15
hsa-miR-novel-chr6_23477	hsa-mir-novel-chr6_23477	GUGGCUGGGGGAAAGGCGGG	-2	0.42265	0.504038	down	1	2						3
hsa-miR-novel-chr6_23498	hsa-mir-novel-chr6_23498	UCAGGUGUGGAAACUGAGGCAGG	-2.66667	0.42265	0.504038	down	1	2.66667						5
hsa-miR-novel-chr6_24135	hsa-mir-novel-chr6_24135	GGGGGUGUAGCUCAGUGGU	-59	0.42265	0.504038	down	1	59						174
hsa-miR-novel-chr7_24860	hsa-mir-novel-chr7_24860	AGUGCCUGAGGGAGUAAGAGC	-5	0.42265	0.504038	down	1	5						12
hsa-miR-novel-chr7_24866	hsa-mir-novel-chr7_24866	AGUGCCUGAGGGAGUAAGAGC	-5	0.42265	0.504038	down	1	5						12
hsa-miR-novel-chr7_24975	hsa-mir-novel-chr7_24975	CCUGCUCUGUGACUCUGAGACA	-1.66667	0.42265	0.504038	down	1	1.66667						2
hsa-miR-novel-chr7_25009	hsa-mir-novel-chr7_25009	UUUGUCUGUGCCUGCAGG	-2.66667	0.42265	0.504038	down	1	2.66667						5
hsa-miR-novel-chr7_25349	hsa-mir-novel-chr7_25349	GUGAGGGCUCUGAGGAUGAACC	-7	0.42265	0.504038	down	1	7				18
hsa-miR-novel-chr7_25708	hsa-mir-novel-chr7_25708	CCUGCUCUGUGACUCUGAGACA	-1.66667	0.42265	0.504038	down	1	1.66667						2
hsa-miR-novel-chr7_26023	hsa-mir-novel-chr7_26023	AUGGCACUGGUAGAAUUCACUG	-1.58491	0.42265	0.504038	down	17.6667	28			50			81
hsa-miR-novel-chr8_26516	hsa-mir-novel-chr8_26516	UGGGCUGCGUCAGGCUGAGC	-4.33333	0.42265	0.504038	down	1	4.33333						10
hsa-miR-novel-chr8_26580	hsa-mir-novel-chr8_26580	ACUGGGAUUGUCCAUCAUGAUG	-2.66667	0.42265	0.504038	down	1	2.66667						5
hsa-miR-novel-chr8_26767	hsa-mir-novel-chr8_26767	AGAUGAGGCAGGCUCUGCUACGU	-2	0.42265	0.504038	down	1	2						3
hsa-miR-novel-chr8_26792	hsa-mir-novel-chr8_26792	UGGGAAUGAGGCUUUGGGCGACA	-3	0.42265	0.504038	down	1	3						6
hsa-miR-novel-chr8_26817	hsa-mir-novel-chr8_26817	AGAGGCUGUUUCUGAGCU	-7.13043	0.42265	0.504038	down	7.66667	54.6667			20			161
hsa-miR-novel-chr8_26918	hsa-mir-novel-chr8_26918	GUGAACUAUGCCUGGGC	-1.56522	0.42265	0.504038	down	7.66667	12			20			33
hsa-miR-novel-chr8_27018	hsa-mir-novel-chr8_27018	GUGGGCUUAGAUCAGGUCUGUUCC	-2	0.42265	0.504038	down	1	2						3
hsa-miR-novel-chr8_27145	hsa-mir-novel-chr8_27145	AGCACUUGUGGAUGCUGAG	-2.66667	0.42265	0.504038	down	1	2.66667						5
hsa-miR-novel-chr9_27922	hsa-mir-novel-chr9_27922	AACGGAUGGCUCUGCCCA	-2	0.42265	0.504038	down	1	2						3
hsa-miR-novel-chr9_28118	hsa-mir-novel-chr9_28118	GUUCCUGCUGAACUGAGCCAGU	-1.66667	0.42265	0.504038	down	1	1.66667						2
hsa-miR-novel-chr9_28145	hsa-mir-novel-chr9_28145	CUGUGUCGGGCAUUACCAGAA	-2.66667	0.42265	0.504038	down	1	2.66667						5
hsa-miR-novel-chr9_28270	hsa-mir-novel-chr9_28270	AUUUUGCUGUGGAGCGGCG	-3	0.42265	0.504038	down	1	3						6
hsa-miR-novel-chrX_29172	hsa-mir-novel-chrX_29172	ACUCCAGCCCCACAGCCUCAG	-8.33333	0.42265	0.504038	down	1	8.33333						22
hsa-miR-145-3p	hsa-mir-145	GGAUUCCUGGAAAUACUGUUCU	23.6667	0.42265	0.504038	up	23.6667	1	68
hsa-miR-15b-3p	hsa-mir-15b	CGAAUCAUUAUUUGCUGCUCUA	1.91667	0.42265	0.504038	up	7.66667	4			20			9
hsa-miR-184	hsa-mir-184	UGGACGGAGAACUGAUAAGGGU	11	0.42265	0.504038	up	11	1			30
hsa-miR-1910-3p	hsa-mir-1910	GAGGCAGAAGCAGGAUGACA	5.375	0.42265	0.504038	up	14.3333	2.66667			40			5
hsa-miR-205-5p	hsa-mir-205	UCCUUCAUUCCACCGGAGUCUG	6	0.42265	0.504038	up	6	1			15
hsa-miR-216b-5p	hsa-mir-216b	AAAUCUCUGCAGGCAAAUGUGA	9.66667	0.42265	0.504038	up	9.66667	1		26
hsa-miR-3120-3p	hsa-mir-3120	CACAGCAAGUGUAGACAGGCA	11	0.42265	0.504038	up	11	1			30
hsa-miR-3127-3p	hsa-mir-3127	UCCCCUUCUGCAGGCCUGCUGG	14	0.42265	0.504038	up	14	1		39
hsa-miR-335-5p	hsa-mir-335	UCAAGAGCAAUAACGAAAAAUGU	7.66667	0.42265	0.504038	up	7.66667	1			20
hsa-miR-33a-5p	hsa-mir-33a	GUGCAUUGUAGUUGCAUUGCA	11	0.42265	0.504038	up	11	1			30
hsa-miR-365a-3p	hsa-mir-365a	UAAUGCCCCUAAAAAUCCUUAU	6	0.42265	0.504038	up	6	1			15
hsa-miR-365b-3p	hsa-mir-365b	UAAUGCCCCUAAAAAUCCUUAU	6	0.42265	0.504038	up	6	1			15
hsa-miR-378f	hsa-mir-378f	ACUGGACUUGGAGCCAGAAG	3.83333	0.42265	0.504038	up	7.66667	2			20			3
hsa-miR-651-5p	hsa-mir-651	UUUAGGAUAAGCUUGACUUUUG	4.125	0.42265	0.504038	up	11	2.66667			30			5
hsa-miR-659-5p	hsa-mir-659	AGGACCUUCCCUGAACCAAGGA	7.66667	0.42265	0.504038	up	7.66667	1			20
hsa-miR-664a-3p	hsa-mir-664a	UAUUCAUUUAUCCCCAGCCUACA	14.6	0.42265	0.504038	up	24.3333	1.66667			70			2
hsa-miR-6741-5p	hsa-mir-6741	GUGGGUGCUGGUGGGAGCCGUG	3.83333	0.42265	0.504038	up	7.66667	2			20			3
hsa-miR-6786-3p	hsa-mir-6786	UGACGCCCCUUCUGAUUCUGCCU	16	0.42265	0.504038	up	16	1	45
hsa-miR-6846-5p	hsa-mir-6846	UGGGGGCUGGAUGGGGUAGAGU	18.3333	0.42265	0.504038	up	18.3333	1		52
hsa-miR-92b-3p	hsa-mir-92b	UAUUGCACUCGUCCCGGCCUCC	3.83333	0.42265	0.504038	up	7.66667	2			20			3
hsa-miR-96-5p	hsa-mir-96	UUUGGCACUAGCACAUUUUUGCU	3.3	0.42265	0.504038	up	11	3.33333			30			7
hsa-miR-novel-chr10_143	hsa-mir-novel-chr10_143	CAAGGACUGCAAUUACUUUUGC	21	0.42265	0.504038	up	21	1			60
hsa-miR-novel-chr10_891	hsa-mir-novel-chr10_891	CUGGGACUGCAGUGGGUC	22.6667	0.42265	0.504038	up	22.6667	1		65
hsa-miR-novel-chr11_2017	hsa-mir-novel-chr11_2017	GCCCAGGGCUGAGGCGAGAGG	40	0.42265	0.504038	up	40	1		117
hsa-miR-novel-chr11_2136	hsa-mir-novel-chr11_2136	AGGCGGAGGUGGAGGGAG	40	0.42265	0.504038	up	40	1		117
hsa-miR-novel-chr11_2204	hsa-mir-novel-chr11_2204	AAGCUGCAGGCUGGAGGCUGCUG	22.6667	0.42265	0.504038	up	22.6667	1		65
hsa-miR-novel-chr11_2272	hsa-mir-novel-chr11_2272	UCUGGCUGAGGAGGAAGUGGA	53	0.42265	0.504038	up	53	1		156
hsa-miR-novel-chr12_3006	hsa-mir-novel-chr12_3006	AGGAGUGUGAGGAGCUGAAGGAAA	31.3333	0.42265	0.504038	up	31.3333	1		91
hsa-miR-novel-chr12_3625	hsa-mir-novel-chr12_3625	CGGAGCUGGGGGGUCCCUG	44.3333	0.42265	0.504038	up	44.3333	1		130
hsa-miR-novel-chr12_3956	hsa-mir-novel-chr12_3956	CUCUUCUGGGCUGUUCUUU	57.3333	0.42265	0.504038	up	57.3333	1		169
hsa-miR-novel-chr12_4116	hsa-mir-novel-chr12_4116	CUGAGGUCUGGAGUGGACGAUG	22.6667	0.42265	0.504038	up	22.6667	1		65
hsa-miR-novel-chr13_4647	hsa-mir-novel-chr13_4647	UCUGUGUGUUUGGGGCUGCUUUGU	48.6667	0.42265	0.504038	up	48.6667	1		143
hsa-miR-novel-chr14_5243	hsa-mir-novel-chr14_5243	UGGGCCAGAUGAAGUGGGAAC	11	0.42265	0.504038	up	11	1			30
hsa-miR-novel-chr16_7801	hsa-mir-novel-chr16_7801	AGGCCUGGGGGCUGAAGAGG	35.6667	0.42265	0.504038	up	35.6667	1		104
hsa-miR-novel-chr17_8597	hsa-mir-novel-chr17_8597	CUGGGAUGAGAUGAGACUGGAG	11	0.42265	0.504038	up	11	1			30
hsa-miR-novel-chr17_8838	hsa-mir-novel-chr17_8838	AGGGAGGACCAGAAGGACUGGGG	23.6667	0.42265	0.504038	up	23.6667	1	68
hsa-miR-novel-chr18_9811	hsa-mir-novel-chr18_9811	GAAAGAGUGGGAGGAAGA	22.6667	0.42265	0.504038	up	22.6667	1		65
hsa-miR-novel-chr18_9923	hsa-mir-novel-chr18_9923	GGGGGCUGUAGGAUUCUCAGGUAG	27	0.42265	0.504038	up	27	1		78
hsa-miR-novel-chr19_10242	hsa-mir-novel-chr19_10242	GGGGCUGGCUGGGCAGGAGA	35.6667	0.42265	0.504038	up	35.6667	1		104
hsa-miR-novel-chr19_11108	hsa-mir-novel-chr19_11108	GGGAUGAAGGUGGAACUGG	48.6667	0.42265	0.504038	up	48.6667	1		143
hsa-miR-novel-chr19_11309	hsa-mir-novel-chr19_11309	AGGGCUGCAGAGAGGGAG	44.3333	0.42265	0.504038	up	44.3333	1		130
hsa-miR-novel-chr19_11538	hsa-mir-novel-chr19_11538	GCGGGGCCUGGUGGCGGCUG	40	0.42265	0.504038	up	40	1		117
hsa-miR-novel-chr1_12952	hsa-mir-novel-chr1_12952	GCUGGCCGGGCUGGCUGCG	27	0.42265	0.504038	up	27	1		78
hsa-miR-novel-chr1_13147	hsa-mir-novel-chr1_13147	GAGGUCUGGGAGGCUGGG	40	0.42265	0.504038	up	40	1		117
hsa-miR-novel-chr1_13400	hsa-mir-novel-chr1_13400	AGGAGGGGACGGCAGCACCA	31.3333	0.42265	0.504038	up	31.3333	1		91
hsa-miR-novel-chr1_13462	hsa-mir-novel-chr1_13462	CUGCCAGGGGAGCUCUGCUG	18.3333	0.42265	0.504038	up	18.3333	1		52
hsa-miR-novel-chr1_14144	hsa-mir-novel-chr1_14144	AGGGAAGGAGAGAGCCUG	31.3333	0.42265	0.504038	up	31.3333	1		91
hsa-miR-novel-chr20_14869	hsa-mir-novel-chr20_14869	AGAGGCUGGAGAGUCAAA	22.6667	0.42265	0.504038	up	22.6667	1		65
hsa-miR-novel-chr20_15216	hsa-mir-novel-chr20_15216	AGCCAGGCUCUGAAGGGAAA	9.66667	0.42265	0.504038	up	9.66667	1		26
hsa-miR-novel-chr22_16420	hsa-mir-novel-chr22_16420	GAAAGGAGAAGAAAAGGG	40	0.42265	0.504038	up	40	1		117
hsa-miR-novel-chr2_17080	hsa-mir-novel-chr2_17080	AGGGAGAUGAAGAGGAC	14.3333	0.42265	0.504038	up	14.3333	1			40
hsa-miR-novel-chr2_17173	hsa-mir-novel-chr2_17173	AAGAAGAGGAAGAAAGAGAGAGGAA	48.6667	0.42265	0.504038	up	48.6667	1		143
hsa-miR-novel-chr2_17233	hsa-mir-novel-chr2_17233	UGGGAGAAAAGAAAGGGG	11	0.42265	0.504038	up	11	1			30
hsa-miR-novel-chr2_17948	hsa-mir-novel-chr2_17948	UGAGGAAGAAGAGGAUGGAAGG	18.3333	0.42265	0.504038	up	18.3333	1		52
hsa-miR-novel-chr2_18130	hsa-mir-novel-chr2_18130	UGGCUGGCCCGUGGGGCG	27	0.42265	0.504038	up	27	1		78
hsa-miR-novel-chr2_18305	hsa-mir-novel-chr2_18305	ACAGGAGUGGGGGGUGGGACGU	54.3333	0.42265	0.504038	up	54.3333	1		160
hsa-miR-novel-chr2_18306	hsa-mir-novel-chr2_18306	ACAGGAGUGGGGGGUGGGACGU	54.3333	0.42265	0.504038	up	54.3333	1		160
hsa-miR-novel-chr2_18595	hsa-mir-novel-chr2_18595	AAGGGCAGGGACUGCACGGG	11	0.42265	0.504038	up	11	1			30
hsa-miR-novel-chr5_21721	hsa-mir-novel-chr5_21721	AGAGCUGGGGAAGACGCUG	7.66667	0.42265	0.504038	up	7.66667	1			20
hsa-miR-novel-chr5_22795	hsa-mir-novel-chr5_22795	AGUGAAACUGGAAAAUGAAACU	53	0.42265	0.504038	up	53	1		156
hsa-miR-novel-chr5_22853	hsa-mir-novel-chr5_22853	CCCGGGCUGGGCGCGAAGAGAGGA	44.3333	0.42265	0.504038	up	44.3333	1		130
hsa-miR-novel-chr5_22869	hsa-mir-novel-chr5_22869	GAGGAGAGAAGGGCUGGGG	35.6667	0.42265	0.504038	up	35.6667	1		104
hsa-miR-novel-chr6_23897	hsa-mir-novel-chr6_23897	UCUGGCUGAGGAGGAAGUGGA	53	0.42265	0.504038	up	53	1		156
hsa-miR-novel-chr7_24973	hsa-mir-novel-chr7_24973	CUGGGACUGCAGUGGGUC	22.6667	0.42265	0.504038	up	22.6667	1		65
hsa-miR-novel-chr7_25446	hsa-mir-novel-chr7_25446	GAAAAGGAGGAAGGGAUGGACAG	31.3333	0.42265	0.504038	up	31.3333	1		91
hsa-miR-novel-chr8_26637	hsa-mir-novel-chr8_26637	UGGACCUCGGGGCUGGGGCUG	40	0.42265	0.504038	up	40	1		117
hsa-miR-novel-chr8_27099	hsa-mir-novel-chr8_27099	GCUUGGAGAAUGAAGGAG	31	0.42265	0.504038	up	31	1	90
hsa-miR-novel-chr9_27273	hsa-mir-novel-chr9_27273	GGAGUAGGAGGCUGCGGAGA	44.3333	0.42265	0.504038	up	44.3333	1		130
hsa-miR-novel-chr9_27483	hsa-mir-novel-chr9_27483	UGGGGCUGUGGUGGCCAGA	11	0.42265	0.504038	up	11	1			30
hsa-miR-novel-chrX_28461	hsa-mir-novel-chrX_28461	CUGCCUCUUCGAGCUCCUGGGG	12	0.42265	0.504038	up	12	1		33
hsa-miR-novel-chrX_28471	hsa-mir-novel-chrX_28471	CCGGGGAGGAAAGGCUGGCG	7.66667	0.42265	0.504038	up	7.66667	1		20
hsa-miR-novel-chrX_28654	hsa-mir-novel-chrX_28654	CGGCGGGGGCGGCGCGCG	35.6667	0.42265	0.504038	up	35.6667	1		104
hsa-miR-novel-chrX_28914	hsa-mir-novel-chrX_28914	CUGCCUCUUCGAGCUCCUGGGG	12	0.42265	0.504038	up	12	1		33
hsa-miR-novel-chrY_29361	hsa-mir-novel-chrY_29361	CUGCCUCUUCGAGCUCCUGGGG	12	0.42265	0.504038	up	12	1		33
hsa-miR-novel-chrY_29371	hsa-mir-novel-chrY_29371	CCGGGGAGGAAAGGCUGGCG	7.66667	0.42265	0.504038	up	7.66667	1		20
hsa-miR-novel-chrY_29422	hsa-mir-novel-chrY_29422	CUGCCUCUUCGAGCUCCUGGGG	12	0.42265	0.504038	up	12	1		33
hsa-miR-199b-5p	hsa-mir-199b	CCCAGUGUUUAGACUAUCUGUUC	-1.96094	0.426428	0.506941	down	42.6667	83.6667			125	92	72	84
hsa-miR-21-3p	hsa-mir-21	CAACACCAGUCGAUGGGCUGU	-19.2174	0.426562	0.506941	down	7.66667	147.333		20		18		421
hsa-miR-378a-5p	hsa-mir-378a	CUCCUGACUCCAGGUCCUGUGU	5.18367	0.427238	0.506941	up	84.6667	16.3333		221	30	12	15	19
hsa-miR-novel-chr5_22357	hsa-mir-novel-chr5_22357	GGGGAUGUAGCUCAGUGGU	-3.31034	0.436268	0.516787	down	58	192	45	26	100	24	38	511
hsa-miR-novel-chr5_22400	hsa-mir-novel-chr5_22400	CUCUUCAGGAUCUGUGGGUAGC	15.6667	0.441986	0.522684	up	31.3333	2		91				3
hsa-miR-novel-chr15_6007	hsa-mir-novel-chr15_6007	UGGACUUGGAGUCAGAAG	-1.65686	0.442884	0.52287	down	34	56.3333		52	47	56	86	24
hsa-miR-novel-chr9_27523	hsa-mir-novel-chr9_27523	AUCACAUUGCCAGGGAUU	-10.9868	0.446951	0.526516	down	50.3333	553	83	35	30	20	33	1603
hsa-miR-200b-3p	hsa-mir-200b	UAAUACUGCCUGGUAAUGAUGA	2.45833	0.447464	0.526516	up	39.3333	16	45		70	30	15
hsa-miR-1299	hsa-mir-1299	UUCUGGAAUUCUGUGUGAGGGA	9.6	0.448854	0.527273	up	16	1.66667	45					2
hsa-miR-27a-3p	hsa-mir-27a	UUCACAGUGGCUAAGUUCCGC	1.62474	0.465123	0.545477	up	512.333	315.333	452	325	757	483	340	120
hsa-miR-93-5p	hsa-mir-93	CAAAGUGCUGUUCGUGCAGGUAG	1.24351	0.480146	0.562161	up	1452	1167.67	1876	1132	1345	977	945	1578
hsa-miR-744-5p	hsa-mir-744	UGCGGGGCUAGGGCUAACAGCA	-2.93564	0.485713	0.567737	down	202	593	249	195	159	191	113	1472
hsa-miR-363-3p	hsa-mir-363	AAUUGCACGGUAUCCAUCUGUA	-2.6129	0.490792	0.572726	down	41.3333	108	45	26	50	30	15	276
hsa-miR-novel-chr2_17891	hsa-mir-novel-chr2_17891	UGCGUGGGAGGAAGGACCAGGC	7.13333	0.492633	0.573926	up	35.6667	5		104		12
hsa-miR-374a-3p	hsa-mir-374a	CUUAUCAGAUUGUAUUGUAAUU	-3.92453	0.498429	0.579722	down	17.6667	69.3333			50	167	38
hsa-miR-21-5p	hsa-mir-21	UAGCUUAUCAGACUGAUGUUGA	1.33705	0.500679	0.581381	up	11903.3	8902.67	13549	6542	15616	11753	9230	5722
hsa-miR-novel-chr8_26363	hsa-mir-novel-chr8_26363	AAAAGCUGGGUUGAGAGG	2.92	0.515522	0.597297	up	24.3333	8.33333		54	16	16		6
hsa-miR-1268a	hsa-mir-1268a	CGGGCGUGGUGGUGGGGG	4.9	0.516078	0.597297	up	16.3333	3.33333		46				7
hsa-miR-340-5p	hsa-mir-340	UUAUAAAGCAAUGAGACUGAUU	-1.54957	0.52391	0.60525	down	383.333	594	429	130	588	1079	408	292
hsa-miR-3613-5p	hsa-mir-3613	UGUUGUACUUUUUUUUUUGUUC	-2.62238	0.524664	0.60525	down	47.6667	125			140	221	129	22
hsa-let-7a-3p	hsa-let-7a-1	CUAUACAAUCUACUGUCUUUC	-1.82609	0.530112	0.609542	down	7.66667	14			20	18	11	10
hsa-let-7a-3p	hsa-let-7a-3	CUAUACAAUCUACUGUCUUUC	-1.82609	0.530112	0.609542	down	7.66667	14			20	18	11	10
hsa-miR-409-3p	hsa-mir-409	GAAUGUUGCUCGGUGAACCCCU	2.65714	0.543463	0.623878	up	31	11.6667	90			18		14
hsa-miR-223-5p	hsa-mir-223	CGUGUAUUUGACAAGCUGAGUU	-1.83544	0.546046	0.625825	down	26.3333	48.3333		26	50	83	15	44
hsa-miR-novel-chrX_29247	hsa-mir-novel-chrX_29247	UUUUGCGAUGUGUUCCUAAU	-2.07692	0.550603	0.630025	down	8.66667	18			23	30	13	8
hsa-miR-novel-chr2_17520	hsa-mir-novel-chr2_17520	CUGCUGGGAGAACUGGAG	4.05	0.554626	0.633602	up	27	6.66667		78		12		5
hsa-miR-17-3p	hsa-mir-17	ACUGCAGUGAAGGCACUUGUAG	-2.03175	0.561401	0.640306	down	21	42.6667			60	66	38	21
hsa-miR-548e-3p	hsa-mir-548e	AAAAACUGAGACUACUUUUGCA	-2.6087	0.566204	0.644742	down	7.66667	20			20	48		9
hsa-miR-330-5p	hsa-mir-330	UCUCUGGGCCUGUGUCUUAGGC	2.33333	0.567951	0.645689	up	16.3333	7		26	20	18
hsa-miR-10a-5p	hsa-mir-10a	UACCCUGUAGAUCCGAAUUUGUG	1.90299	0.569564	0.646483	up	85	44.6667	45	182	25	51	23	57
hsa-miR-29c-3p	hsa-mir-29c	UAGCACCAUUUGAAAUCGGUUA	-3.13208	0.57439	0.650914	down	17.6667	55.3333			50	149		14
hsa-let-7d-3p	hsa-let-7d	CUAUACGACCUGCUGCCUUUCU	1.25628	0.580917	0.657256	up	166.667	132.667	226	52	219	89	83	223
hsa-miR-181a-3p	hsa-mir-181a-1	ACCAUCGACCGUUGAUUGUACC	1.95	0.586124	0.662086	up	26	13.3333	45		30		23	14
hsa-let-7e-5p	hsa-let-7e	UGAGGUAGGAGGUUGUAUAGUU	-1.60109	0.593145	0.668946	down	61	97.6667	90		90	173	106	11
hsa-miR-107	hsa-mir-107	AGCAGCAUUGUACAGGGCUAUCA	-1.5	0.600996	0.67672	down	16	24	45			30	30	9
hsa-miR-130a-3p	hsa-mir-130a	CAGUGCAAUGUUAAAAGGGCAU	-2.09434	0.602086	0.676867	down	17.6667	37			50	72	23	13
hsa-miR-15b-5p	hsa-mir-15b	UAGCAGCACAUCAUGGUUUACA	1.52841	0.607846	0.682257	up	89.6667	58.6667	68	39	159	113	30	30
hsa-miR-450b-5p	hsa-mir-450b	UUUUGCAAUAUGUUCCUGAAUA	2.86667	0.612899	0.68632	up	14.3333	5			40	12
hsa-miR-181a-5p	hsa-mir-181a-2	AACAUUCAACGCUGUCGGUGAGU	-1.43011	0.614383	0.68632	down	124	177.333	153	104	112	77	113	339
hsa-miR-181a-5p	hsa-mir-181a-1	AACAUUCAACGCUGUCGGUGAGU	-1.43011	0.614383	0.68632	down	124	177.333	153	104	112	77	113	339
hsa-miR-23a-3p	hsa-mir-23a	AUCACAUUGCCAGGGAUUUCC	-1.64789	0.625302	0.697414	down	1793	2954.67	2803	1158	1415	1150	1187	6524
hsa-miR-195-5p	hsa-mir-195	UAGCAGCACAGAAAUAUUGGC	2.66667	0.634852	0.706948	up	16	6	45				15
hsa-miR-127-3p	hsa-mir-127	UCGGAUCCGUCUGAGCUUGGCU	1.86667	0.644075	0.716089	up	46.6667	25		117	20	45	23	4
hsa-miR-100-5p	hsa-mir-100	AACCCGUAGAUCCGAACUUGUG	1.46392	0.67066	0.744475	up	142	97	136	247	40	89	45	154
hsa-miR-493-5p	hsa-mir-493	UUGUACAUGGUAGGCUUUCAUU	2.2	0.678366	0.751847	up	11	5			30	12
hsa-miR-126-3p	hsa-mir-126	UCGUACCGUGAGUAAUAAUGCG	1.22779	0.681586	0.754231	up	1045.67	851.667	881	1366	887	1222	370	960
hsa-miR-382-5p	hsa-mir-382	GAAGUUGUUCGUGGUGGAUUCG	1.34343	0.686313	0.758273	up	44.3333	33	90		40	36	30	30
hsa-miR-450a-5p	hsa-mir-450a-1	UUUUGCGAUGUGUUCCUAAUAU	1.95455	0.699232	0.770137	up	14.3333	7.33333			40	16		3
hsa-miR-450a-5p	hsa-mir-450a-2	UUUUGCGAUGUGUUCCUAAUAU	1.95455	0.699232	0.770137	up	14.3333	7.33333			40	16		3
hsa-miR-139-5p	hsa-mir-139	UCUACAGUGCACGUGUCUCCAGU	-1.50847	0.711164	0.781982	down	19.6667	29.6667		26	30	54		32
hsa-miR-19a-3p	hsa-mir-19a	UGUGCAAAUCUAUGCAAAACUGA	-1.90789	0.713119	0.781982	down	50.6667	96.6667			149	238	38	11
hsa-miR-151a-5p	hsa-mir-151a	UCGAGGAGCUCACAGUCUAGU	-2	0.713309	0.781982	down	6	12			15	33
hsa-miR-novel-chr7_25490	hsa-mir-novel-chr7_25490	UGAGCGCCUCGACGACAGAGC	-1.19255	0.714755	0.782352	down	53.6667	64	45	78	35	57	45	87
hsa-miR-500a-3p	hsa-mir-500a	AUGCACCUGGGCAAGGAUUCUG	-1.48387	0.743393	0.812439	down	41.3333	61.3333		91	30	12	23	146
hsa-miR-30e-3p	hsa-mir-30e	CUUUCAGUCGGAUGUUUACAGC	-1.23596	0.757521	0.826055	down	178	220	158	104	269	399	159	99
hsa-miR-134-5p	hsa-mir-134	UGUGACUGGUUGACCAGAGGGG	1.3104	0.758192	0.826055	up	869.667	663.667	542	559	1505	709	1126	153
hsa-miR-3198	hsa-mir-3198-1	GUGGAGUCCUGGGGAAUGGAGA	1.17808	0.76782	0.833971	up	28.6667	24.3333	57	26		27	34	9
hsa-miR-3198	hsa-mir-3198-2	GUGGAGUCCUGGGGAAUGGAGA	1.17808	0.76782	0.833971	up	28.6667	24.3333	57	26		27	34	9
hsa-miR-378a-3p	hsa-mir-378a	ACUGGACUUGGAGUCAGAAGGC	-1.32057	0.770689	0.835801	down	2900	3829.67	4317	2237	2143	1311	1708	8467
hsa-miR-novel-chr5_23088	hsa-mir-novel-chr5_23088	GCUGGGGAGGUGAACUGGUG	1.74359	0.774665	0.836891	up	22.6667	13		65		36
hsa-miR-24-3p	hsa-mir-24-1	UGGCUCAGUUCAGCAGGAACAG	-1.28242	0.775251	0.836891	down	1922.67	2465.67	2599	1606	1560	969	1051	5374
hsa-miR-24-3p	hsa-mir-24-2	UGGCUCAGUUCAGCAGGAACAG	-1.28242	0.775251	0.836891	down	1922.67	2465.67	2599	1606	1560	969	1051	5374
hsa-miR-320a-3p	hsa-mir-320a	AAAAGCUGGGUUGAGAGGGCGA	-1.26794	0.785999	0.847199	down	91224	115667	18329	113878	141462	149221	185961	11815
hsa-miR-186-5p	hsa-mir-186	CAAAGAAUUCUCCUUUUGGGCU	-1.2604	0.789388	0.849554	down	592.667	747	972	325	478	346	310	1582
hsa-miR-509-3-5p	hsa-mir-509-3	UACUGCAGACGUGGCAAUCAUG	1.30189	0.791024	0.850019	up	23	17.6667		26	40	24	23	3
hsa-miR-15a-5p	hsa-mir-15a	UAGCAGCACAUAAUGGUUUGUG	-1.42308	0.79394	0.851857	down	60.6667	86.3333			179	125	98	33
hsa-miR-505-5p	hsa-mir-505	GGGAGCCAGGAAGUAUUGAUGU	-1.52174	0.80197	0.859167	down	7.66667	11.6667			20	30		2
hsa-miR-374b-5p	hsa-mir-374b	AUAUAAUACAACCUGCUAAGUG	-1.39474	0.804826	0.86092	down	50.6667	70.6667		39	110	155	30	24
hsa-let-7i-5p	hsa-let-7i	UGAGGUAGUAGUUUGUGCUGUU	-1.10104	0.821808	0.877755	down	17174	18909.3	23754	11003	16762	14966	10605	31154
hsa-miR-378d	hsa-mir-378d-2	ACUGGACUUGGAGUCAGAAA	-1.05479	0.824701	0.878188	down	73	77	34	137	45	66	140	22
hsa-miR-378d	hsa-mir-378d-1	ACUGGACUUGGAGUCAGAAA	-1.05479	0.824701	0.878188	down	73	77	34	137	45	66	140	22
hsa-miR-490-3p	hsa-mir-490	CAACCUGGAGGACUCCAUGCUG	-1.4691	0.826584	0.878868	down	210.333	309		449	179	879	38	7
hsa-let-7g-5p	hsa-let-7g	UGAGGUAGUAGUUUGUACAGUU	1.11675	0.839389	0.889315	up	11739.7	10512.3	12408	6165	16643	16867	9910	4757
hsa-miR-889-3p	hsa-mir-889	UUAAUAUCGGACAACCAUUGU	-1.43478	0.839872	0.889315	down	7.66667	11			20		30
hsa-miR-374a-5p	hsa-mir-374a	UUAUAAUACAACCUGAUAAGUG	-1.38272	0.841298	0.889315	down	54	74.6667			159	143	76	2
hsa-let-7f-5p	hsa-let-7f-1	UGAGGUAGUAGAUUGUAUAGUU	1.13648	0.842708	0.889315	up	6070.33	5341.33	6792	3752	7664	10573	4789	659
hsa-let-7f-5p	hsa-let-7f-2	UGAGGUAGUAGAUUGUAUAGUU	1.13648	0.842708	0.889315	up	6070.33	5341.33	6792	3752	7664	10573	4789	659
hsa-miR-novel-chr1_14381	hsa-mir-novel-chr1_14381	AACAUUCAUUGCUGUCGGUGG	1.16667	0.848581	0.892381	up	30.3333	26	68		20	24	20	31
hsa-miR-19b-3p	hsa-mir-19b-1	UGUGCAAAUCCAUGCAAAACUGA	1.15989	0.849419	0.892381	up	142.667	123	102	39	284	182	102	82
hsa-miR-19b-3p	hsa-mir-19b-2	UGUGCAAAUCCAUGCAAAACUGA	1.15989	0.849419	0.892381	up	142.667	123	102	39	284	182	102	82
hsa-miR-574-3p	hsa-mir-574	CACGCUCAUGCACACACCCACA	-1.13265	0.851046	0.892381	down	32.6667	37	45		50	30	45	33
hsa-miR-379-5p	hsa-mir-379	UGGUAGACUAUGGAACGUAGG	1.20588	0.851933	0.892381	up	41	34	90		30	18	15	66
hsa-miR-22-3p	hsa-mir-22	AAGCUGCCAGUUGAAGAACUGU	-1.1403	0.861007	0.900549	down	7286.67	8309	10396	5840	5621	3648	4891	16385
hsa-miR-193a-5p	hsa-mir-193a	UGGGUCUUUGCGGGCGAGAUGA	-1.16255	0.883397	0.921077	down	162	188.333		234	249	322	212	28
hsa-miR-132-3p	hsa-mir-132	UAACAGUCUACAGCCAUGGUCG	1.15152	0.88453	0.921077	up	12.6667	11		20	15			30
hsa-miR-novel-chr10_1124	hsa-mir-novel-chr10_1124	ACUCGGCGUGGCGUCGGUCGUGG	1.10052	0.884547	0.921077	up	1124	1021.33	203	2120	1046	1332	1221	508
hsa-miR-30e-5p	hsa-mir-30e	UGUAAACAUCCUUGACUGGAAG	-1.02512	0.887762	0.923063	down	278.667	285.667	407	117	309	405	204	245
hsa-miR-novel-chr19_10425	hsa-mir-novel-chr19_10425	ACCAUCGACCGUUGAGUGGAC	-1.16667	0.892826	0.926963	down	20	23.3333	57			18	15	34
hsa-miR-98-5p	hsa-mir-98	UGAGGUAGUAAGUUGUAUUGUU	-1.07595	0.904964	0.937726	down	105.333	113.333	113	65	135	200	110	27
hsa-miR-99b-5p	hsa-mir-99b	CACCCGUAGAACCGACCUUGCG	-1.10032	0.909035	0.937726	down	206	226.667	203	312	100	215	60	402
hsa-miR-181b-5p	hsa-mir-181b-1	AACAUUCAUUGCUGUCGGUGGGU	1.10526	0.909278	0.937726	up	14	12.6667		22	17	10		25
hsa-miR-181b-5p	hsa-mir-181b-2	AACAUUCAUUGCUGUCGGUGGGU	1.10526	0.909278	0.937726	up	14	12.6667		22	17	10		25
hsa-miR-590-3p	hsa-mir-590	UAAUUUUAUGUAUAAGCUAGU	1.2	0.909833	0.937726	up	6	5			15	12
hsa-let-7a-5p	hsa-let-7a-1	UGAGGUAGUAGGUUGUAUAGUU	-1.10468	0.91437	0.938293	down	1347	1488	1168	611	2259	3163	1033	265
hsa-let-7a-5p	hsa-let-7a-2	UGAGGUAGUAGGUUGUAUAGUU	-1.10468	0.91437	0.938293	down	1347	1488	1168	611	2259	3163	1033	265
hsa-let-7a-5p	hsa-let-7a-3	UGAGGUAGUAGGUUGUAUAGUU	-1.10468	0.91437	0.938293	down	1347	1488	1168	611	2259	3163	1033	265
hsa-miR-148b-3p	hsa-mir-148b	UCAGUGCAUCACAGAACUUUGU	1.07744	0.9182	0.940855	up	1020.33	947	927	507	1624	1693	832	313
hsa-miR-381-3p	hsa-mir-381	UAUACAAGGGCAAGCUCUCUGU	1.12346	0.929455	0.951007	up	30.3333	27	68		20		15	63
hsa-let-7i-3p	hsa-let-7i	CUGCGCAAGCUACUGCCUUGCU	1.06452	0.937378	0.956813	up	11	10.3333			30	12		16
hsa-miR-140-3p	hsa-mir-140	UACCACAGGGUAGAACCACGG	1.03895	0.93784	0.956813	up	595.667	573.333	859	377	548	405	340	972
hsa-miR-340-3p	hsa-mir-340	UCCGUCUCAGUUACUUUAUAGC	-1.13043	0.943173	0.958913	down	7.66667	8.66667			20		23
hsa-miR-143-3p	hsa-mir-143	UGAGAUGAAGCACUGUAGCUC	-1.05114	0.946132	0.958913	down	11133.7	11703	15493	9260	8645	5647	5779	23680
hsa-miR-199a-3p	hsa-mir-199a-1	ACAGUAGUCUGCACAUUGGUUA	-1.0609	0.946689	0.958913	down	273.667	290.333	271	82	465	572	249	47
hsa-miR-199a-3p	hsa-mir-199a-2	ACAGUAGUCUGCACAUUGGUUA	-1.0609	0.946689	0.958913	down	273.667	290.333	271	82	465	572	249	47
hsa-miR-199b-3p	hsa-mir-199b	ACAGUAGUCUGCACAUUGGUUA	-1.0609	0.946689	0.958913	down	273.667	290.333	271	82	465	572	249	47
hsa-miR-28-5p	hsa-mir-28	AAGGAGCUCACAGUCUAUUGAG	1.05	0.953733	0.964618	up	35	33.3333		52	50	30		67
hsa-miR-200c-3p	hsa-mir-200c	UAAUACUGCCGGGUAAUGAUGGA	1.04	0.955053	0.964618	up	26	25	45		30	24	30	18
hsa-miR-424-5p	hsa-mir-424	CAGCAGCAAUUCAUGUUUUGAA	1.09524	0.957086	0.965289	up	7.66667	7			20	18
hsa-miR-16-5p	hsa-mir-16-1	UAGCAGCACGUAAAUAUUGGCG	-1.02256	0.965106	0.970605	down	694.333	710	644	345	1091	1028	624	475
hsa-miR-16-5p	hsa-mir-16-2	UAGCAGCACGUAAAUAUUGGCG	-1.02256	0.965106	0.970605	down	694.333	710	644	345	1091	1028	624	475
hsa-miR-625-3p	hsa-mir-625	GACUAUAGAACUUUCCCCCUCA	1.05882	0.967366	0.9712	up	6	5.66667			15	12		2
hsa-miR-142-3p	hsa-mir-142	UGUAGUGUUUCCUACUUUAUGGA	-1.01126	0.968448	0.9712	down	148	149.667	203	39	199	274	30	142
hsa-miR-32-5p	hsa-mir-32	UAUUGCACAUUACUAAGUUGCA	-1.02041	0.973675	0.975056	down	16.3333	16.6667		26	20	18	15	14
hsa-miR-342-3p	hsa-mir-342	UCUCACACAGAAAUCGCACCCGU	1	1	1	up	16	16	45			12	15	18
